# Supplementary material for: Postural adjustments and perceptual responses of Nordic running: concurrent effects of poles and irregular terrain
Source: PubMed Central journal article supplement (PMC11129971; doi:10.1007/s00421-023-05397-9), 2024-01-17
Supplement: 421_2023_5397_MOESM1_ESM.pdf [file 421_2023_5397_MOESM1_ESM.pdf]

**STATISTICAL ANALYSIS.**  
**IVANISKI-MELLO ET AL.**  
**POSTURAL ADJUSTMENTS AND PERCEPTUAL RESPON**  
**SES OF NORDIC RUNNING:**  
**CONCURRENT EFFECTS OF POLES AND IRREGULAR**  
**TERRAIN**

**SPATIOTEMPORAL VARIABLES**

```
GENLIN Velocity BY Terrain Running (ORDER=ASCENDING)
  /MODEL Terrain Running Terrain*Running INTERCEPT=YES
DISTRIBUTION=GAMMA LINK=LOG
  /CRITERIA SCALE=MLE PCONVERGE=1E-006(ABSOLUTE) SINGULAR=1E-012 ANALYSISTY
PE=3(WALD) CILEVEL=95
  LIKELIHOOD=FULL
  /EMMEANS TABLES=Terrain SCALE=ORIGINAL COMPARE=Terrain CONTRAST=PAIRWISE
PADJUST=BONFERRONI
  /EMMEANS TABLES=Running SCALE=ORIGINAL COMPARE=Running CONTRAST=PAIRWISE
PADJUST=BONFERRONI
  /EMMEANS TABLES=Terrain*Running SCALE=ORIGINAL COMPARE=Running*Terrain CO
NTRAST=PAIRWISE
  PADJUST=BONFERRONI
  /REPEATED SUBJECT=Subject SORT=YES CORRTYPE=INDEPENDENT ADJUSTCORR=YES CO
VB=ROBUST
  /MISSING CLASSMISSING=EXCLUDE
  /PRINT CPS DESCRIPTIVES MODELINFO FIT SUMMARY SOLUTION.
```

**Generalized Linear Models**

## Notes

|                        |                                |                                                                                                                                        |
|------------------------|--------------------------------|----------------------------------------------------------------------------------------------------------------------------------------|
| Output Created         |                                | 30-OCT-2023 12:18:02                                                                                                                   |
| Comments               |                                |                                                                                                                                        |
| Input                  | Data                           | C:<br>\Users\andre\Documents\<br>Andre\Pesquisa\Artigos<br>para Publicar\Nordic<br>Running\Data\Statistics\S<br>PSS\Spatiotemporal.sav |
|                        | Active Dataset                 | DataSet1                                                                                                                               |
|                        | Filter                         | <none>                                                                                                                                 |
|                        | Weight                         | <none>                                                                                                                                 |
|                        | Split File                     | <none>                                                                                                                                 |
|                        | N of Rows in Working Data File | 49                                                                                                                                     |
| Missing Value Handling | Definition of Missing          | User-defined missing values for factor, subject and within-subject variables are treated as missing.                                   |
|                        | Cases Used                     | Statistics are based on cases with valid data for all variables in the model.                                                          |
| Weight Handling        |                                | not applicable                                                                                                                         |

## Notes

|           |                                                                                                                                                                                                                                                                                                                                                                                                                                                                                                                                                                                                                                                                                                                                                           |             |
|-----------|-----------------------------------------------------------------------------------------------------------------------------------------------------------------------------------------------------------------------------------------------------------------------------------------------------------------------------------------------------------------------------------------------------------------------------------------------------------------------------------------------------------------------------------------------------------------------------------------------------------------------------------------------------------------------------------------------------------------------------------------------------------|-------------|
| Syntax    | <pre> GENLIN Velocity BY Terrain Running (ORDER=ASCENDING)  /MODEL Terrain Running Terrain*Running INTERCEPT=YES DISTRIBUTION=GAMMA LINK=LOG  /CRITERIA SCALE=MLE PCONVERGE=1E-006 (ABSOLUTE) SINGULAR=1E-012 ANALYSISTYPE=3 (WALD) CILEVEL=95 LIKELIHOOD=FULL  /EMMEANS TABLES=Terrain SCALE=ORIGINAL COMPARE=Terrain CONTRAST=PAIRWISE PADJUST=BONFERRONI  /EMMEANS TABLES=Running SCALE=ORIGINAL COMPARE=Running CONTRAST=PAIRWISE PADJUST=BONFERRONI  /EMMEANS TABLES=Terrain*Running SCALE=ORIGINAL COMPARE=Running*Terrain CONTRAST=PAIRWISE  PADJUST=BONFERRONI  /REPEATED SUBJECT=Subject SORT=YES CORRTYPE=INDEPENDENT ADJUSTCORR=YES COVB=ROBUST  /MISSING CLASSMISSING=EXCLUDE  /PRINT CPS DESCRIPTIVES MODELINFO FIT SUMMARY SOLUTION. </pre> |             |
| Resources | Processor Time                                                                                                                                                                                                                                                                                                                                                                                                                                                                                                                                                                                                                                                                                                                                            | 00:00:00.06 |
|           | Elapsed Time                                                                                                                                                                                                                                                                                                                                                                                                                                                                                                                                                                                                                                                                                                                                              | 00:00:00.07 |

### Model Information

|                                      |             |
|--------------------------------------|-------------|
| Dependent Variable                   | Velocity    |
| Probability Distribution             | Gamma       |
| Link Function                        | Log         |
| Subject Effect 1                     | Subject     |
| Working Correlation Matrix Structure | Independent |

### Case Processing Summary

|          | N  | Percent |
|----------|----|---------|
| Included | 46 | 93.9%   |
| Excluded | 3  | 6.1%    |
| Total    | 49 | 100.0%  |

### Correlated Data Summary

|                                    |                |         |    |
|------------------------------------|----------------|---------|----|
| Number of Levels                   | Subject Effect | Subject | 13 |
| Number of Subjects                 |                |         | 13 |
| Number of Measurements per Subject | Minimum        |         | 2  |
|                                    | Maximum        |         | 4  |
| Correlation Matrix Dimension       |                |         | 4  |

### Categorical Variable Information

|        |         |           | N  | Percent |
|--------|---------|-----------|----|---------|
| Factor | Terrain | Regular   | 26 | 56.5%   |
|        |         | Irregular | 20 | 43.5%   |
|        |         | Total     | 46 | 100.0%  |
|        | Running | Free      | 24 | 52.2%   |
|        |         | Nordic    | 22 | 47.8%   |
|        |         | Total     | 46 | 100.0%  |

### Continuous Variable Information

|                    |          | N  | Minimum | Maximum | Mean   | Std. Deviation |
|--------------------|----------|----|---------|---------|--------|----------------|
| Dependent Variable | Velocity | 46 | 2.64    | 4.43    | 3.3713 | .36699         |

## Goodness of Fit<sup>a</sup>

|                                                                                   | Value |
|-----------------------------------------------------------------------------------|-------|
| Quasi Likelihood under Independence Model Criterion (QIC) <sup>b</sup>            | 8.777 |
| Corrected Quasi Likelihood under Independence Model Criterion (QICC) <sup>b</sup> | 8.512 |

Dependent Variable: Velocity  
Model: (Intercept), Terrain, Running,  
Terrain \* Running<sup>a</sup>

- Information criteria are in smaller-is-better form.
- Computed using the full log quasi-likelihood function.

## Tests of Model Effects

| Source            | Wald Chi-Square | Type III |      |
|-------------------|-----------------|----------|------|
|                   |                 | df       | Sig. |
| (Intercept)       | 2843.469        | 1        | .000 |
| Terrain           | .964            | 1        | .326 |
| Running           | .197            | 1        | .658 |
| Terrain * Running | 1.517           | 1        | .218 |

Dependent Variable: Velocity  
Model: (Intercept), Terrain, Running, Terrain \* Running

### Parameter Estimates

| Parameter                          | B              | Std. Error | 95% Wald Confidence Interval |       | Hypothesis Test |
|------------------------------------|----------------|------------|------------------------------|-------|-----------------|
|                                    |                |            | Lower                        | Upper | Wald Chi-Square |
| (Intercept)                        | 1.253          | .0445      | 1.165                        | 1.340 | 793.885         |
| [Terrain=1.00]                     | -.058          | .0350      | -.127                        | .010  | 2.763           |
| [Terrain=2.00]                     | 0 <sup>a</sup> | .          | .                            | .     | .               |
| [Running=1.00]                     | -.035          | .0358      | -.105                        | .035  | .939            |
| [Running=2.00]                     | 0 <sup>a</sup> | .          | .                            | .     | .               |
| [Terrain=1.00] *<br>[Running=1.00] | .048           | .0387      | -.028                        | .124  | 1.517           |
| [Terrain=1.00] *<br>[Running=2.00] | 0 <sup>a</sup> | .          | .                            | .     | .               |
| [Terrain=2.00] *<br>[Running=1.00] | 0 <sup>a</sup> | .          | .                            | .     | .               |
| [Terrain=2.00] *<br>[Running=2.00] | 0 <sup>a</sup> | .          | .                            | .     | .               |
| (Scale)                            | .012           |            |                              |       |                 |

### Parameter Estimates

| Parameter                          | Hypothesis Test |      |
|------------------------------------|-----------------|------|
|                                    | df              | Sig. |
| (Intercept)                        | 1               | .000 |
| [Terrain=1.00]                     | 1               | .096 |
| [Terrain=2.00]                     | .               | .    |
| [Running=1.00]                     | 1               | .333 |
| [Running=2.00]                     | .               | .    |
| [Terrain=1.00] *<br>[Running=1.00] | 1               | .218 |
| [Terrain=1.00] *<br>[Running=2.00] | .               | .    |
| [Terrain=2.00] *<br>[Running=1.00] | .               | .    |
| [Terrain=2.00] *<br>[Running=2.00] | .               | .    |
| (Scale)                            |                 |      |

Dependent Variable: Velocity

Model: (Intercept), Terrain, Running, Terrain \* Running

a. Set to zero because this parameter is redundant.

### Estimated Marginal Means 1: Terrain

### Estimates

| Terrain   | Mean   | Std. Error | 95% Wald Confidence Interval |        |
|-----------|--------|------------|------------------------------|--------|
|           |        |            | Lower                        | Upper  |
| Regular   | 3.3231 | .07734     | 3.1750                       | 3.4782 |
| Irregular | 3.4392 | .11476     | 3.2215                       | 3.6717 |

### Pairwise Comparisons

| (I) Terrain | (J) Terrain | Mean Difference (I-J) | Std. Error | df | Bonferroni Sig. | 95% Wald Confidence ... |
|-------------|-------------|-----------------------|------------|----|-----------------|-------------------------|
|             |             |                       |            |    |                 | Lower                   |
| Regular     | Irregular   | -.1161                | .11922     | 1  | .330            | -.3498                  |
| Irregular   | Regular     | .1161                 | .11922     | 1  | .330            | -.1176                  |

### Pairwise Comparisons

| (I) Terrain | (J) Terrain | 95% Wald Confidence ... |
|-------------|-------------|-------------------------|
|             |             | Upper                   |
| Regular     | Irregular   | .1176                   |
| Irregular   | Regular     | .3498                   |

Pairwise comparisons of estimated marginal means based on the original scale of dependent variable Velocity

### Overall Test Results

| Wald Chi-Square | df | Sig. |
|-----------------|----|------|
| .948            | 1  | .330 |

The Wald chi-square tests the effect of Terrain. This test is based on the linearly independent pairwise comparisons among the estimated marginal means.

## Estimated Marginal Means 2: Running

### Estimates

| Running | Mean   | Std. Error | 95% Wald Confidence Interval |        |
|---------|--------|------------|------------------------------|--------|
|         |        |            | Lower                        | Upper  |
| Free    | 3.3625 | .06909     | 3.2297                       | 3.5006 |
| Nordic  | 3.3990 | .10304     | 3.2030                       | 3.6071 |

### Pairwise Comparisons

| (I) Running | (J) Running | Mean Difference (I-J) | Std. Error | df | Bonferroni Sig. | 95% Wald Confidence ...<br>Lower |
|-------------|-------------|-----------------------|------------|----|-----------------|----------------------------------|
| Free        | Nordic      | -.0366                | .08283     | 1  | .659            | -.1989                           |
| Nordic      | Free        | .0366                 | .08283     | 1  | .659            | -.1258                           |

### Pairwise Comparisons

| (I) Running | (J) Running | 95% Wald Confidence ...<br>Upper |
|-------------|-------------|----------------------------------|
| Free        | Nordic      | .1258                            |
| Nordic      | Free        | .1989                            |

Pairwise comparisons of estimated marginal means based on the original scale of dependent variable Velocity

### Overall Test Results

| Wald Chi-Square | df | Sig. |
|-----------------|----|------|
| .195            | 1  | .659 |

The Wald chi-square tests the effect of Running. This test is based on the linearly independent pairwise comparisons among the estimated marginal means.

### Estimated Marginal Means 3: Terrain\* Running

#### Estimates

| Terrain   | Running | Mean   | Std. Error | 95% Wald Confidence Interval |        |
|-----------|---------|--------|------------|------------------------------|--------|
|           |         |        |            | Lower                        | Upper  |
| Regular   | Free    | 3.3448 | .10251     | 3.1498                       | 3.5519 |
|           | Nordic  | 3.3016 | .07188     | 3.1637                       | 3.4455 |
| Irregular | Free    | 3.3802 | .10085     | 3.1882                       | 3.5837 |
|           | Nordic  | 3.4993 | .15556     | 3.2073                       | 3.8179 |



### Pairwise Comparisons

| (I) Running*Terrain           | (J) Running*Terrain           | Mean Difference (I-J) | Std. Error | df |
|-------------------------------|-------------------------------|-----------------------|------------|----|
| [Running=1.00]*[Terrain=1.00] | [Running=1.00]*[Terrain=2.00] | -.0353                | .14924     | 1  |
|                               | [Running=2.00]*[Terrain=1.00] | .0433                 | .08577     | 1  |
|                               | [Running=2.00]*[Terrain=2.00] | -.1545                | .17442     | 1  |
| [Running=1.00]*[Terrain=2.00] | [Running=1.00]*[Terrain=1.00] | .0353                 | .14924     | 1  |
|                               | [Running=2.00]*[Terrain=1.00] | .0786                 | .11063     | 1  |
|                               | [Running=2.00]*[Terrain=2.00] | -.1192                | .12487     | 1  |
| [Running=2.00]*[Terrain=1.00] | [Running=1.00]*[Terrain=1.00] | -.0433                | .08577     | 1  |
|                               | [Running=1.00]*[Terrain=2.00] | -.0786                | .11063     | 1  |
|                               | [Running=2.00]*[Terrain=2.00] | -.1978                | .12332     | 1  |
| [Running=2.00]*[Terrain=2.00] | [Running=1.00]*[Terrain=1.00] | .1545                 | .17442     | 1  |
|                               | [Running=1.00]*[Terrain=2.00] | .1192                 | .12487     | 1  |
|                               | [Running=2.00]*[Terrain=1.00] | .1978                 | .12332     | 1  |

### Pairwise Comparisons

| (I) Running*Terrain           | (J) Running*Terrain           | Bonferroni Sig. | 95% Wald Confidence ...<br>Lower |
|-------------------------------|-------------------------------|-----------------|----------------------------------|
| [Running=1.00]*[Terrain=1.00] | [Running=1.00]*[Terrain=2.00] | 1.000           | -.4291                           |
|                               | [Running=2.00]*[Terrain=1.00] | 1.000           | -.1830                           |
|                               | [Running=2.00]*[Terrain=2.00] | 1.000           | -.6147                           |
| [Running=1.00]*[Terrain=2.00] | [Running=1.00]*[Terrain=1.00] | 1.000           | -.3584                           |
|                               | [Running=2.00]*[Terrain=1.00] | 1.000           | -.2133                           |
|                               | [Running=2.00]*[Terrain=2.00] | 1.000           | -.4486                           |
| [Running=2.00]*[Terrain=1.00] | [Running=1.00]*[Terrain=1.00] | 1.000           | -.2696                           |
|                               | [Running=1.00]*[Terrain=2.00] | 1.000           | -.3705                           |
|                               | [Running=2.00]*[Terrain=2.00] | .653            | -.5231                           |
| [Running=2.00]*[Terrain=2.00] | [Running=1.00]*[Terrain=1.00] | 1.000           | -.3057                           |
|                               | [Running=1.00]*[Terrain=2.00] | 1.000           | -.2103                           |
|                               | [Running=2.00]*[Terrain=1.00] | .653            | -.1276                           |

### Pairwise Comparisons

|                               |                               | 95% Wald<br>Confidence ... |
|-------------------------------|-------------------------------|----------------------------|
| (I) Running*Terrain           | (J) Running*Terrain           | Upper                      |
| [Running=1.00]*[Terrain=1.00] | [Running=1.00]*[Terrain=2.00] | .3584                      |
|                               | [Running=2.00]*[Terrain=1.00] | .2696                      |
|                               | [Running=2.00]*[Terrain=2.00] | .3057                      |
| [Running=1.00]*[Terrain=2.00] | [Running=1.00]*[Terrain=1.00] | .4291                      |
|                               | [Running=2.00]*[Terrain=1.00] | .3705                      |
|                               | [Running=2.00]*[Terrain=2.00] | .2103                      |
| [Running=2.00]*[Terrain=1.00] | [Running=1.00]*[Terrain=1.00] | .1830                      |
|                               | [Running=1.00]*[Terrain=2.00] | .2133                      |
|                               | [Running=2.00]*[Terrain=2.00] | .1276                      |
| [Running=2.00]*[Terrain=2.00] | [Running=1.00]*[Terrain=1.00] | .6147                      |
|                               | [Running=1.00]*[Terrain=2.00] | .4486                      |
|                               | [Running=2.00]*[Terrain=1.00] | .5231                      |

Pairwise comparisons of estimated marginal means based on the original scale of dependent variable Velocity

### Overall Test Results

| Wald Chi-Square | df | Sig. |
|-----------------|----|------|
| 3.977           | 3  | .264 |

The Wald chi-square tests the effect of Running\*Terrain. This test is based on the linearly independent pairwise comparisons among the estimated marginal means.

```
GENLIN Stride_time BY Terrain Running (ORDER=ASCENDING)
  /MODEL Terrain Running Terrain*Running INTERCEPT=YES
DISTRIBUTION=NORMAL LINK=IDENTITY
```

```

/CRITERIA SCALE=MLE PCONVERGE=1E-006(ABSOLUTE) SINGULAR=1E-012 ANALYSISTY
PE=3(WALD) CILEVEL=95
LIKELIHOOD=FULL
/EMMEANS TABLES=Terrain SCALE=ORIGINAL COMPARE=Terrain CONTRAST=PAIRWISE
PADJUST=BONFERRONI
/EMMEANS TABLES=Running SCALE=ORIGINAL COMPARE=Running CONTRAST=PAIRWISE
PADJUST=BONFERRONI
/EMMEANS TABLES=Terrain*Running SCALE=ORIGINAL COMPARE=Running*Terrain CO
NTRAST=PAIRWISE
PADJUST=BONFERRONI
/REPEATED SUBJECT=Subject SORT=YES CORRTYPE=INDEPENDENT ADJUSTCORR=YES CO
VB=ROBUST
/MISSING CLASSMISSING=EXCLUDE
/PRINT CPS DESCRIPTIVES MODELINFO FIT SUMMARY SOLUTION.

```

## Generalized Linear Models

### Notes

|                        |                                |                                                                                                                                        |
|------------------------|--------------------------------|----------------------------------------------------------------------------------------------------------------------------------------|
| Output Created         |                                | 30-OCT-2023 12:20:46                                                                                                                   |
| Comments               |                                |                                                                                                                                        |
| Input                  | Data                           | C:<br>\Users\andre\Documents\<br>Andre\Pesquisa\Artigos<br>para Publicar\Nordic<br>Running\Data\Statistics\S<br>PSS\Spatiotemporal.sav |
|                        | Active Dataset                 | DataSet1                                                                                                                               |
|                        | Filter                         | <none>                                                                                                                                 |
|                        | Weight                         | <none>                                                                                                                                 |
|                        | Split File                     | <none>                                                                                                                                 |
|                        | N of Rows in Working Data File | 49                                                                                                                                     |
| Missing Value Handling | Definition of Missing          | User-defined missing values for factor, subject and within-subject variables are treated as missing.                                   |
|                        | Cases Used                     | Statistics are based on cases with valid data for all variables in the model.                                                          |
| Weight Handling        |                                | not applicable                                                                                                                         |

## Notes

|           |                                                                                                                                                                                                                                                                                                                                                                                                                                                                                                                                                                                                                                                                                                                                                                          |             |
|-----------|--------------------------------------------------------------------------------------------------------------------------------------------------------------------------------------------------------------------------------------------------------------------------------------------------------------------------------------------------------------------------------------------------------------------------------------------------------------------------------------------------------------------------------------------------------------------------------------------------------------------------------------------------------------------------------------------------------------------------------------------------------------------------|-------------|
| Syntax    | <pre> GENLIN Stride_time BY Terrain Running (ORDER=ASCENDING)  /MODEL Terrain Running Terrain*Running INTERCEPT=YES  DISTRIBUTION=NORMA L LINK=IDENTITY  /CRITERIA SCALE=MLE PCONVERGE=1E-006 (ABSOLUTE) SINGULAR=1E-012 ANALYSISTYPE=3 (WALD) CILEVEL=95  LIKELIHOOD=FULL  /EMMEANS TABLES=Terrain SCALE=ORIGINAL COMPARE=Terrain CONTRAST=PAIRWISE PADJUST=BONFERRONI  /EMMEANS TABLES=Running SCALE=ORIGINAL COMPARE=Running CONTRAST=PAIRWISE PADJUST=BONFERRONI  /EMMEANS TABLES=Terrain*Running SCALE=ORIGINAL COMPARE=Running*Terr ain CONTRAST=PAIRWISE  PADJUST=BONFERRONI  /REPEATED SUBJECT=Subject SORT=YES CORRTYPE=INDEPEND ENT ADJUSTCORR=YES COVB=ROBUST  /MISSING CLASSMISSING=EXCLU DE  /PRINT CPS DESCRIPTIVES MODELINFO FIT SUMMARY SOLUTION. </pre> |             |
| Resources | Processor Time                                                                                                                                                                                                                                                                                                                                                                                                                                                                                                                                                                                                                                                                                                                                                           | 00:00:00.06 |
|           | Elapsed Time                                                                                                                                                                                                                                                                                                                                                                                                                                                                                                                                                                                                                                                                                                                                                             | 00:00:00.07 |

### Model Information

|                                      |             |         |
|--------------------------------------|-------------|---------|
| Dependent Variable                   | Stride_time |         |
| Probability Distribution             | Normal      |         |
| Link Function                        | Identity    |         |
| Subject Effect                       | 1           | Subject |
| Working Correlation Matrix Structure | Independent |         |

### Case Processing Summary

|          | N  | Percent |
|----------|----|---------|
| Included | 48 | 98.0%   |
| Excluded | 1  | 2.0%    |
| Total    | 49 | 100.0%  |

### Correlated Data Summary

|                                    |                |         |    |
|------------------------------------|----------------|---------|----|
| Number of Levels                   | Subject Effect | Subject | 13 |
| Number of Subjects                 |                |         | 13 |
| Number of Measurements per Subject | Minimum        |         | 2  |
|                                    | Maximum        |         | 4  |
| Correlation Matrix Dimension       |                |         | 4  |

### Categorical Variable Information

|        |         |           | N  | Percent |
|--------|---------|-----------|----|---------|
| Factor | Terrain | Regular   | 26 | 54.2%   |
|        |         | Irregular | 22 | 45.8%   |
|        |         | Total     | 48 | 100.0%  |
|        | Running | Free      | 24 | 50.0%   |
|        |         | Nordic    | 24 | 50.0%   |
|        |         | Total     | 48 | 100.0%  |

### Continuous Variable Information

|                    |             | N  | Minimum | Maximum | Mean  | Std. Deviation |
|--------------------|-------------|----|---------|---------|-------|----------------|
| Dependent Variable | Stride_time | 48 | .67     | .85     | .7582 | .04314         |

## Goodness of Fit<sup>a</sup>

|                                                                                   | Value |
|-----------------------------------------------------------------------------------|-------|
| Quasi Likelihood under Independence Model Criterion (QIC) <sup>b</sup>            | 8.128 |
| Corrected Quasi Likelihood under Independence Model Criterion (QICC) <sup>b</sup> | 8.079 |

Dependent Variable: Stride\_time  
Model: (Intercept), Terrain, Running, Terrain \* Running<sup>a</sup>

- Information criteria are in smaller-is-better form.
- Computed using the full log quasi-likelihood function.

## Tests of Model Effects

| Source            | Wald Chi-Square | Type III |      |
|-------------------|-----------------|----------|------|
|                   |                 | df       | Sig. |
| (Intercept)       | 5515.520        | 1        | .000 |
| Terrain           | .569            | 1        | .451 |
| Running           | 16.942          | 1        | .000 |
| Terrain * Running | 2.963           | 1        | .085 |

Dependent Variable: Stride\_time  
Model: (Intercept), Terrain, Running, Terrain \* Running

### Parameter Estimates

| Parameter                          | B              | Std. Error | 95% Wald Confidence Interval |       | Hypothesis Test |
|------------------------------------|----------------|------------|------------------------------|-------|-----------------|
|                                    |                |            | Lower                        | Upper | Wald Chi-Square |
| (Intercept)                        | .771           | .0144      | .743                         | .800  | 2872.667        |
| [Terrain=1.00]                     | -.002          | .0123      | -.026                        | .022  | .020            |
| [Terrain=2.00]                     | 0 <sup>a</sup> | .          | .                            | .     | .               |
| [Running=1.00]                     | -.018          | .0074      | -.033                        | -.004 | 5.977           |
| [Running=2.00]                     | 0 <sup>a</sup> | .          | .                            | .     | .               |
| [Terrain=1.00] *<br>[Running=1.00] | -.012          | .0067      | -.025                        | .002  | 2.963           |
| [Terrain=1.00] *<br>[Running=2.00] | 0 <sup>a</sup> | .          | .                            | .     | .               |
| [Terrain=2.00] *<br>[Running=1.00] | 0 <sup>a</sup> | .          | .                            | .     | .               |
| [Terrain=2.00] *<br>[Running=2.00] | 0 <sup>a</sup> | .          | .                            | .     | .               |
| (Scale)                            | .002           |            |                              |       |                 |

### Parameter Estimates

| Parameter                          | Hypothesis Test |      |
|------------------------------------|-----------------|------|
|                                    | df              | Sig. |
| (Intercept)                        | 1               | .000 |
| [Terrain=1.00]                     | 1               | .888 |
| [Terrain=2.00]                     | .               | .    |
| [Running=1.00]                     | 1               | .014 |
| [Running=2.00]                     | .               | .    |
| [Terrain=1.00] *<br>[Running=1.00] | 1               | .085 |
| [Terrain=1.00] *<br>[Running=2.00] | .               | .    |
| [Terrain=2.00] *<br>[Running=1.00] | .               | .    |
| [Terrain=2.00] *<br>[Running=2.00] | .               | .    |
| (Scale)                            |                 |      |

Dependent Variable: Stride\_time

Model: (Intercept), Terrain, Running, Terrain \* Running

a. Set to zero because this parameter is redundant.

### Estimated Marginal Means 1: Terrain



### Estimates

| Terrain   | Mean  | Std. Error | 95% Wald Confidence Interval |       |
|-----------|-------|------------|------------------------------|-------|
|           |       |            | Lower                        | Upper |
| Regular   | .7548 | .01048     | .7342                        | .7753 |
| Irregular | .7623 | .01217     | .7384                        | .7861 |

### Pairwise Comparisons

| (I) Terrain | (J) Terrain | Mean Difference (I-J) | Std. Error | df | Bonferroni Sig. | 95% Wald Confidence ... |
|-------------|-------------|-----------------------|------------|----|-----------------|-------------------------|
|             |             |                       |            |    |                 | Lower                   |
| Regular     | Irregular   | -.0075                | .00993     | 1  | .451            | -.0270                  |
| Irregular   | Regular     | .0075                 | .00993     | 1  | .451            | -.0120                  |

### Pairwise Comparisons

| (I) Terrain | (J) Terrain | 95% Wald Confidence ... |
|-------------|-------------|-------------------------|
|             |             | Upper                   |
| Regular     | Irregular   | .0120                   |
| Irregular   | Regular     | .0270                   |

Pairwise comparisons of estimated marginal means based on the original scale of dependent variable Stride\_time

### Overall Test Results

| Wald Chi-Square | df | Sig. |
|-----------------|----|------|
| .569            | 1  | .451 |

The Wald chi-square tests the effect of Terrain. This test is based on the linearly independent pairwise comparisons among the estimated marginal means.

## Estimated Marginal Means 2: Running

### Estimates

| Running | Mean  | Std. Error | 95% Wald Confidence Interval |       |
|---------|-------|------------|------------------------------|-------|
|         |       |            | Lower                        | Upper |
| Free    | .7466 | .00951     | .7279                        | .7652 |
| Nordic  | .7705 | .01162     | .7477                        | .7933 |

### Pairwise Comparisons

| (I) Running | (J) Running | Mean Difference (I-J) | Std. Error | df | Bonferroni Sig. | 95% Wald Confidence ...<br>Lower |
|-------------|-------------|-----------------------|------------|----|-----------------|----------------------------------|
| Free        | Nordic      | -.0239 <sup>a</sup>   | .00582     | 1  | .000            | -.0353                           |
| Nordic      | Free        | .0239 <sup>a</sup>    | .00582     | 1  | .000            | .0125                            |

### Pairwise Comparisons

| (I) Running | (J) Running | 95% Wald Confidence ...<br>Upper |
|-------------|-------------|----------------------------------|
| Free        | Nordic      | -.0125                           |
| Nordic      | Free        | .0353                            |

Pairwise comparisons of estimated marginal means based on the original scale of dependent variable Stride\_time

a. The mean difference is significant at the .05 level.

### Overall Test Results

| Wald Chi-Square | df | Sig. |
|-----------------|----|------|
| 16.942          | 1  | .000 |

The Wald chi-square tests the effect of Running. This test is based on the linearly independent pairwise comparisons among the estimated marginal means.

### Estimated Marginal Means 3: Terrain\* Running

#### Estimates

| Terrain   | Running | Mean  | Std. Error | 95% Wald Confidence Interval |       |
|-----------|---------|-------|------------|------------------------------|-------|
|           |         |       |            | Lower                        | Upper |
| Regular   | Free    | .7399 | .00993     | .7205                        | .7594 |
|           | Nordic  | .7696 | .01176     | .7466                        | .7927 |
| Irregular | Free    | .7532 | .01081     | .7320                        | .7744 |
|           | Nordic  | .7714 | .01439     | .7432                        | .7996 |

### Pairwise Comparisons

| (I) Running*Terrain           | (J) Running*Terrain           | Mean Difference (I-J) | Std. Error | df |
|-------------------------------|-------------------------------|-----------------------|------------|----|
| [Running=1.00]*[Terrain=1.00] | [Running=1.00]*[Terrain=2.00] | -.0133                | .00832     | 1  |
|                               | [Running=2.00]*[Terrain=1.00] | -.0297 <sup>a</sup>   | .00590     | 1  |
|                               | [Running=2.00]*[Terrain=2.00] | -.0314 <sup>a</sup>   | .01133     | 1  |
| [Running=1.00]*[Terrain=2.00] | [Running=1.00]*[Terrain=1.00] | .0133                 | .00832     | 1  |
|                               | [Running=2.00]*[Terrain=1.00] | -.0165                | .01169     | 1  |
|                               | [Running=2.00]*[Terrain=2.00] | -.0182                | .00744     | 1  |
| [Running=2.00]*[Terrain=1.00] | [Running=1.00]*[Terrain=1.00] | .0297 <sup>a</sup>    | .00590     | 1  |
|                               | [Running=1.00]*[Terrain=2.00] | .0165                 | .01169     | 1  |
|                               | [Running=2.00]*[Terrain=2.00] | -.0017                | .01227     | 1  |
| [Running=2.00]*[Terrain=2.00] | [Running=1.00]*[Terrain=1.00] | .0314 <sup>a</sup>    | .01133     | 1  |
|                               | [Running=1.00]*[Terrain=2.00] | .0182                 | .00744     | 1  |
|                               | [Running=2.00]*[Terrain=1.00] | .0017                 | .01227     | 1  |

### Pairwise Comparisons

| (I) Running*Terrain           | (J) Running*Terrain           | Bonferroni Sig. | 95% Wald Confidence ...<br>Lower |
|-------------------------------|-------------------------------|-----------------|----------------------------------|
| [Running=1.00]*[Terrain=1.00] | [Running=1.00]*[Terrain=2.00] | .666            | -.0352                           |
|                               | [Running=2.00]*[Terrain=1.00] | .000            | -.0453                           |
|                               | [Running=2.00]*[Terrain=2.00] | .033            | -.0613                           |
| [Running=1.00]*[Terrain=2.00] | [Running=1.00]*[Terrain=1.00] | .666            | -.0087                           |
|                               | [Running=2.00]*[Terrain=1.00] | .955            | -.0473                           |
|                               | [Running=2.00]*[Terrain=2.00] | .087            | -.0378                           |
| [Running=2.00]*[Terrain=1.00] | [Running=1.00]*[Terrain=1.00] | .000            | .0141                            |
|                               | [Running=1.00]*[Terrain=2.00] | .955            | -.0144                           |
|                               | [Running=2.00]*[Terrain=2.00] | 1.000           | -.0341                           |
| [Running=2.00]*[Terrain=2.00] | [Running=1.00]*[Terrain=1.00] | .033            | .0016                            |
|                               | [Running=1.00]*[Terrain=2.00] | .087            | -.0014                           |
|                               | [Running=2.00]*[Terrain=1.00] | 1.000           | -.0306                           |

### Pairwise Comparisons

|                               |                               | 95% Wald<br>Confidence ... |
|-------------------------------|-------------------------------|----------------------------|
| (I) Running*Terrain           | (J) Running*Terrain           | Upper                      |
| [Running=1.00]*[Terrain=1.00] | [Running=1.00]*[Terrain=2.00] | .0087                      |
|                               | [Running=2.00]*[Terrain=1.00] | -.0141                     |
|                               | [Running=2.00]*[Terrain=2.00] | -.0016                     |
| [Running=1.00]*[Terrain=2.00] | [Running=1.00]*[Terrain=1.00] | .0352                      |
|                               | [Running=2.00]*[Terrain=1.00] | .0144                      |
|                               | [Running=2.00]*[Terrain=2.00] | .0014                      |
| [Running=2.00]*[Terrain=1.00] | [Running=1.00]*[Terrain=1.00] | .0453                      |
|                               | [Running=1.00]*[Terrain=2.00] | .0473                      |
|                               | [Running=2.00]*[Terrain=2.00] | .0306                      |
| [Running=2.00]*[Terrain=2.00] | [Running=1.00]*[Terrain=1.00] | .0613                      |
|                               | [Running=1.00]*[Terrain=2.00] | .0378                      |
|                               | [Running=2.00]*[Terrain=1.00] | .0341                      |

Pairwise comparisons of estimated marginal means based on the original scale of dependent variable Stride\_time

- a. The mean difference is significant at the .05 level.

### Overall Test Results

| Wald Chi-Square | df | Sig. |
|-----------------|----|------|
| 38.399          | 3  | .000 |

The Wald chi-square tests the effect of Running\*Terrain. This test is based on the linearly independent pairwise comparisons among the estimated marginal means.

```
GENLIN Stride_length BY Terrain Running (ORDER=ASCENDING)
  /MODEL Terrain Running Terrain*Running INTERCEPT=YES
```

```

DISTRIBUTION=GAMMA LINK=LOG
/CRITERIA SCALE=MLE PCONVERGE=1E-006(ABSOLUTE) SINGULAR=1E-012 ANALYSISTY
PE=3(WALD) CILEVEL=95
LIKELIHOOD=FULL
/EMMEANS TABLES=Terrain SCALE=ORIGINAL COMPARE=Terrain CONTRAST=PAIRWISE
PADJUST=BONFERRONI
/EMMEANS TABLES=Running SCALE=ORIGINAL COMPARE=Running CONTRAST=PAIRWISE
PADJUST=BONFERRONI
/EMMEANS TABLES=Terrain*Running SCALE=ORIGINAL COMPARE=Running*Terrain CO
NTRAST=PAIRWISE
PADJUST=BONFERRONI
/REPEATED SUBJECT=Subject SORT=YES CORRTYPE=INDEPENDENT ADJUSTCORR=YES CO
VB=ROBUST
/MISSING CLASSMISSING=EXCLUDE
/PRINT CPS DESCRIPTIVES MODELINFO FIT SUMMARY SOLUTION.

```

## Generalized Linear Models

### Notes

|                        |                                   |                                                                                                                                        |
|------------------------|-----------------------------------|----------------------------------------------------------------------------------------------------------------------------------------|
| Output Created         |                                   | 30-OCT-2023 12:22:10                                                                                                                   |
| Comments               |                                   |                                                                                                                                        |
| Input                  | Data                              | C:<br>\Users\andre\Documents\<br>Andre\Pesquisa\Artigos<br>para Publicar\Nordic<br>Running\Data\Statistics\S<br>PSS\Spatiotemporal.sav |
|                        | Active Dataset                    | DataSet1                                                                                                                               |
|                        | Filter                            | <none>                                                                                                                                 |
|                        | Weight                            | <none>                                                                                                                                 |
|                        | Split File                        | <none>                                                                                                                                 |
|                        | N of Rows in Working Data<br>File | 49                                                                                                                                     |
| Missing Value Handling | Definition of Missing             | User-defined missing<br>values for factor, subject<br>and within-subject<br>variables are treated as<br>missing.                       |
|                        | Cases Used                        | Statistics are based on<br>cases with valid data for<br>all variables in the model.                                                    |
| Weight Handling        |                                   | not applicable                                                                                                                         |

## Notes

|           |                                                                                                                                                                                                                                                                                                                                                                                                                                                                                                                                                                                                                                                                                                                                                                   |             |
|-----------|-------------------------------------------------------------------------------------------------------------------------------------------------------------------------------------------------------------------------------------------------------------------------------------------------------------------------------------------------------------------------------------------------------------------------------------------------------------------------------------------------------------------------------------------------------------------------------------------------------------------------------------------------------------------------------------------------------------------------------------------------------------------|-------------|
| Syntax    | <pre> GENLIN Stride_length BY Terrain Running (ORDER=ASCENDING)  /MODEL Terrain Running Terrain*Running INTERCEPT=YES DISTRIBUTION=GAMMA LINK=LOG  /CRITERIA SCALE=MLE PCONVERGE=1E-006 (ABSOLUTE) SINGULAR=1E-012 ANALYSISTYPE=3 (WALD) CILEVEL=95 LIKELIHOOD=FULL  /EMMEANS TABLES=Terrain SCALE=ORIGINAL COMPARE=Terrain CONTRAST=PAIRWISE PADJUST=BONFERRONI  /EMMEANS TABLES=Running SCALE=ORIGINAL COMPARE=Running CONTRAST=PAIRWISE PADJUST=BONFERRONI  /EMMEANS TABLES=Terrain*Running SCALE=ORIGINAL COMPARE=Running*Terr ain CONTRAST=PAIRWISE  PADJUST=BONFERRONI  /REPEATED SUBJECT=Subject SORT=YES CORRTYPE=INDEPEND ENT ADJUSTCORR=YES COVB=ROBUST  /MISSING CLASSMISSING=EXCLU DE  /PRINT CPS DESCRIPTIVES MODELINFO FIT SUMMARY SOLUTION. </pre> |             |
| Resources | Processor Time                                                                                                                                                                                                                                                                                                                                                                                                                                                                                                                                                                                                                                                                                                                                                    | 00:00:00.05 |
|           | Elapsed Time                                                                                                                                                                                                                                                                                                                                                                                                                                                                                                                                                                                                                                                                                                                                                      | 00:00:00.05 |

### Model Information

|                                      |               |
|--------------------------------------|---------------|
| Dependent Variable                   | Stride_length |
| Probability Distribution             | Gamma         |
| Link Function                        | Log           |
| Subject Effect 1                     | Subject       |
| Working Correlation Matrix Structure | Independent   |

### Case Processing Summary

|          | N  | Percent |
|----------|----|---------|
| Included | 46 | 93.9%   |
| Excluded | 3  | 6.1%    |
| Total    | 49 | 100.0%  |

### Correlated Data Summary

|                                    |                |         |    |
|------------------------------------|----------------|---------|----|
| Number of Levels                   | Subject Effect | Subject | 13 |
| Number of Subjects                 |                |         | 13 |
| Number of Measurements per Subject | Minimum        |         | 2  |
|                                    | Maximum        |         | 4  |
| Correlation Matrix Dimension       |                |         | 4  |

### Categorical Variable Information

|        |         |           | N  | Percent |
|--------|---------|-----------|----|---------|
| Factor | Terrain | Regular   | 26 | 56.5%   |
|        |         | Irregular | 20 | 43.5%   |
|        |         | Total     | 46 | 100.0%  |
|        | Running | Free      | 24 | 52.2%   |
|        |         | Nordic    | 22 | 47.8%   |
|        |         | Total     | 46 | 100.0%  |

### Continuous Variable Information

|                    |               | N  | Minimum | Maximum | Mean   | Std. Deviation |
|--------------------|---------------|----|---------|---------|--------|----------------|
| Dependent Variable | Stride_length | 46 | 1.99    | 3.37    | 2.5430 | .26680         |



## Goodness of Fit<sup>a</sup>

|                                                                                   | Value |
|-----------------------------------------------------------------------------------|-------|
| Quasi Likelihood under Independence Model Criterion (QIC) <sup>b</sup>            | 8.825 |
| Corrected Quasi Likelihood under Independence Model Criterion (QICC) <sup>b</sup> | 8.464 |

Dependent Variable: Stride\_length  
Model: (Intercept), Terrain, Running,  
Terrain \* Running<sup>a</sup>

- Information criteria are in smaller-is-better form.
- Computed using the full log quasi-likelihood function.

## Tests of Model Effects

| Source            | Wald Chi-Square | Type III |      |
|-------------------|-----------------|----------|------|
|                   |                 | df       | Sig. |
| (Intercept)       | 1678.782        | 1        | .000 |
| Terrain           | 1.362           | 1        | .243 |
| Running           | 2.600           | 1        | .107 |
| Terrain * Running | .269            | 1        | .604 |

Dependent Variable: Stride\_length  
Model: (Intercept), Terrain, Running, Terrain \* Running

### Parameter Estimates

| Parameter                          | B              | Std. Error | 95% Wald Confidence Interval |       | Hypothesis Test |
|------------------------------------|----------------|------------|------------------------------|-------|-----------------|
|                                    |                |            | Lower                        | Upper | Wald Chi-Square |
| (Intercept)                        | .978           | .0423      | .895                         | 1.061 | 533.571         |
| [Terrain=1.00]                     | -.047          | .0320      | -.110                        | .015  | 2.201           |
| [Terrain=2.00]                     | 0 <sup>a</sup> | .          | .                            | .     | .               |
| [Running=1.00]                     | -.044          | .0290      | -.101                        | .013  | 2.266           |
| [Running=2.00]                     | 0 <sup>a</sup> | .          | .                            | .     | .               |
| [Terrain=1.00] *<br>[Running=1.00] | .017           | .0330      | -.048                        | .082  | .269            |
| [Terrain=1.00] *<br>[Running=2.00] | 0 <sup>a</sup> | .          | .                            | .     | .               |
| [Terrain=2.00] *<br>[Running=1.00] | 0 <sup>a</sup> | .          | .                            | .     | .               |
| [Terrain=2.00] *<br>[Running=2.00] | 0 <sup>a</sup> | .          | .                            | .     | .               |
| (Scale)                            | .011           |            |                              |       |                 |

### Parameter Estimates

| Parameter                          | Hypothesis Test |      |
|------------------------------------|-----------------|------|
|                                    | df              | Sig. |
| (Intercept)                        | 1               | .000 |
| [Terrain=1.00]                     | 1               | .138 |
| [Terrain=2.00]                     | .               | .    |
| [Running=1.00]                     | 1               | .132 |
| [Running=2.00]                     | .               | .    |
| [Terrain=1.00] *<br>[Running=1.00] | 1               | .604 |
| [Terrain=1.00] *<br>[Running=2.00] | .               | .    |
| [Terrain=2.00] *<br>[Running=1.00] | .               | .    |
| [Terrain=2.00] *<br>[Running=2.00] | .               | .    |
| (Scale)                            |                 |      |

Dependent Variable: Stride\_length

Model: (Intercept), Terrain, Running, Terrain \* Running

a. Set to zero because this parameter is redundant.

### Estimated Marginal Means 1: Terrain

### Estimates

| Terrain   | Mean   | Std. Error | 95% Wald Confidence Interval |        |
|-----------|--------|------------|------------------------------|--------|
|           |        |            | Lower                        | Upper  |
| Regular   | 2.5019 | .04943     | 2.4069                       | 2.6007 |
| Irregular | 2.6012 | .09051     | 2.4297                       | 2.7848 |

### Pairwise Comparisons

| (I) Terrain | (J) Terrain | Mean Difference (I-J) | Std. Error | df | Bonferroni Sig. | 95% Wald Confidence ... |
|-------------|-------------|-----------------------|------------|----|-----------------|-------------------------|
|             |             |                       |            |    |                 | Lower                   |
| Regular     | Irregular   | -.0993                | .08634     | 1  | .250            | -.2685                  |
| Irregular   | Regular     | .0993                 | .08634     | 1  | .250            | -.0699                  |

### Pairwise Comparisons

| (I) Terrain | (J) Terrain | 95% Wald Confidence ... |
|-------------|-------------|-------------------------|
|             |             | Upper                   |
| Regular     | Irregular   | .0699                   |
| Irregular   | Regular     | .2685                   |

Pairwise comparisons of estimated marginal means based on the original scale of dependent variable Stride\_length

### Overall Test Results

| Wald Chi-Square | df | Sig. |
|-----------------|----|------|
| 1.323           | 1  | .250 |

The Wald chi-square tests the effect of Terrain. This test is based on the linearly independent pairwise comparisons among the estimated marginal means.

## Estimated Marginal Means 2: Running

### Estimates

| Running | Mean   | Std. Error | 95% Wald Confidence Interval |        |
|---------|--------|------------|------------------------------|--------|
|         |        |            | Lower                        | Upper  |
| Free    | 2.5066 | .05346     | 2.4040                       | 2.6136 |
| Nordic  | 2.5963 | .07469     | 2.4540                       | 2.7469 |

### Pairwise Comparisons

| (I) Running | (J) Running | Mean Difference (I-J) | Std. Error | df | Bonferroni Sig. | 95% Wald Confidence ...<br>Lower |
|-------------|-------------|-----------------------|------------|----|-----------------|----------------------------------|
| Free        | Nordic      | -.0897                | .05641     | 1  | .112            | -.2002                           |
| Nordic      | Free        | .0897                 | .05641     | 1  | .112            | -.0209                           |

### Pairwise Comparisons

| (I) Running | (J) Running | 95% Wald Confidence ...<br>Upper |
|-------------|-------------|----------------------------------|
| Free        | Nordic      | .0209                            |
| Nordic      | Free        | .2002                            |

Pairwise comparisons of estimated marginal means based on the original scale of dependent variable Stride\_length

### Overall Test Results

| Wald Chi-Square | df | Sig. |
|-----------------|----|------|
| 2.526           | 1  | .112 |

The Wald chi-square tests the effect of Running. This test is based on the linearly independent pairwise comparisons among the estimated marginal means.

### Estimated Marginal Means 3: Terrain\* Running

#### Estimates

| Terrain   | Running | Mean   | Std. Error | 95% Wald Confidence Interval |        |
|-----------|---------|--------|------------|------------------------------|--------|
|           |         |        |            | Lower                        | Upper  |
| Regular   | Free    | 2.4689 | .06677     | 2.3414                       | 2.6032 |
|           | Nordic  | 2.5354 | .04911     | 2.4409                       | 2.6335 |
| Irregular | Free    | 2.5450 | .08249     | 2.3884                       | 2.7119 |
|           | Nordic  | 2.6587 | .11255     | 2.4470                       | 2.8887 |

### Pairwise Comparisons

| (I) Running*Terrain           | (J) Running*Terrain           | Mean Difference (I-J) | Std. Error | df |
|-------------------------------|-------------------------------|-----------------------|------------|----|
| [Running=1.00]*[Terrain=1.00] | [Running=1.00]*[Terrain=2.00] | -.0762                | .10501     | 1  |
|                               | [Running=2.00]*[Terrain=1.00] | -.0665                | .06342     | 1  |
|                               | [Running=2.00]*[Terrain=2.00] | -.1898                | .12374     | 1  |
| [Running=1.00]*[Terrain=2.00] | [Running=1.00]*[Terrain=1.00] | .0762                 | .10501     | 1  |
|                               | [Running=2.00]*[Terrain=1.00] | .0096                 | .07747     | 1  |
|                               | [Running=2.00]*[Terrain=2.00] | -.1137                | .07706     | 1  |
| [Running=2.00]*[Terrain=1.00] | [Running=1.00]*[Terrain=1.00] | .0665                 | .06342     | 1  |
|                               | [Running=1.00]*[Terrain=2.00] | -.0096                | .07747     | 1  |
|                               | [Running=2.00]*[Terrain=2.00] | -.1233                | .08587     | 1  |
| [Running=2.00]*[Terrain=2.00] | [Running=1.00]*[Terrain=1.00] | .1898                 | .12374     | 1  |
|                               | [Running=1.00]*[Terrain=2.00] | .1137                 | .07706     | 1  |
|                               | [Running=2.00]*[Terrain=1.00] | .1233                 | .08587     | 1  |

### Pairwise Comparisons

| (I) Running*Terrain           | (J) Running*Terrain           | Bonferroni Sig. | 95% Wald Confidence ...<br>Lower |
|-------------------------------|-------------------------------|-----------------|----------------------------------|
| [Running=1.00]*[Terrain=1.00] | [Running=1.00]*[Terrain=2.00] | 1.000           | -.3532                           |
|                               | [Running=2.00]*[Terrain=1.00] | 1.000           | -.2339                           |
|                               | [Running=2.00]*[Terrain=2.00] | .750            | -.5163                           |
| [Running=1.00]*[Terrain=2.00] | [Running=1.00]*[Terrain=1.00] | 1.000           | -.2009                           |
|                               | [Running=2.00]*[Terrain=1.00] | 1.000           | -.1948                           |
|                               | [Running=2.00]*[Terrain=2.00] | .841            | -.3170                           |
| [Running=2.00]*[Terrain=1.00] | [Running=1.00]*[Terrain=1.00] | 1.000           | -.1008                           |
|                               | [Running=1.00]*[Terrain=2.00] | 1.000           | -.2140                           |
|                               | [Running=2.00]*[Terrain=2.00] | .907            | -.3498                           |
| [Running=2.00]*[Terrain=2.00] | [Running=1.00]*[Terrain=1.00] | .750            | -.1367                           |
|                               | [Running=1.00]*[Terrain=2.00] | .841            | -.0896                           |
|                               | [Running=2.00]*[Terrain=1.00] | .907            | -.1033                           |

## Pairwise Comparisons

|                               |                               | 95% Wald<br>Confidence ... |
|-------------------------------|-------------------------------|----------------------------|
| (I) Running*Terrain           | (J) Running*Terrain           | Upper                      |
| [Running=1.00]*[Terrain=1.00] | [Running=1.00]*[Terrain=2.00] | .2009                      |
|                               | [Running=2.00]*[Terrain=1.00] | .1008                      |
|                               | [Running=2.00]*[Terrain=2.00] | .1367                      |
| [Running=1.00]*[Terrain=2.00] | [Running=1.00]*[Terrain=1.00] | .3532                      |
|                               | [Running=2.00]*[Terrain=1.00] | .2140                      |
|                               | [Running=2.00]*[Terrain=2.00] | .0896                      |
| [Running=2.00]*[Terrain=1.00] | [Running=1.00]*[Terrain=1.00] | .2339                      |
|                               | [Running=1.00]*[Terrain=2.00] | .1948                      |
|                               | [Running=2.00]*[Terrain=2.00] | .1033                      |
| [Running=2.00]*[Terrain=2.00] | [Running=1.00]*[Terrain=1.00] | .5163                      |
|                               | [Running=1.00]*[Terrain=2.00] | .3170                      |
|                               | [Running=2.00]*[Terrain=1.00] | .3498                      |

Pairwise comparisons of estimated marginal means based on the original scale of dependent variable Stride\_length

### Overall Test Results

| Wald Chi-Square | df | Sig. |
|-----------------|----|------|
| 2.951           | 3  | .399 |

The Wald chi-square tests the effect of Running\*Terrain. This test is based on the linearly independent pairwise comparisons among the estimated marginal means.

```
GENLIN Stance_phase_RightBY Terrain Running (ORDER=ASCENDING)
  /MODEL Terrain Running Terrain*Running INTERCEPT=YES
DISTRIBUTION=GAMMA LINK=LOG
```

```

/CRITERIA SCALE=MLE PCONVERGE=1E-006(ABSOLUTE) SINGULAR=1E-012 ANALYSISTY
PE=3(WALD) CILEVEL=95
LIKELIHOOD=FULL
/EMMEANS TABLES=Terrain SCALE=ORIGINAL COMPARE=Terrain CONTRAST=PAIRWISE
PADJUST=BONFERRONI
/EMMEANS TABLES=Running SCALE=ORIGINAL COMPARE=Running CONTRAST=PAIRWISE
PADJUST=BONFERRONI
/EMMEANS TABLES=Terrain*Running SCALE=ORIGINAL COMPARE=Running*Terrain CO
NTRAST=PAIRWISE
PADJUST=BONFERRONI
/REPEATED SUBJECT=Subject SORT=YES CORRTYPE=INDEPENDENT ADJUSTCORR=YES CO
VB=ROBUST
/MISSING CLASSMISSING=EXCLUDE
/PRINT CPS DESCRIPTIVES MODELINFO FIT SUMMARY SOLUTION.

```

## Generalized Linear Models

### Notes

|                        |                                |                                                                                                                                        |
|------------------------|--------------------------------|----------------------------------------------------------------------------------------------------------------------------------------|
| Output Created         |                                | 30-OCT-2023 12:24:28                                                                                                                   |
| Comments               |                                |                                                                                                                                        |
| Input                  | Data                           | C:<br>\Users\andre\Documents\<br>Andre\Pesquisa\Artigos<br>para Publicar\Nordic<br>Running\Data\Statistics\S<br>PSS\Spatiotemporal.sav |
|                        | Active Dataset                 | DataSet1                                                                                                                               |
|                        | Filter                         | <none>                                                                                                                                 |
|                        | Weight                         | <none>                                                                                                                                 |
|                        | Split File                     | <none>                                                                                                                                 |
|                        | N of Rows in Working Data File | 49                                                                                                                                     |
| Missing Value Handling | Definition of Missing          | User-defined missing values for factor, subject and within-subject variables are treated as missing.                                   |
|                        | Cases Used                     | Statistics are based on cases with valid data for all variables in the model.                                                          |
| Weight Handling        |                                | not applicable                                                                                                                         |



## Notes

|           |                                                                                                                                                                                                                                                                                                                                                                                                                                                                                                                                                                                                                                                                                                                                                                        |             |
|-----------|------------------------------------------------------------------------------------------------------------------------------------------------------------------------------------------------------------------------------------------------------------------------------------------------------------------------------------------------------------------------------------------------------------------------------------------------------------------------------------------------------------------------------------------------------------------------------------------------------------------------------------------------------------------------------------------------------------------------------------------------------------------------|-------------|
| Syntax    | <pre> GENLIN Stance_phase_Right BY Terrain Running (ORDER=ASCENDING)  /MODEL Terrain Running Terrain*Running INTERCEPT=YES DISTRIBUTION=GAMMA LINK=LOG  /CRITERIA SCALE=MLE PCONVERGE=1E-006 (ABSOLUTE) SINGULAR=1E-012 ANALYSISTYPE=3 (WALD) CILEVEL=95 LIKELIHOOD=FULL  /EMMEANS TABLES=Terrain SCALE=ORIGINAL COMPARE=Terrain CONTRAST=PAIRWISE PADJUST=BONFERRONI  /EMMEANS TABLES=Running SCALE=ORIGINAL COMPARE=Running CONTRAST=PAIRWISE PADJUST=BONFERRONI  /EMMEANS TABLES=Terrain*Running SCALE=ORIGINAL COMPARE=Running*Terr ain CONTRAST=PAIRWISE  PADJUST=BONFERRONI  /REPEATED SUBJECT=Subject SORT=YES CORRTYPE=INDEPEND ENT ADJUSTCORR=YES COVB=ROBUST  /MISSING CLASSMISSING=EXCLU DE  /PRINT CPS DESCRIPTIVES MODELINFO FIT SUMMARY SOLUTION. </pre> |             |
| Resources | Processor Time                                                                                                                                                                                                                                                                                                                                                                                                                                                                                                                                                                                                                                                                                                                                                         | 00:00:00.06 |
|           | Elapsed Time                                                                                                                                                                                                                                                                                                                                                                                                                                                                                                                                                                                                                                                                                                                                                           | 00:00:00.07 |

### Model Information

|                                      |                    |
|--------------------------------------|--------------------|
| Dependent Variable                   | Stance_phase_Right |
| Probability Distribution             | Gamma              |
| Link Function                        | Log                |
| Subject Effect 1                     | Subject            |
| Working Correlation Matrix Structure | Independent        |

### Case Processing Summary

|          | N  | Percent |
|----------|----|---------|
| Included | 48 | 98.0%   |
| Excluded | 1  | 2.0%    |
| Total    | 49 | 100.0%  |

### Correlated Data Summary

|                                    |                |         |    |
|------------------------------------|----------------|---------|----|
| Number of Levels                   | Subject Effect | Subject | 13 |
| Number of Subjects                 |                |         | 13 |
| Number of Measurements per Subject | Minimum        |         | 2  |
|                                    | Maximum        |         | 4  |
| Correlation Matrix Dimension       |                |         | 4  |

### Categorical Variable Information

|        |         |           | N  | Percent |
|--------|---------|-----------|----|---------|
| Factor | Terrain | Regular   | 26 | 54.2%   |
|        |         | Irregular | 22 | 45.8%   |
|        |         | Total     | 48 | 100.0%  |
|        | Running | Free      | 24 | 50.0%   |
|        |         | Nordic    | 24 | 50.0%   |
|        |         | Total     | 48 | 100.0%  |

### Continuous Variable Information

|                    |                    | N  | Minimum | Maximum | Mean    |
|--------------------|--------------------|----|---------|---------|---------|
| Dependent Variable | Stance_phase_Right | 48 | 24.67   | 37.63   | 32.1414 |

### Continuous Variable Information

|                    |                    | Std. Deviation |
|--------------------|--------------------|----------------|
| Dependent Variable | Stance_phase_Right | 2.83687        |

### Goodness of Fit<sup>a</sup>

|                                                                                   | Value |
|-----------------------------------------------------------------------------------|-------|
| Quasi Likelihood under Independence Model Criterion (QIC) <sup>b</sup>            | 8.317 |
| Corrected Quasi Likelihood under Independence Model Criterion (QICC) <sup>b</sup> | 8.366 |

Dependent Variable:

Stance\_phase\_Right

Model: (Intercept), Terrain, Running,

Terrain \* Running<sup>a</sup>

a. Information criteria are in smaller-is-better form.

b. Computed using the full log quasi-likelihood function.

### Tests of Model Effects

| Source            | Wald Chi-Square | Type III |      |
|-------------------|-----------------|----------|------|
|                   |                 | df       | Sig. |
| (Intercept)       | 23996.944       | 1        | .000 |
| Terrain           | 2.133           | 1        | .144 |
| Running           | .169            | 1        | .681 |
| Terrain * Running | .407            | 1        | .523 |

Dependent Variable: Stance\_phase\_Right

Model: (Intercept), Terrain, Running, Terrain \* Running

### Parameter Estimates

| Parameter                          | B              | Std. Error | 95% Wald Confidence Interval |       | Hypothesis Test |
|------------------------------------|----------------|------------|------------------------------|-------|-----------------|
|                                    |                |            | Lower                        | Upper | Wald Chi-Square |
| (Intercept)                        | 3.453          | .0265      | 3.401                        | 3.504 | 17035.563       |
| [Terrain=1.00]                     | .027           | .0176      | -.007                        | .061  | 2.364           |
| [Terrain=2.00]                     | 0 <sup>a</sup> | .          | .                            | .     | .               |
| [Running=1.00]                     | .013           | .0176      | -.021                        | .048  | .557            |
| [Running=2.00]                     | 0 <sup>a</sup> | .          | .                            | .     | .               |
| [Terrain=1.00] *<br>[Running=1.00] | -.013          | .0210      | -.055                        | .028  | .407            |
| [Terrain=1.00] *<br>[Running=2.00] | 0 <sup>a</sup> | .          | .                            | .     | .               |
| [Terrain=2.00] *<br>[Running=1.00] | 0 <sup>a</sup> | .          | .                            | .     | .               |
| [Terrain=2.00] *<br>[Running=2.00] | 0 <sup>a</sup> | .          | .                            | .     | .               |
| (Scale)                            | .008           |            |                              |       |                 |

### Parameter Estimates

| Parameter                          | Hypothesis Test |      |
|------------------------------------|-----------------|------|
|                                    | df              | Sig. |
| (Intercept)                        | 1               | .000 |
| [Terrain=1.00]                     | 1               | .124 |
| [Terrain=2.00]                     | .               | .    |
| [Running=1.00]                     | 1               | .456 |
| [Running=2.00]                     | .               | .    |
| [Terrain=1.00] *<br>[Running=1.00] | 1               | .523 |
| [Terrain=1.00] *<br>[Running=2.00] | .               | .    |
| [Terrain=2.00] *<br>[Running=1.00] | .               | .    |
| [Terrain=2.00] *<br>[Running=2.00] | .               | .    |
| (Scale)                            |                 |      |

Dependent Variable: Stance\_phase\_Right

Model: (Intercept), Terrain, Running, Terrain \* Running

a. Set to zero because this parameter is redundant.

### Estimated Marginal Means 1: Terrain

### Estimates

| Terrain   | Mean    | Std. Error | 95% Wald Confidence Interval |         |
|-----------|---------|------------|------------------------------|---------|
|           |         |            | Lower                        | Upper   |
| Regular   | 32.4399 | .67735     | 31.1391                      | 33.7950 |
| Irregular | 31.7879 | .81895     | 30.2226                      | 33.4342 |

### Pairwise Comparisons

| (I) Terrain | (J) Terrain | Mean Difference (I-J) | Std. Error | df | Bonferroni Sig. | 95% Wald Confidence ... |
|-------------|-------------|-----------------------|------------|----|-----------------|-------------------------|
|             |             |                       |            |    |                 | Lower                   |
| Regular     | Irregular   | .6520                 | .44130     | 1  | .140            | -.2129                  |
| Irregular   | Regular     | -.6520                | .44130     | 1  | .140            | -1.5169                 |

### Pairwise Comparisons

| (I) Terrain | (J) Terrain | 95% Wald Confidence ... |
|-------------|-------------|-------------------------|
|             |             | Upper                   |
| Regular     | Irregular   | 1.5169                  |
| Irregular   | Regular     | .2129                   |

Pairwise comparisons of estimated marginal means based on the original scale of dependent variable Stance\_phase\_Right

### Overall Test Results

| Wald Chi-Square | df | Sig. |
|-----------------|----|------|
| 2.183           | 1  | .140 |

The Wald chi-square tests the effect of Terrain. This test is based on the linearly independent pairwise comparisons among the estimated marginal means.

## Estimated Marginal Means 2: Running

### Estimates

| Running | Mean    | Std. Error | 95% Wald Confidence Interval |         |
|---------|---------|------------|------------------------------|---------|
|         |         |            | Lower                        | Upper   |
| Free    | 32.2159 | .72629     | 30.8234                      | 33.6713 |
| Nordic  | 32.0089 | .79557     | 30.4870                      | 33.6068 |

### Pairwise Comparisons

| (I) Running | (J) Running | Mean Difference (I-J) | Std. Error | df | Bonferroni Sig. | 95% Wald Confidence ...<br>Lower |
|-------------|-------------|-----------------------|------------|----|-----------------|----------------------------------|
| Free        | Nordic      | .2070                 | .50278     | 1  | .681            | -.7784                           |
| Nordic      | Free        | -.2070                | .50278     | 1  | .681            | -1.1924                          |

### Pairwise Comparisons

| (I) Running | (J) Running | 95% Wald Confidence ...<br>Upper |
|-------------|-------------|----------------------------------|
| Free        | Nordic      | 1.1924                           |
| Nordic      | Free        | .7784                            |

Pairwise comparisons of estimated marginal means based on the original scale of dependent variable Stance\_phase\_Right

### Overall Test Results

| Wald Chi-Square | df | Sig. |
|-----------------|----|------|
| .170            | 1  | .681 |

The Wald chi-square tests the effect of Running. This test is based on the linearly independent pairwise comparisons among the estimated marginal means.

### Estimated Marginal Means 3: Terrain\* Running

#### Estimates

| Terrain   | Running | Mean    | Std. Error | 95% Wald Confidence Interval |         |
|-----------|---------|---------|------------|------------------------------|---------|
|           |         |         |            | Lower                        | Upper   |
| Regular   | Free    | 32.4358 | .63464     | 31.2155                      | 33.7039 |
|           | Nordic  | 32.4439 | .85225     | 30.8158                      | 34.1581 |
| Irregular | Free    | 31.9974 | .89527     | 30.2900                      | 33.8011 |
|           | Nordic  | 31.5797 | .83534     | 29.9842                      | 33.2601 |

### Pairwise Comparisons

| (I) Running*Terrain           | (J) Running*Terrain           | Mean Difference (I-J) | Std. Error | df |
|-------------------------------|-------------------------------|-----------------------|------------|----|
| [Running=1.00]*[Terrain=1.00] | [Running=1.00]*[Terrain=2.00] | .4384                 | .55146     | 1  |
|                               | [Running=2.00]*[Terrain=1.00] | -.0081                | .65029     | 1  |
|                               | [Running=2.00]*[Terrain=2.00] | .8562                 | .72996     | 1  |
| [Running=1.00]*[Terrain=2.00] | [Running=1.00]*[Terrain=1.00] | -.4384                | .55146     | 1  |
|                               | [Running=2.00]*[Terrain=1.00] | -.4465                | .60168     | 1  |
|                               | [Running=2.00]*[Terrain=2.00] | .4178                 | .56093     | 1  |
| [Running=2.00]*[Terrain=1.00] | [Running=1.00]*[Terrain=1.00] | .0081                 | .65029     | 1  |
|                               | [Running=1.00]*[Terrain=2.00] | .4465                 | .60168     | 1  |
|                               | [Running=2.00]*[Terrain=2.00] | .8643                 | .56236     | 1  |
| [Running=2.00]*[Terrain=2.00] | [Running=1.00]*[Terrain=1.00] | -.8562                | .72996     | 1  |
|                               | [Running=1.00]*[Terrain=2.00] | -.4178                | .56093     | 1  |
|                               | [Running=2.00]*[Terrain=1.00] | -.8643                | .56236     | 1  |

### Pairwise Comparisons

| (I) Running*Terrain           | (J) Running*Terrain           | Bonferroni Sig. | 95% Wald Confidence ...<br>Lower |
|-------------------------------|-------------------------------|-----------------|----------------------------------|
| [Running=1.00]*[Terrain=1.00] | [Running=1.00]*[Terrain=2.00] | 1.000           | -1.0165                          |
|                               | [Running=2.00]*[Terrain=1.00] | 1.000           | -1.7237                          |
|                               | [Running=2.00]*[Terrain=2.00] | 1.000           | -1.0696                          |
| [Running=1.00]*[Terrain=2.00] | [Running=1.00]*[Terrain=1.00] | 1.000           | -1.8933                          |
|                               | [Running=2.00]*[Terrain=1.00] | 1.000           | -2.0339                          |
|                               | [Running=2.00]*[Terrain=2.00] | 1.000           | -1.0621                          |
| [Running=2.00]*[Terrain=1.00] | [Running=1.00]*[Terrain=1.00] | 1.000           | -1.7075                          |
|                               | [Running=1.00]*[Terrain=2.00] | 1.000           | -1.1409                          |
|                               | [Running=2.00]*[Terrain=2.00] | .746            | -.6194                           |
| [Running=2.00]*[Terrain=2.00] | [Running=1.00]*[Terrain=1.00] | 1.000           | -2.7820                          |
|                               | [Running=1.00]*[Terrain=2.00] | 1.000           | -1.8976                          |
|                               | [Running=2.00]*[Terrain=1.00] | .746            | -2.3479                          |



### Pairwise Comparisons

| (I) Running*Terrain           | (J) Running*Terrain           | 95% Wald Confidence ...<br>Upper |
|-------------------------------|-------------------------------|----------------------------------|
| [Running=1.00]*[Terrain=1.00] | [Running=1.00]*[Terrain=2.00] | 1.8933                           |
|                               | [Running=2.00]*[Terrain=1.00] | 1.7075                           |
|                               | [Running=2.00]*[Terrain=2.00] | 2.7820                           |
| [Running=1.00]*[Terrain=2.00] | [Running=1.00]*[Terrain=1.00] | 1.0165                           |
|                               | [Running=2.00]*[Terrain=1.00] | 1.1409                           |
|                               | [Running=2.00]*[Terrain=2.00] | 1.8976                           |
| [Running=2.00]*[Terrain=1.00] | [Running=1.00]*[Terrain=1.00] | 1.7237                           |
|                               | [Running=1.00]*[Terrain=2.00] | 2.0339                           |
|                               | [Running=2.00]*[Terrain=2.00] | 2.3479                           |
| [Running=2.00]*[Terrain=2.00] | [Running=1.00]*[Terrain=1.00] | 1.0696                           |
|                               | [Running=1.00]*[Terrain=2.00] | 1.0621                           |
|                               | [Running=2.00]*[Terrain=1.00] | .6194                            |

Pairwise comparisons of estimated marginal means based on the original scale of dependent variable Stance\_phase\_Right

### Overall Test Results

| Wald Chi-Square | df | Sig. |
|-----------------|----|------|
| 2.589           | 3  | .459 |

The Wald chi-square tests the effect of Running\*Terrain. This test is based on the linearly independent pairwise comparisons among the estimated marginal means.

```
GENLIN Swing_phase_Right BY Terrain Running (ORDER=ASCENDING)
  /MODEL Terrain Running Terrain*Running INTERCEPT=YES
DISTRIBUTION=GAMMA LINK=LOG
```

```

/CRITERIA SCALE=MLE PCONVERGE=1E-006(ABSOLUTE) SINGULAR=1E-012 ANALYSISTY
PE=3(WALD) CILEVEL=95
LIKELIHOOD=FULL
/EMMEANS TABLES=Terrain SCALE=ORIGINAL COMPARE=Terrain CONTRAST=PAIRWISE
PADJUST=BONFERRONI
/EMMEANS TABLES=Running SCALE=ORIGINAL COMPARE=Running CONTRAST=PAIRWISE
PADJUST=BONFERRONI
/EMMEANS TABLES=Terrain*Running SCALE=ORIGINAL COMPARE=Running*Terrain CO
NTRAST=PAIRWISE
PADJUST=BONFERRONI
/REPEATED SUBJECT=Subject SORT=YES CORRTYPE=INDEPENDENT ADJUSTCORR=YES CO
VB=ROBUST
/MISSING CLASSMISSING=EXCLUDE
/PRINT CPS DESCRIPTIVES MODELINFO FIT SUMMARY SOLUTION.

```

## Generalized Linear Models

### Notes

|                        |                                |                                                                                                                                        |
|------------------------|--------------------------------|----------------------------------------------------------------------------------------------------------------------------------------|
| Output Created         |                                | 30-OCT-2023 12:25:38                                                                                                                   |
| Comments               |                                |                                                                                                                                        |
| Input                  | Data                           | C:<br>\Users\andre\Documents\<br>Andre\Pesquisa\Artigos<br>para Publicar\Nordic<br>Running\Data\Statistics\S<br>PSS\Spatiotemporal.sav |
|                        | Active Dataset                 | DataSet1                                                                                                                               |
|                        | Filter                         | <none>                                                                                                                                 |
|                        | Weight                         | <none>                                                                                                                                 |
|                        | Split File                     | <none>                                                                                                                                 |
|                        | N of Rows in Working Data File | 49                                                                                                                                     |
| Missing Value Handling | Definition of Missing          | User-defined missing values for factor, subject and within-subject variables are treated as missing.                                   |
|                        | Cases Used                     | Statistics are based on cases with valid data for all variables in the model.                                                          |
| Weight Handling        |                                | not applicable                                                                                                                         |

## Notes

|           |                                                                                                                                                                                                                                                                                                                                                                                                                                                                                                                                                                                                                                                                                                                                                                       |             |
|-----------|-----------------------------------------------------------------------------------------------------------------------------------------------------------------------------------------------------------------------------------------------------------------------------------------------------------------------------------------------------------------------------------------------------------------------------------------------------------------------------------------------------------------------------------------------------------------------------------------------------------------------------------------------------------------------------------------------------------------------------------------------------------------------|-------------|
| Syntax    | <pre> GENLIN Swing_phase_Right BY Terrain Running (ORDER=ASCENDING)  /MODEL Terrain Running Terrain*Running INTERCEPT=YES DISTRIBUTION=GAMMA LINK=LOG  /CRITERIA SCALE=MLE PCONVERGE=1E-006 (ABSOLUTE) SINGULAR=1E-012 ANALYSISTYPE=3 (WALD) CILEVEL=95 LIKELIHOOD=FULL  /EMMEANS TABLES=Terrain SCALE=ORIGINAL COMPARE=Terrain CONTRAST=PAIRWISE PADJUST=BONFERRONI  /EMMEANS TABLES=Running SCALE=ORIGINAL COMPARE=Running CONTRAST=PAIRWISE PADJUST=BONFERRONI  /EMMEANS TABLES=Terrain*Running SCALE=ORIGINAL COMPARE=Running*Terr ain CONTRAST=PAIRWISE  PADJUST=BONFERRONI  /REPEATED SUBJECT=Subject SORT=YES CORRTYPE=INDEPEND ENT ADJUSTCORR=YES COVB=ROBUST  /MISSING CLASSMISSING=EXCLU DE  /PRINT CPS DESCRIPTIVES MODELINFO FIT SUMMARY SOLUTION. </pre> |             |
| Resources | Processor Time                                                                                                                                                                                                                                                                                                                                                                                                                                                                                                                                                                                                                                                                                                                                                        | 00:00:00.06 |
|           | Elapsed Time                                                                                                                                                                                                                                                                                                                                                                                                                                                                                                                                                                                                                                                                                                                                                          | 00:00:00.06 |

### Model Information

|                                      |                   |
|--------------------------------------|-------------------|
| Dependent Variable                   | Swing_phase_Right |
| Probability Distribution             | Gamma             |
| Link Function                        | Log               |
| Subject Effect 1                     | Subject           |
| Working Correlation Matrix Structure | Independent       |

### Case Processing Summary

|          | N  | Percent |
|----------|----|---------|
| Included | 48 | 98.0%   |
| Excluded | 1  | 2.0%    |
| Total    | 49 | 100.0%  |

### Correlated Data Summary

|                                    |                |         |    |
|------------------------------------|----------------|---------|----|
| Number of Levels                   | Subject Effect | Subject | 13 |
| Number of Subjects                 |                |         | 13 |
| Number of Measurements per Subject | Minimum        |         | 2  |
|                                    | Maximum        |         | 4  |
| Correlation Matrix Dimension       |                |         | 4  |

### Categorical Variable Information

|        |         |           | N  | Percent |
|--------|---------|-----------|----|---------|
| Factor | Terrain | Regular   | 26 | 54.2%   |
|        |         | Irregular | 22 | 45.8%   |
|        |         | Total     | 48 | 100.0%  |
|        | Running | Free      | 24 | 50.0%   |
|        |         | Nordic    | 24 | 50.0%   |
|        |         | Total     | 48 | 100.0%  |

### Continuous Variable Information

|                    |                   | N  | Minimum | Maximum | Mean    |
|--------------------|-------------------|----|---------|---------|---------|
| Dependent Variable | Swing_phase_Right | 48 | 62.37   | 75.33   | 67.8586 |

### Continuous Variable Information

|                    |                   | Std. Deviation |
|--------------------|-------------------|----------------|
| Dependent Variable | Swing_phase_Right | 2.83687        |

### Goodness of Fit<sup>a</sup>

|                                                                                   | Value |
|-----------------------------------------------------------------------------------|-------|
| Quasi Likelihood under Independence Model Criterion (QIC) <sup>b</sup>            | 8.110 |
| Corrected Quasi Likelihood under Independence Model Criterion (QICC) <sup>b</sup> | 8.081 |

Dependent Variable:

Swing\_phase\_Right

Model: (Intercept), Terrain, Running,

Terrain \* Running<sup>a</sup>

a. Information criteria are in smaller-is-better form.

b. Computed using the full log quasi-likelihood function.

### Tests of Model Effects

| Source            | Wald Chi-Square | Type III |      |
|-------------------|-----------------|----------|------|
|                   |                 | df       | Sig. |
| (Intercept)       | 158902.131      | 1        | .000 |
| Terrain           | 2.204           | 1        | .138 |
| Running           | .164            | 1        | .685 |
| Terrain * Running | .385            | 1        | .535 |

Dependent Variable: Swing\_phase\_Right

Model: (Intercept), Terrain, Running, Terrain \* Running

### Parameter Estimates

| Parameter                          | B              | Std. Error | 95% Wald Confidence Interval |       | Hypothesis Test |
|------------------------------------|----------------|------------|------------------------------|-------|-----------------|
|                                    |                |            | Lower                        | Upper | Wald Chi-Square |
| (Intercept)                        | 4.226          | .0122      | 4.202                        | 4.250 | 119793.056      |
| [Terrain=1.00]                     | -.013          | .0083      | -.029                        | .004  | 2.358           |
| [Terrain=2.00]                     | 0 <sup>a</sup> | .          | .                            | .     | .               |
| [Running=1.00]                     | -.006          | .0082      | -.022                        | .010  | .553            |
| [Running=2.00]                     | 0 <sup>a</sup> | .          | .                            | .     | .               |
| [Terrain=1.00] *<br>[Running=1.00] | .006           | .0101      | -.013                        | .026  | .385            |
| [Terrain=1.00] *<br>[Running=2.00] | 0 <sup>a</sup> | .          | .                            | .     | .               |
| [Terrain=2.00] *<br>[Running=1.00] | 0 <sup>a</sup> | .          | .                            | .     | .               |
| [Terrain=2.00] *<br>[Running=2.00] | 0 <sup>a</sup> | .          | .                            | .     | .               |
| (Scale)                            | .002           |            |                              |       |                 |

### Parameter Estimates

| Parameter                          | Hypothesis Test |      |
|------------------------------------|-----------------|------|
|                                    | df              | Sig. |
| (Intercept)                        | 1               | .000 |
| [Terrain=1.00]                     | 1               | .125 |
| [Terrain=2.00]                     | .               | .    |
| [Running=1.00]                     | 1               | .457 |
| [Running=2.00]                     | .               | .    |
| [Terrain=1.00] *<br>[Running=1.00] | 1               | .535 |
| [Terrain=1.00] *<br>[Running=2.00] | .               | .    |
| [Terrain=2.00] *<br>[Running=1.00] | .               | .    |
| [Terrain=2.00] *<br>[Running=2.00] | .               | .    |
| (Scale)                            |                 |      |

Dependent Variable: Swing\_phase\_Right

Model: (Intercept), Terrain, Running, Terrain \* Running

a. Set to zero because this parameter is redundant.

### Estimated Marginal Means 1: Terrain

### Estimates

| Terrain   | Mean    | Std. Error | 95% Wald Confidence Interval |         |
|-----------|---------|------------|------------------------------|---------|
|           |         |            | Lower                        | Upper   |
| Regular   | 67.5601 | .67737     | 66.2454                      | 68.9009 |
| Irregular | 68.2111 | .81924     | 66.6242                      | 69.8359 |

### Pairwise Comparisons

| (I) Terrain | (J) Terrain | Mean Difference (I-J) | Std. Error | df | Bonferroni Sig. | 95% Wald Confidence ... |
|-------------|-------------|-----------------------|------------|----|-----------------|-------------------------|
|             |             |                       |            |    |                 | Lower                   |
| Regular     | Irregular   | -.6510                | .44078     | 1  | .140            | -1.5149                 |
| Irregular   | Regular     | .6510                 | .44078     | 1  | .140            | -.2129                  |

### Pairwise Comparisons

| (I) Terrain | (J) Terrain | 95% Wald Confidence ... |
|-------------|-------------|-------------------------|
|             |             | Upper                   |
| Regular     | Irregular   | .2129                   |
| Irregular   | Regular     | 1.5149                  |

Pairwise comparisons of estimated marginal means based on the original scale of dependent variable Swing\_phase\_Right

### Overall Test Results

| Wald Chi-Square | df | Sig. |
|-----------------|----|------|
| 2.181           | 1  | .140 |

The Wald chi-square tests the effect of Terrain. This test is based on the linearly independent pairwise comparisons among the estimated marginal means.

## Estimated Marginal Means 2: Running

### Estimates

| Running | Mean    | Std. Error | 95% Wald Confidence Interval |         |
|---------|---------|------------|------------------------------|---------|
|         |         |            | Lower                        | Upper   |
| Free    | 67.7830 | .72489     | 66.3770                      | 69.2188 |
| Nordic  | 67.9868 | .79569     | 66.4451                      | 69.5644 |

### Pairwise Comparisons

| (I) Running | (J) Running | Mean Difference (I-J) | Std. Error | df | Bonferroni Sig. | 95% Wald Confidence ...<br>Lower |
|-------------|-------------|-----------------------|------------|----|-----------------|----------------------------------|
| Free        | Nordic      | -.2038                | .50313     | 1  | .685            | -1.1899                          |
| Nordic      | Free        | .2038                 | .50313     | 1  | .685            | -.7823                           |

### Pairwise Comparisons

| (I) Running | (J) Running | 95% Wald Confidence ...<br>Upper |
|-------------|-------------|----------------------------------|
| Free        | Nordic      | .7823                            |
| Nordic      | Free        | 1.1899                           |

Pairwise comparisons of estimated marginal means based on the original scale of dependent variable Swing\_phase\_Right

### Overall Test Results

| Wald Chi-Square | df | Sig. |
|-----------------|----|------|
| .164            | 1  | .685 |

The Wald chi-square tests the effect of Running. This test is based on the linearly independent pairwise comparisons among the estimated marginal means.

## Estimated Marginal Means 3: Terrain\* Running

### Estimates

| Terrain   | Running | Mean    | Std. Error | 95% Wald Confidence Interval |         |
|-----------|---------|---------|------------|------------------------------|---------|
|           |         |         |            | Lower                        | Upper   |
| Regular   | Free    | 67.5642 | .63464     | 66.3317                      | 68.8196 |
|           | Nordic  | 67.5561 | .85225     | 65.9062                      | 69.2473 |
| Irregular | Free    | 68.0026 | .89527     | 66.2703                      | 69.7801 |
|           | Nordic  | 68.4203 | .83534     | 66.8025                      | 70.0773 |



### Pairwise Comparisons

| (I) Running*Terrain           | (J) Running*Terrain           | Mean Difference (I-J) | Std. Error | df |
|-------------------------------|-------------------------------|-----------------------|------------|----|
| [Running=1.00]*[Terrain=1.00] | [Running=1.00]*[Terrain=2.00] | -.4384                | .55146     | 1  |
|                               | [Running=2.00]*[Terrain=1.00] | .0081                 | .65029     | 1  |
|                               | [Running=2.00]*[Terrain=2.00] | -.8562                | .72996     | 1  |
| [Running=1.00]*[Terrain=2.00] | [Running=1.00]*[Terrain=1.00] | .4384                 | .55146     | 1  |
|                               | [Running=2.00]*[Terrain=1.00] | .4465                 | .60168     | 1  |
|                               | [Running=2.00]*[Terrain=2.00] | -.4178                | .56093     | 1  |
| [Running=2.00]*[Terrain=1.00] | [Running=1.00]*[Terrain=1.00] | -.0081                | .65029     | 1  |
|                               | [Running=1.00]*[Terrain=2.00] | -.4465                | .60168     | 1  |
|                               | [Running=2.00]*[Terrain=2.00] | -.8643                | .56236     | 1  |
| [Running=2.00]*[Terrain=2.00] | [Running=1.00]*[Terrain=1.00] | .8562                 | .72996     | 1  |
|                               | [Running=1.00]*[Terrain=2.00] | .4178                 | .56093     | 1  |
|                               | [Running=2.00]*[Terrain=1.00] | .8643                 | .56236     | 1  |

### Pairwise Comparisons

| (I) Running*Terrain           | (J) Running*Terrain           | Bonferroni Sig. | 95% Wald Confidence ...<br>Lower |
|-------------------------------|-------------------------------|-----------------|----------------------------------|
| [Running=1.00]*[Terrain=1.00] | [Running=1.00]*[Terrain=2.00] | 1.000           | -1.8933                          |
|                               | [Running=2.00]*[Terrain=1.00] | 1.000           | -1.7075                          |
|                               | [Running=2.00]*[Terrain=2.00] | 1.000           | -2.7820                          |
| [Running=1.00]*[Terrain=2.00] | [Running=1.00]*[Terrain=1.00] | 1.000           | -1.0165                          |
|                               | [Running=2.00]*[Terrain=1.00] | 1.000           | -1.1409                          |
|                               | [Running=2.00]*[Terrain=2.00] | 1.000           | -1.8976                          |
| [Running=2.00]*[Terrain=1.00] | [Running=1.00]*[Terrain=1.00] | 1.000           | -1.7237                          |
|                               | [Running=1.00]*[Terrain=2.00] | 1.000           | -2.0339                          |
|                               | [Running=2.00]*[Terrain=2.00] | .746            | -2.3479                          |
| [Running=2.00]*[Terrain=2.00] | [Running=1.00]*[Terrain=1.00] | 1.000           | -1.0696                          |
|                               | [Running=1.00]*[Terrain=2.00] | 1.000           | -1.0621                          |
|                               | [Running=2.00]*[Terrain=1.00] | .746            | -.6194                           |

### Pairwise Comparisons

| (I) Running*Terrain           | (J) Running*Terrain           | 95% Wald Confidence ...<br>Upper |
|-------------------------------|-------------------------------|----------------------------------|
| [Running=1.00]*[Terrain=1.00] | [Running=1.00]*[Terrain=2.00] | 1.0165                           |
|                               | [Running=2.00]*[Terrain=1.00] | 1.7237                           |
|                               | [Running=2.00]*[Terrain=2.00] | 1.0696                           |
| [Running=1.00]*[Terrain=2.00] | [Running=1.00]*[Terrain=1.00] | 1.8933                           |
|                               | [Running=2.00]*[Terrain=1.00] | 2.0339                           |
|                               | [Running=2.00]*[Terrain=2.00] | 1.0621                           |
| [Running=2.00]*[Terrain=1.00] | [Running=1.00]*[Terrain=1.00] | 1.7075                           |
|                               | [Running=1.00]*[Terrain=2.00] | 1.1409                           |
|                               | [Running=2.00]*[Terrain=2.00] | .6194                            |
| [Running=2.00]*[Terrain=2.00] | [Running=1.00]*[Terrain=1.00] | 2.7820                           |
|                               | [Running=1.00]*[Terrain=2.00] | 1.8976                           |
|                               | [Running=2.00]*[Terrain=1.00] | 2.3479                           |

Pairwise comparisons of estimated marginal means based on the original scale of dependent variable Swing\_phase\_Right

### Overall Test Results

| Wald Chi-Square | df | Sig. |
|-----------------|----|------|
| 2.589           | 3  | .459 |

The Wald chi-square tests the effect of Running\*Terrain. This test is based on the linearly independent pairwise comparisons among the estimated marginal means.

## COORDINATION VARIABLES

```

GENLIN PCI BY Terrain Running (ORDER=ASCENDING)
  /MODEL Terrain Running Terrain*Running INTERCEPT=YES
DISTRIBUTION=GAMMA LINK=LOG
  /CRITERIA SCALE=MLE PCONVERGE=1E-006(ABSOLUTE) SINGULAR=1E-012 ANALYSISTY
PE=3(WALD) CILEVEL=95
  LIKELIHOOD=FULL
  /EMMEANS TABLES=Terrain SCALE=ORIGINAL COMPARE=Terrain CONTRAST=PAIRWISE
PADJUST=BONFERRONI
  /EMMEANS TABLES=Running SCALE=ORIGINAL COMPARE=Running CONTRAST=PAIRWISE
PADJUST=BONFERRONI
  /EMMEANS TABLES=Terrain*Running SCALE=ORIGINAL COMPARE=Running*Terrain CO
NTRAST=PAIRWISE
  PADJUST=BONFERRONI
  /REPEATED SUBJECT=Subject SORT=YES CORRTYPE=INDEPENDENT ADJUSTCORR=YES CO
VB=ROBUST
  /MISSING CLASSMISSING=EXCLUDE

```

## Generalized Linear Models

### Notes

|                        |                                |                                                                                                                                        |
|------------------------|--------------------------------|----------------------------------------------------------------------------------------------------------------------------------------|
| Output Created         |                                | 30-OCT-2023 12:26:24                                                                                                                   |
| Comments               |                                |                                                                                                                                        |
| Input                  | Data                           | C:<br>\Users\andre\Documents\<br>Andre\Pesquisa\Artigos<br>para Publicar\Nordic<br>Running\Data\Statistics\S<br>PSS\Spatiotemporal.sav |
|                        | Active Dataset                 | DataSet1                                                                                                                               |
|                        | Filter                         | <none>                                                                                                                                 |
|                        | Weight                         | <none>                                                                                                                                 |
|                        | Split File                     | <none>                                                                                                                                 |
|                        | N of Rows in Working Data File | 49                                                                                                                                     |
| Missing Value Handling | Definition of Missing          | User-defined missing values for factor, subject and within-subject variables are treated as missing.                                   |
|                        | Cases Used                     | Statistics are based on cases with valid data for all variables in the model.                                                          |
| Weight Handling        |                                | not applicable                                                                                                                         |

## Notes

|           |                                                                                                                                                                                                                                                                                                                                                                                                                                                                                                                                                                                                                                                                                                                                                      |             |
|-----------|------------------------------------------------------------------------------------------------------------------------------------------------------------------------------------------------------------------------------------------------------------------------------------------------------------------------------------------------------------------------------------------------------------------------------------------------------------------------------------------------------------------------------------------------------------------------------------------------------------------------------------------------------------------------------------------------------------------------------------------------------|-------------|
| Syntax    | <pre> GENLIN PCI BY Terrain Running (ORDER=ASCENDING)  /MODEL Terrain Running Terrain*Running INTERCEPT=YES DISTRIBUTION=GAMMA LINK=LOG  /CRITERIA SCALE=MLE PCONVERGE=1E-006 (ABSOLUTE) SINGULAR=1E-012 ANALYSISTYPE=3 (WALD) CILEVEL=95 LIKELIHOOD=FULL  /EMMEANS TABLES=Terrain SCALE=ORIGINAL COMPARE=Terrain CONTRAST=PAIRWISE PADJUST=BONFERRONI  /EMMEANS TABLES=Running SCALE=ORIGINAL COMPARE=Running CONTRAST=PAIRWISE PADJUST=BONFERRONI  /EMMEANS TABLES=Terrain*Running SCALE=ORIGINAL COMPARE=Running*Terrain CONTRAST=PAIRWISE  PADJUST=BONFERRONI  /REPEATED SUBJECT=Subject SORT=YES CORRTYPE=INDEPENDENT ADJUSTCORR=YES COVB=ROBUST  /MISSING CLASSMISSING=EXCLUDE  /PRINT CPS DESCRIPTIVES MODELINFO FIT SUMMARY SOLUTION. </pre> |             |
| Resources | Processor Time                                                                                                                                                                                                                                                                                                                                                                                                                                                                                                                                                                                                                                                                                                                                       | 00:00:00.06 |
|           | Elapsed Time                                                                                                                                                                                                                                                                                                                                                                                                                                                                                                                                                                                                                                                                                                                                         | 00:00:00.06 |

### Model Information

|                                      |             |
|--------------------------------------|-------------|
| Dependent Variable                   | PCI         |
| Probability Distribution             | Gamma       |
| Link Function                        | Log         |
| Subject Effect 1                     | Subject     |
| Working Correlation Matrix Structure | Independent |

### Case Processing Summary

|          | N  | Percent |
|----------|----|---------|
| Included | 48 | 98.0%   |
| Excluded | 1  | 2.0%    |
| Total    | 49 | 100.0%  |

### Correlated Data Summary

|                                    |                |         |    |
|------------------------------------|----------------|---------|----|
| Number of Levels                   | Subject Effect | Subject | 13 |
| Number of Subjects                 |                |         | 13 |
| Number of Measurements per Subject | Minimum        |         | 2  |
|                                    | Maximum        |         | 4  |
| Correlation Matrix Dimension       |                |         | 4  |

### Categorical Variable Information

|        |         |           | N  | Percent |
|--------|---------|-----------|----|---------|
| Factor | Terrain | Regular   | 26 | 54.2%   |
|        |         | Irregular | 22 | 45.8%   |
|        |         | Total     | 48 | 100.0%  |
|        | Running | Free      | 24 | 50.0%   |
|        |         | Nordic    | 24 | 50.0%   |
|        |         | Total     | 48 | 100.0%  |

### Continuous Variable Information

|                    |     | N  | Minimum | Maximum | Mean   | Std. Deviation |
|--------------------|-----|----|---------|---------|--------|----------------|
| Dependent Variable | PCI | 48 | 2.30    | 7.56    | 4.3371 | 1.40525        |

### Goodness of Fit<sup>a</sup>

|                                                                                   | Value  |
|-----------------------------------------------------------------------------------|--------|
| Quasi Likelihood under Independence Model Criterion (QIC) <sup>b</sup>            | 12.426 |
| Corrected Quasi Likelihood under Independence Model Criterion (QICC) <sup>b</sup> | 12.221 |

Dependent Variable: PCI  
 Model: (Intercept), Terrain, Running,  
 Terrain \* Running<sup>a</sup>

- a. Information criteria are in smaller-is-better form.
- b. Computed using the full log quasi-likelihood function.

### Tests of Model Effects

| Source            | Wald Chi-Square | Type III |      |
|-------------------|-----------------|----------|------|
|                   |                 | df       | Sig. |
| (Intercept)       | 568.285         | 1        | .000 |
| Terrain           | 3.298           | 1        | .069 |
| Running           | 2.779           | 1        | .095 |
| Terrain * Running | 1.805           | 1        | .179 |

Dependent Variable: PCI  
 Model: (Intercept), Terrain, Running, Terrain \* Running

### Parameter Estimates

| Parameter                          | B              | Std. Error | 95% Wald Confidence Interval |       | Hypothesis Test |
|------------------------------------|----------------|------------|------------------------------|-------|-----------------|
|                                    |                |            | Lower                        | Upper | Wald Chi-Square |
| (Intercept)                        | 1.490          | .1075      | 1.279                        | 1.701 | 192.266         |
| [Terrain=1.00]                     | .073           | .0844      | -.093                        | .238  | .740            |
| [Terrain=2.00]                     | 0 <sup>a</sup> | .          | .                            | .     | .               |
| [Running=1.00]                     | -.203          | .1232      | -.445                        | .038  | 2.724           |
| [Running=2.00]                     | 0 <sup>a</sup> | .          | .                            | .     | .               |
| [Terrain=1.00] *<br>[Running=1.00] | .128           | .0950      | -.059                        | .314  | 1.805           |
| [Terrain=1.00] *<br>[Running=2.00] | 0 <sup>a</sup> | .          | .                            | .     | .               |
| [Terrain=2.00] *<br>[Running=1.00] | 0 <sup>a</sup> | .          | .                            | .     | .               |
| [Terrain=2.00] *<br>[Running=2.00] | 0 <sup>a</sup> | .          | .                            | .     | .               |
| (Scale)                            | .097           |            |                              |       |                 |

### Parameter Estimates

| Parameter                          | Hypothesis Test |      |
|------------------------------------|-----------------|------|
|                                    | df              | Sig. |
| (Intercept)                        | 1               | .000 |
| [Terrain=1.00]                     | 1               | .390 |
| [Terrain=2.00]                     | .               | .    |
| [Running=1.00]                     | 1               | .099 |
| [Running=2.00]                     | .               | .    |
| [Terrain=1.00] *<br>[Running=1.00] | 1               | .179 |
| [Terrain=1.00] *<br>[Running=2.00] | .               | .    |
| [Terrain=2.00] *<br>[Running=1.00] | .               | .    |
| [Terrain=2.00] *<br>[Running=2.00] | .               | .    |
| (Scale)                            |                 |      |

Dependent Variable: PCI

Model: (Intercept), Terrain, Running, Terrain \* Running

a. Set to zero because this parameter is redundant.

### Estimated Marginal Means 1: Terrain



### Estimates

| Terrain   | Mean   | Std. Error | 95% Wald Confidence Interval |        |
|-----------|--------|------------|------------------------------|--------|
|           |        |            | Lower                        | Upper  |
| Regular   | 4.5944 | .35625     | 3.9466                       | 5.3485 |
| Irregular | 4.0084 | .26217     | 3.5261                       | 4.5566 |

### Pairwise Comparisons

| (I) Terrain | (J) Terrain | Mean Difference (I-J) | Std. Error | df | Bonferroni Sig. | 95% Wald Confidence ... |
|-------------|-------------|-----------------------|------------|----|-----------------|-------------------------|
|             |             |                       |            |    |                 | Lower                   |
| Regular     | Irregular   | .5860                 | .33186     | 1  | .077            | -.0644                  |
| Irregular   | Regular     | -.5860                | .33186     | 1  | .077            | -1.2365                 |

### Pairwise Comparisons

| (I) Terrain | (J) Terrain | 95% Wald Confidence ... |
|-------------|-------------|-------------------------|
|             |             | Upper                   |
| Regular     | Irregular   | 1.2365                  |
| Irregular   | Regular     | .0644                   |

Pairwise comparisons of estimated marginal means based on the original scale of dependent variable PCI

### Overall Test Results

| Wald Chi-Square | df | Sig. |
|-----------------|----|------|
| 3.119           | 1  | .077 |

The Wald chi-square tests the effect of Terrain. This test is based on the linearly independent pairwise comparisons among the estimated marginal means.

## Estimated Marginal Means 2: Running

### Estimates

| Running | Mean   | Std. Error | 95% Wald Confidence Interval |        |
|---------|--------|------------|------------------------------|--------|
|         |        |            | Lower                        | Upper  |
| Free    | 4.0023 | .21534     | 3.6017                       | 4.4474 |
| Nordic  | 4.6014 | .41342     | 3.8584                       | 5.4874 |

### Pairwise Comparisons

| (I) Running | (J) Running | Mean Difference (I-J) | Std. Error | df | Bonferroni Sig. | 95% Wald Confidence ...<br>Lower |
|-------------|-------------|-----------------------|------------|----|-----------------|----------------------------------|
| Free        | Nordic      | -.5991                | .37979     | 1  | .115            | -1.3435                          |
| Nordic      | Free        | .5991                 | .37979     | 1  | .115            | -.1453                           |

### Pairwise Comparisons

| (I) Running | (J) Running | 95% Wald Confidence ...<br>Upper |
|-------------|-------------|----------------------------------|
| Free        | Nordic      | .1453                            |
| Nordic      | Free        | 1.3435                           |

Pairwise comparisons of estimated marginal means based on the original scale of dependent variable PCI

### Overall Test Results

| Wald Chi-Square | df | Sig. |
|-----------------|----|------|
| 2.488           | 1  | .115 |

The Wald chi-square tests the effect of Running. This test is based on the linearly independent pairwise comparisons among the estimated marginal means.

### Estimated Marginal Means 3: Terrain\* Running

#### Estimates

| Terrain   | Running | Mean   | Std. Error | 95% Wald Confidence Interval |        |
|-----------|---------|--------|------------|------------------------------|--------|
|           |         |        |            | Lower                        | Upper  |
| Regular   | Free    | 4.4238 | .32907     | 3.8237                       | 5.1182 |
|           | Nordic  | 4.7715 | .43108     | 3.9972                       | 5.6959 |
| Irregular | Free    | 3.6209 | .24546     | 3.1704                       | 4.1354 |
|           | Nordic  | 4.4373 | .47683     | 3.5946                       | 5.4775 |

### Pairwise Comparisons

| (I) Running*Terrain           | (J) Running*Terrain           | Mean Difference (I-J) | Std. Error | df |
|-------------------------------|-------------------------------|-----------------------|------------|----|
| [Running=1.00]*[Terrain=1.00] | [Running=1.00]*[Terrain=2.00] | .8029                 | .38117     | 1  |
|                               | [Running=2.00]*[Terrain=1.00] | -.3477                | .27487     | 1  |
|                               | [Running=2.00]*[Terrain=2.00] | -.0134                | .50630     | 1  |
| [Running=1.00]*[Terrain=2.00] | [Running=1.00]*[Terrain=1.00] | -.8029                | .38117     | 1  |
|                               | [Running=2.00]*[Terrain=1.00] | -1.1506               | .48723     | 1  |
|                               | [Running=2.00]*[Terrain=2.00] | -.8164                | .52159     | 1  |
| [Running=2.00]*[Terrain=1.00] | [Running=1.00]*[Terrain=1.00] | .3477                 | .27487     | 1  |
|                               | [Running=1.00]*[Terrain=2.00] | 1.1506                | .48723     | 1  |
|                               | [Running=2.00]*[Terrain=2.00] | .3343                 | .38320     | 1  |
| [Running=2.00]*[Terrain=2.00] | [Running=1.00]*[Terrain=1.00] | .0134                 | .50630     | 1  |
|                               | [Running=1.00]*[Terrain=2.00] | .8164                 | .52159     | 1  |
|                               | [Running=2.00]*[Terrain=1.00] | -.3343                | .38320     | 1  |

### Pairwise Comparisons

| (I) Running*Terrain           | (J) Running*Terrain           | Bonferroni Sig. | 95% Wald Confidence ...<br>Lower |
|-------------------------------|-------------------------------|-----------------|----------------------------------|
| [Running=1.00]*[Terrain=1.00] | [Running=1.00]*[Terrain=2.00] | .211            | -.2027                           |
|                               | [Running=2.00]*[Terrain=1.00] | 1.000           | -1.0729                          |
|                               | [Running=2.00]*[Terrain=2.00] | 1.000           | -1.3492                          |
| [Running=1.00]*[Terrain=2.00] | [Running=1.00]*[Terrain=1.00] | .211            | -1.8086                          |
|                               | [Running=2.00]*[Terrain=1.00] | .109            | -2.4361                          |
|                               | [Running=2.00]*[Terrain=2.00] | .705            | -2.1925                          |
| [Running=2.00]*[Terrain=1.00] | [Running=1.00]*[Terrain=1.00] | 1.000           | -.3775                           |
|                               | [Running=1.00]*[Terrain=2.00] | .109            | -.1348                           |
|                               | [Running=2.00]*[Terrain=2.00] | 1.000           | -.6767                           |
| [Running=2.00]*[Terrain=2.00] | [Running=1.00]*[Terrain=1.00] | 1.000           | -1.3223                          |
|                               | [Running=1.00]*[Terrain=2.00] | .705            | -.5597                           |
|                               | [Running=2.00]*[Terrain=1.00] | 1.000           | -1.3452                          |

### Pairwise Comparisons

| (I) Running*Terrain           | (J) Running*Terrain           | 95% Wald Confidence ...<br>Upper |
|-------------------------------|-------------------------------|----------------------------------|
| [Running=1.00]*[Terrain=1.00] | [Running=1.00]*[Terrain=2.00] | 1.8086                           |
|                               | [Running=2.00]*[Terrain=1.00] | .3775                            |
|                               | [Running=2.00]*[Terrain=2.00] | 1.3223                           |
| [Running=1.00]*[Terrain=2.00] | [Running=1.00]*[Terrain=1.00] | .2027                            |
|                               | [Running=2.00]*[Terrain=1.00] | .1348                            |
|                               | [Running=2.00]*[Terrain=2.00] | .5597                            |
| [Running=2.00]*[Terrain=1.00] | [Running=1.00]*[Terrain=1.00] | 1.0729                           |
|                               | [Running=1.00]*[Terrain=2.00] | 2.4361                           |
|                               | [Running=2.00]*[Terrain=2.00] | 1.3452                           |
| [Running=2.00]*[Terrain=2.00] | [Running=1.00]*[Terrain=1.00] | 1.3492                           |
|                               | [Running=1.00]*[Terrain=2.00] | 2.1925                           |
|                               | [Running=2.00]*[Terrain=1.00] | .6767                            |

Pairwise comparisons of estimated marginal means based on the original scale of dependent variable PCI

### Overall Test Results

| Wald Chi-Square | df | Sig. |
|-----------------|----|------|
| 5.654           | 3  | .130 |

The Wald chi-square tests the effect of Running\*Terrain. This test is based on the linearly independent pairwise comparisons among the estimated marginal means.

```
GENLIN Accuracy BY Terrain Running (ORDER=ASCENDING)
  /MODEL Terrain Running Terrain*Running INTERCEPT=YES
DISTRIBUTION=GAMMA LINK=LOG
```

```

/CRITERIA SCALE=MLE PCONVERGE=1E-006(ABSOLUTE) SINGULAR=1E-012 ANALYSISTY
PE=3(WALD) CILEVEL=95
LIKELIHOOD=FULL
/EMMEANS TABLES=Terrain SCALE=ORIGINAL COMPARE=Terrain CONTRAST=PAIRWISE
PADJUST=BONFERRONI
/EMMEANS TABLES=Running SCALE=ORIGINAL COMPARE=Running CONTRAST=PAIRWISE
PADJUST=BONFERRONI
/EMMEANS TABLES=Terrain*Running SCALE=ORIGINAL COMPARE=Running*Terrain CO
NTRAST=PAIRWISE
PADJUST=BONFERRONI
/REPEATED SUBJECT=Subject SORT=YES CORRTYPE=INDEPENDENT ADJUSTCORR=YES CO
VB=ROBUST
/MISSING CLASSMISSING=EXCLUDE
/PRINT CPS DESCRIPTIVES MODELINFO FIT SUMMARY SOLUTION.

```

## Generalized Linear Models

### Notes

|                        |                                |                                                                                                                                        |
|------------------------|--------------------------------|----------------------------------------------------------------------------------------------------------------------------------------|
| Output Created         |                                | 30-OCT-2023 12:30:16                                                                                                                   |
| Comments               |                                |                                                                                                                                        |
| Input                  | Data                           | C:<br>\Users\andre\Documents\<br>Andre\Pesquisa\Artigos<br>para Publicar\Nordic<br>Running\Data\Statistics\S<br>PSS\Spatiotemporal.sav |
|                        | Active Dataset                 | DataSet1                                                                                                                               |
|                        | Filter                         | <none>                                                                                                                                 |
|                        | Weight                         | <none>                                                                                                                                 |
|                        | Split File                     | <none>                                                                                                                                 |
|                        | N of Rows in Working Data File | 49                                                                                                                                     |
| Missing Value Handling | Definition of Missing          | User-defined missing values for factor, subject and within-subject variables are treated as missing.                                   |
|                        | Cases Used                     | Statistics are based on cases with valid data for all variables in the model.                                                          |
| Weight Handling        |                                | not applicable                                                                                                                         |

## Notes

|           |                                                                                                                                                                                                                                                                                                                                                                                                                                                                                                                                                                                                                                                                                                                                                           |             |
|-----------|-----------------------------------------------------------------------------------------------------------------------------------------------------------------------------------------------------------------------------------------------------------------------------------------------------------------------------------------------------------------------------------------------------------------------------------------------------------------------------------------------------------------------------------------------------------------------------------------------------------------------------------------------------------------------------------------------------------------------------------------------------------|-------------|
| Syntax    | <pre> GENLIN Accuracy BY Terrain Running (ORDER=ASCENDING)  /MODEL Terrain Running Terrain*Running INTERCEPT=YES DISTRIBUTION=GAMMA LINK=LOG  /CRITERIA SCALE=MLE PCONVERGE=1E-006 (ABSOLUTE) SINGULAR=1E-012 ANALYSISTYPE=3 (WALD) CILEVEL=95 LIKELIHOOD=FULL  /EMMEANS TABLES=Terrain SCALE=ORIGINAL COMPARE=Terrain CONTRAST=PAIRWISE PADJUST=BONFERRONI  /EMMEANS TABLES=Running SCALE=ORIGINAL COMPARE=Running CONTRAST=PAIRWISE PADJUST=BONFERRONI  /EMMEANS TABLES=Terrain*Running SCALE=ORIGINAL COMPARE=Running*Terrain CONTRAST=PAIRWISE  PADJUST=BONFERRONI  /REPEATED SUBJECT=Subject SORT=YES CORRTYPE=INDEPENDENT ADJUSTCORR=YES COVB=ROBUST  /MISSING CLASSMISSING=EXCLUDE  /PRINT CPS DESCRIPTIVES MODELINFO FIT SUMMARY SOLUTION. </pre> |             |
| Resources | Processor Time                                                                                                                                                                                                                                                                                                                                                                                                                                                                                                                                                                                                                                                                                                                                            | 00:00:00.06 |
|           | Elapsed Time                                                                                                                                                                                                                                                                                                                                                                                                                                                                                                                                                                                                                                                                                                                                              | 00:00:00.08 |

### Model Information

|                                      |             |
|--------------------------------------|-------------|
| Dependent Variable                   | Accuracy    |
| Probability Distribution             | Gamma       |
| Link Function                        | Log         |
| Subject Effect 1                     | Subject     |
| Working Correlation Matrix Structure | Independent |

### Case Processing Summary

|          | N  | Percent |
|----------|----|---------|
| Included | 48 | 98.0%   |
| Excluded | 1  | 2.0%    |
| Total    | 49 | 100.0%  |

### Correlated Data Summary

|                                    |                |         |    |
|------------------------------------|----------------|---------|----|
| Number of Levels                   | Subject Effect | Subject | 13 |
| Number of Subjects                 |                |         | 13 |
| Number of Measurements per Subject | Minimum        |         | 2  |
|                                    | Maximum        |         | 4  |
| Correlation Matrix Dimension       |                |         | 4  |

### Categorical Variable Information

|        |         |           | N  | Percent |
|--------|---------|-----------|----|---------|
| Factor | Terrain | Regular   | 26 | 54.2%   |
|        |         | Irregular | 22 | 45.8%   |
|        |         | Total     | 48 | 100.0%  |
|        | Running | Free      | 24 | 50.0%   |
|        |         | Nordic    | 24 | 50.0%   |
|        |         | Total     | 48 | 100.0%  |

### Continuous Variable Information

|                    |          | N  | Minimum | Maximum | Mean   | Std. Deviation |
|--------------------|----------|----|---------|---------|--------|----------------|
| Dependent Variable | Accuracy | 48 | .14     | 3.49    | 1.2292 | .81080         |



### Goodness of Fit<sup>a</sup>

|                                                                                   | Value  |
|-----------------------------------------------------------------------------------|--------|
| Quasi Likelihood under Independence Model Criterion (QIC) <sup>b</sup>            | 29.888 |
| Corrected Quasi Likelihood under Independence Model Criterion (QICC) <sup>b</sup> | 30.388 |

Dependent Variable: Accuracy  
Model: (Intercept), Terrain, Running,  
Terrain \* Running<sup>a</sup>

- a. Information criteria are in smaller-is-better form.
- b. Computed using the full log quasi-likelihood function.

### Tests of Model Effects

| Source            | Wald Chi-Square | Type III |      |
|-------------------|-----------------|----------|------|
|                   |                 | df       | Sig. |
| (Intercept)       | 2.186           | 1        | .139 |
| Terrain           | 2.813           | 1        | .093 |
| Running           | 1.087           | 1        | .297 |
| Terrain * Running | .730            | 1        | .393 |

Dependent Variable: Accuracy  
Model: (Intercept), Terrain, Running, Terrain \* Running

### Parameter Estimates

| Parameter                          | B              | Std. Error | 95% Wald Confidence Interval |       | Hypothesis Test |
|------------------------------------|----------------|------------|------------------------------|-------|-----------------|
|                                    |                |            | Lower                        | Upper | Wald Chi-Square |
| (Intercept)                        | .157           | .2059      | -.246                        | .560  | .582            |
| [Terrain=1.00]                     | .219           | .2068      | -.186                        | .625  | 1.125           |
| [Terrain=2.00]                     | 0 <sup>a</sup> | .          | .                            | .     | .               |
| [Running=1.00]                     | -.286          | .2760      | -.827                        | .255  | 1.073           |
| [Running=2.00]                     | 0 <sup>a</sup> | .          | .                            | .     | .               |
| [Terrain=1.00] *<br>[Running=1.00] | .208           | .2433      | -.269                        | .685  | .730            |
| [Terrain=1.00] *<br>[Running=2.00] | 0 <sup>a</sup> | .          | .                            | .     | .               |
| [Terrain=2.00] *<br>[Running=1.00] | 0 <sup>a</sup> | .          | .                            | .     | .               |
| [Terrain=2.00] *<br>[Running=2.00] | 0 <sup>a</sup> | .          | .                            | .     | .               |
| (Scale)                            | .439           |            |                              |       |                 |

### Parameter Estimates

| Parameter                          | Hypothesis Test |      |
|------------------------------------|-----------------|------|
|                                    | df              | Sig. |
| (Intercept)                        | 1               | .446 |
| [Terrain=1.00]                     | 1               | .289 |
| [Terrain=2.00]                     | .               | .    |
| [Running=1.00]                     | 1               | .300 |
| [Running=2.00]                     | .               | .    |
| [Terrain=1.00] *<br>[Running=1.00] | 1               | .393 |
| [Terrain=1.00] *<br>[Running=2.00] | .               | .    |
| [Terrain=2.00] *<br>[Running=1.00] | .               | .    |
| [Terrain=2.00] *<br>[Running=2.00] | .               | .    |
| (Scale)                            |                 |      |

Dependent Variable: Accuracy

Model: (Intercept), Terrain, Running, Terrain \* Running

a. Set to zero because this parameter is redundant.

### Estimated Marginal Means 1: Terrain

### Estimates

| Terrain   | Mean   | Std. Error | 95% Wald Confidence Interval |        |
|-----------|--------|------------|------------------------------|--------|
|           |        |            | Lower                        | Upper  |
| Regular   | 1.4012 | .21072     | 1.0435                       | 1.8816 |
| Irregular | 1.0142 | .15780     | .7476                        | 1.3758 |

### Pairwise Comparisons

| (I) Terrain | (J) Terrain | Mean Difference (I-J) | Std. Error | df | Bonferroni Sig. | 95% Wald Confidence ... |
|-------------|-------------|-----------------------|------------|----|-----------------|-------------------------|
|             |             |                       |            |    |                 | Lower                   |
| Regular     | Irregular   | .3871                 | .23570     | 1  | .101            | -.0749                  |
| Irregular   | Regular     | -.3871                | .23570     | 1  | .101            | -.8490                  |

### Pairwise Comparisons

| (I) Terrain | (J) Terrain | 95% Wald Confidence ... |
|-------------|-------------|-------------------------|
|             |             | Upper                   |
| Regular     | Irregular   | .8490                   |
| Irregular   | Regular     | .0749                   |

Pairwise comparisons of estimated marginal means based on the original scale of dependent variable Accuracy

### Overall Test Results

| Wald Chi-Square | df | Sig. |
|-----------------|----|------|
| 2.697           | 1  | .101 |

The Wald chi-square tests the effect of Terrain. This test is based on the linearly independent pairwise comparisons among the estimated marginal means.

## Estimated Marginal Means 2: Running

### Estimates

| Running | Mean   | Std. Error | 95% Wald Confidence Interval |        |
|---------|--------|------------|------------------------------|--------|
|         |        |            | Lower                        | Upper  |
| Free    | 1.0885 | .15079     | .8296                        | 1.4280 |
| Nordic  | 1.3056 | .20345     | .9620                        | 1.7720 |

### Pairwise Comparisons

| (I) Running | (J) Running | Mean Difference (I-J) | Std. Error | df | Bonferroni Sig. | 95% Wald Confidence ...<br>Lower |
|-------------|-------------|-----------------------|------------|----|-----------------|----------------------------------|
| Free        | Nordic      | -.2171                | .21358     | 1  | .309            | -.6357                           |
| Nordic      | Free        | .2171                 | .21358     | 1  | .309            | -.2015                           |

### Pairwise Comparisons

| (I) Running | (J) Running | 95% Wald Confidence ...<br>Upper |
|-------------|-------------|----------------------------------|
| Free        | Nordic      | .2015                            |
| Nordic      | Free        | .6357                            |

Pairwise comparisons of estimated marginal means based on the original scale of dependent variable Accuracy

### Overall Test Results

| Wald Chi-Square | df | Sig. |
|-----------------|----|------|
| 1.034           | 1  | .309 |

The Wald chi-square tests the effect of Running. This test is based on the linearly independent pairwise comparisons among the estimated marginal means.

### Estimated Marginal Means 3: Terrain\* Running

#### Estimates

| Terrain   | Running | Mean   | Std. Error | 95% Wald Confidence Interval |        |
|-----------|---------|--------|------------|------------------------------|--------|
|           |         |        |            | Lower                        | Upper  |
| Regular   | Free    | 1.3477 | .21232     | .9897                        | 1.8352 |
|           | Nordic  | 1.4569 | .24192     | 1.0522                       | 2.0173 |
| Irregular | Free    | .8791  | .18467     | .5824                        | 1.3269 |
|           | Nordic  | 1.1700 | .24085     | .7816                        | 1.7515 |

### Pairwise Comparisons

| (I) Running*Terrain           | (J) Running*Terrain           | Mean Difference (I-J) | Std. Error | df |
|-------------------------------|-------------------------------|-----------------------|------------|----|
| [Running=1.00]*[Terrain=1.00] | [Running=1.00]*[Terrain=2.00] | .4686                 | .26442     | 1  |
|                               | [Running=2.00]*[Terrain=1.00] | -.1092                | .16988     | 1  |
|                               | [Running=2.00]*[Terrain=2.00] | .1777                 | .30436     | 1  |
| [Running=1.00]*[Terrain=2.00] | [Running=1.00]*[Terrain=1.00] | -.4686                | .26442     | 1  |
|                               | [Running=2.00]*[Terrain=1.00] | -.5778                | .31045     | 1  |
|                               | [Running=2.00]*[Terrain=2.00] | -.2909                | .28544     | 1  |
| [Running=2.00]*[Terrain=1.00] | [Running=1.00]*[Terrain=1.00] | .1092                 | .16988     | 1  |
|                               | [Running=1.00]*[Terrain=2.00] | .5778                 | .31045     | 1  |
|                               | [Running=2.00]*[Terrain=2.00] | .2869                 | .26496     | 1  |
| [Running=2.00]*[Terrain=2.00] | [Running=1.00]*[Terrain=1.00] | -.1777                | .30436     | 1  |
|                               | [Running=1.00]*[Terrain=2.00] | .2909                 | .28544     | 1  |
|                               | [Running=2.00]*[Terrain=1.00] | -.2869                | .26496     | 1  |

### Pairwise Comparisons

| (I) Running*Terrain           | (J) Running*Terrain           | Bonferroni Sig. | 95% Wald Confidence ...<br>Lower |
|-------------------------------|-------------------------------|-----------------|----------------------------------|
| [Running=1.00]*[Terrain=1.00] | [Running=1.00]*[Terrain=2.00] | .458            | -.2290                           |
|                               | [Running=2.00]*[Terrain=1.00] | 1.000           | -.5574                           |
|                               | [Running=2.00]*[Terrain=2.00] | 1.000           | -.6253                           |
| [Running=1.00]*[Terrain=2.00] | [Running=1.00]*[Terrain=1.00] | .458            | -1.1662                          |
|                               | [Running=2.00]*[Terrain=1.00] | .376            | -1.3969                          |
|                               | [Running=2.00]*[Terrain=2.00] | 1.000           | -1.0440                          |
| [Running=2.00]*[Terrain=1.00] | [Running=1.00]*[Terrain=1.00] | 1.000           | -.3390                           |
|                               | [Running=1.00]*[Terrain=2.00] | .376            | -.2412                           |
|                               | [Running=2.00]*[Terrain=2.00] | 1.000           | -.4121                           |
| [Running=2.00]*[Terrain=2.00] | [Running=1.00]*[Terrain=1.00] | 1.000           | -.9807                           |
|                               | [Running=1.00]*[Terrain=2.00] | 1.000           | -.4622                           |
|                               | [Running=2.00]*[Terrain=1.00] | 1.000           | -.9859                           |

### Pairwise Comparisons

| (I) Running*Terrain           | (J) Running*Terrain           | 95% Wald Confidence ...<br>Upper |
|-------------------------------|-------------------------------|----------------------------------|
| [Running=1.00]*[Terrain=1.00] | [Running=1.00]*[Terrain=2.00] | 1.1662                           |
|                               | [Running=2.00]*[Terrain=1.00] | .3390                            |
|                               | [Running=2.00]*[Terrain=2.00] | .9807                            |
| [Running=1.00]*[Terrain=2.00] | [Running=1.00]*[Terrain=1.00] | .2290                            |
|                               | [Running=2.00]*[Terrain=1.00] | .2412                            |
|                               | [Running=2.00]*[Terrain=2.00] | .4622                            |
| [Running=2.00]*[Terrain=1.00] | [Running=1.00]*[Terrain=1.00] | .5574                            |
|                               | [Running=1.00]*[Terrain=2.00] | 1.3969                           |
|                               | [Running=2.00]*[Terrain=2.00] | .9859                            |
| [Running=2.00]*[Terrain=2.00] | [Running=1.00]*[Terrain=1.00] | .6253                            |
|                               | [Running=1.00]*[Terrain=2.00] | 1.0440                           |
|                               | [Running=2.00]*[Terrain=1.00] | .4121                            |

Pairwise comparisons of estimated marginal means based on the original scale of dependent variable Accuracy

### Overall Test Results

| Wald Chi-Square | df | Sig. |
|-----------------|----|------|
| 3.619           | 3  | .306 |

The Wald chi-square tests the effect of Running\*Terrain. This test is based on the linearly independent pairwise comparisons among the estimated marginal means.

```
GENLIN Variability BY Terrain Running (ORDER=ASCENDING)
  /MODEL Terrain Running Terrain*Running INTERCEPT=YES
DISTRIBUTION=GAMMA LINK=LOG
```

```

/CRITERIA SCALE=MLE PCONVERGE=1E-006(ABSOLUTE) SINGULAR=1E-012 ANALYSISTY
PE=3(WALD) CILEVEL=95
LIKELIHOOD=FULL
/EMMEANS TABLES=Terrain SCALE=ORIGINAL COMPARE=Terrain CONTRAST=PAIRWISE
PADJUST=BONFERRONI
/EMMEANS TABLES=Running SCALE=ORIGINAL COMPARE=Running CONTRAST=PAIRWISE
PADJUST=BONFERRONI
/EMMEANS TABLES=Terrain*Running SCALE=ORIGINAL COMPARE=Running*Terrain CO
NTRAST=PAIRWISE
PADJUST=BONFERRONI
/REPEATED SUBJECT=Subject SORT=YES CORRTYPE=INDEPENDENT ADJUSTCORR=YES CO
VB=ROBUST
/MISSING CLASSMISSING=EXCLUDE
/PRINT CPS DESCRIPTIVES MODELINFO FIT SUMMARY SOLUTION.

```

## Generalized Linear Models

### Notes

|                        |                                |                                                                                                                                        |
|------------------------|--------------------------------|----------------------------------------------------------------------------------------------------------------------------------------|
| Output Created         |                                | 30-OCT-2023 12:31:37                                                                                                                   |
| Comments               |                                |                                                                                                                                        |
| Input                  | Data                           | C:<br>\Users\andre\Documents\<br>Andre\Pesquisa\Artigos<br>para Publicar\Nordic<br>Running\Data\Statistics\S<br>PSS\Spatiotemporal.sav |
|                        | Active Dataset                 | DataSet1                                                                                                                               |
|                        | Filter                         | <none>                                                                                                                                 |
|                        | Weight                         | <none>                                                                                                                                 |
|                        | Split File                     | <none>                                                                                                                                 |
|                        | N of Rows in Working Data File | 49                                                                                                                                     |
| Missing Value Handling | Definition of Missing          | User-defined missing values for factor, subject and within-subject variables are treated as missing.                                   |
|                        | Cases Used                     | Statistics are based on cases with valid data for all variables in the model.                                                          |
| Weight Handling        |                                | not applicable                                                                                                                         |



## Notes

|           |                                                                                                                                                                                                                                                                                                                                                                                                                                                                                                                                                                                                                                                                                                                                                                 |             |
|-----------|-----------------------------------------------------------------------------------------------------------------------------------------------------------------------------------------------------------------------------------------------------------------------------------------------------------------------------------------------------------------------------------------------------------------------------------------------------------------------------------------------------------------------------------------------------------------------------------------------------------------------------------------------------------------------------------------------------------------------------------------------------------------|-------------|
| Syntax    | <pre> GENLIN Variability BY Terrain Running (ORDER=ASCENDING)  /MODEL Terrain Running Terrain*Running INTERCEPT=YES DISTRIBUTION=GAMMA LINK=LOG  /CRITERIA SCALE=MLE PCONVERGE=1E-006 (ABSOLUTE) SINGULAR=1E-012 ANALYSISTYPE=3 (WALD) CILEVEL=95 LIKELIHOOD=FULL  /EMMEANS TABLES=Terrain SCALE=ORIGINAL COMPARE=Terrain CONTRAST=PAIRWISE PADJUST=BONFERRONI  /EMMEANS TABLES=Running SCALE=ORIGINAL COMPARE=Running CONTRAST=PAIRWISE PADJUST=BONFERRONI  /EMMEANS TABLES=Terrain*Running SCALE=ORIGINAL COMPARE=Running*Terr ain CONTRAST=PAIRWISE  PADJUST=BONFERRONI  /REPEATED SUBJECT=Subject SORT=YES CORRTYPE=INDEPEND ENT ADJUSTCORR=YES COVB=ROBUST  /MISSING CLASSMISSING=EXCLU DE  /PRINT CPS DESCRIPTIVES MODELINFO FIT SUMMARY SOLUTION. </pre> |             |
| Resources | Processor Time                                                                                                                                                                                                                                                                                                                                                                                                                                                                                                                                                                                                                                                                                                                                                  | 00:00:00.06 |
|           | Elapsed Time                                                                                                                                                                                                                                                                                                                                                                                                                                                                                                                                                                                                                                                                                                                                                    | 00:00:00.07 |

### Model Information

|                                      |             |
|--------------------------------------|-------------|
| Dependent Variable                   | Variability |
| Probability Distribution             | Gamma       |
| Link Function                        | Log         |
| Subject Effect 1                     | Subject     |
| Working Correlation Matrix Structure | Independent |

### Case Processing Summary

|          | N  | Percent |
|----------|----|---------|
| Included | 48 | 98.0%   |
| Excluded | 1  | 2.0%    |
| Total    | 49 | 100.0%  |

### Correlated Data Summary

|                                    |                |         |    |
|------------------------------------|----------------|---------|----|
| Number of Levels                   | Subject Effect | Subject | 13 |
| Number of Subjects                 |                |         | 13 |
| Number of Measurements per Subject | Minimum        |         | 2  |
|                                    | Maximum        |         | 4  |
| Correlation Matrix Dimension       |                |         | 4  |

### Categorical Variable Information

|        |         |           | N  | Percent |
|--------|---------|-----------|----|---------|
| Factor | Terrain | Regular   | 26 | 54.2%   |
|        |         | Irregular | 22 | 45.8%   |
|        |         | Total     | 48 | 100.0%  |
|        | Running | Free      | 24 | 50.0%   |
|        |         | Nordic    | 24 | 50.0%   |
|        |         | Total     | 48 | 100.0%  |

### Continuous Variable Information

|                    |             | N  | Minimum | Maximum | Mean   | Std. Deviation |
|--------------------|-------------|----|---------|---------|--------|----------------|
| Dependent Variable | Variability | 48 | 1.93    | 6.04    | 3.1083 | .88261         |

### Goodness of Fit<sup>a</sup>

|                                                                                   | Value  |
|-----------------------------------------------------------------------------------|--------|
| Quasi Likelihood under Independence Model Criterion (QIC) <sup>b</sup>            | 11.951 |
| Corrected Quasi Likelihood under Independence Model Criterion (QICC) <sup>b</sup> | 10.960 |

Dependent Variable: Variability  
Model: (Intercept), Terrain, Running,  
Terrain \* Running<sup>a</sup>

- Information criteria are in smaller-is-better form.
- Computed using the full log quasi-likelihood function.

### Tests of Model Effects

| Source            | Wald Chi-Square | Type III |      |
|-------------------|-----------------|----------|------|
|                   |                 | df       | Sig. |
| (Intercept)       | 461.127         | 1        | .000 |
| Terrain           | .911            | 1        | .340 |
| Running           | 2.603           | 1        | .107 |
| Terrain * Running | 1.927           | 1        | .165 |

Dependent Variable: Variability  
Model: (Intercept), Terrain, Running, Terrain \* Running

### Parameter Estimates

| Parameter                          | B              | Std. Error | 95% Wald Confidence Interval |       | Hypothesis Test |
|------------------------------------|----------------|------------|------------------------------|-------|-----------------|
|                                    |                |            | Lower                        | Upper | Wald Chi-Square |
| (Intercept)                        | 1.185          | .0977      | .993                         | 1.376 | 146.990         |
| [Terrain=1.00]                     | .013           | .0746      | -.133                        | .159  | .031            |
| [Terrain=2.00]                     | 0 <sup>a</sup> | .          | .                            | .     | .               |
| [Running=1.00]                     | -.175          | .0857      | -.343                        | -.007 | 4.182           |
| [Running=2.00]                     | 0 <sup>a</sup> | .          | .                            | .     | .               |
| [Terrain=1.00] *<br>[Running=1.00] | .102           | .0731      | -.042                        | .245  | 1.927           |
| [Terrain=1.00] *<br>[Running=2.00] | 0 <sup>a</sup> | .          | .                            | .     | .               |
| [Terrain=2.00] *<br>[Running=1.00] | 0 <sup>a</sup> | .          | .                            | .     | .               |
| [Terrain=2.00] *<br>[Running=2.00] | 0 <sup>a</sup> | .          | .                            | .     | .               |
| (Scale)                            | .076           |            |                              |       |                 |

### Parameter Estimates

| Parameter                          | Hypothesis Test |      |
|------------------------------------|-----------------|------|
|                                    | df              | Sig. |
| (Intercept)                        | 1               | .000 |
| [Terrain=1.00]                     | 1               | .860 |
| [Terrain=2.00]                     | .               | .    |
| [Running=1.00]                     | 1               | .041 |
| [Running=2.00]                     | .               | .    |
| [Terrain=1.00] *<br>[Running=1.00] | 1               | .165 |
| [Terrain=1.00] *<br>[Running=2.00] | .               | .    |
| [Terrain=2.00] *<br>[Running=1.00] | .               | .    |
| [Terrain=2.00] *<br>[Running=2.00] | .               | .    |
| (Scale)                            |                 |      |

Dependent Variable: Variability

Model: (Intercept), Terrain, Running, Terrain \* Running

a. Set to zero because this parameter is redundant.

### Estimated Marginal Means 1: Terrain

### Estimates

| Terrain   | Mean   | Std. Error | 95% Wald Confidence Interval |        |
|-----------|--------|------------|------------------------------|--------|
|           |        |            | Lower                        | Upper  |
| Regular   | 3.1924 | .20286     | 2.8186                       | 3.6159 |
| Irregular | 2.9949 | .18291     | 2.6570                       | 3.3757 |

### Pairwise Comparisons

| (I) Terrain | (J) Terrain | Mean Difference (I-J) | Std. Error | df | Bonferroni Sig. | 95% Wald Confidence ... |
|-------------|-------------|-----------------------|------------|----|-----------------|-------------------------|
|             |             |                       |            |    |                 | Lower                   |
| Regular     | Irregular   | .1976                 | .20783     | 1  | .342            | -.2098                  |
| Irregular   | Regular     | -.1976                | .20783     | 1  | .342            | -.6049                  |

### Pairwise Comparisons

| (I) Terrain | (J) Terrain | 95% Wald Confidence ... |
|-------------|-------------|-------------------------|
|             |             | Upper                   |
| Regular     | Irregular   | .6049                   |
| Irregular   | Regular     | .2098                   |

Pairwise comparisons of estimated marginal means based on the original scale of dependent variable Variability

### Overall Test Results

| Wald Chi-Square | df | Sig. |
|-----------------|----|------|
| .904            | 1  | .342 |

The Wald chi-square tests the effect of Terrain. This test is based on the linearly independent pairwise comparisons among the estimated marginal means.

## Estimated Marginal Means 2: Running

### Estimates

| Running | Mean   | Std. Error | 95% Wald Confidence Interval |        |
|---------|--------|------------|------------------------------|--------|
|         |        |            | Lower                        | Upper  |
| Free    | 2.9055 | .11431     | 2.6899                       | 3.1384 |
| Nordic  | 3.2906 | .27442     | 2.7944                       | 3.8749 |

### Pairwise Comparisons

| (I) Running | (J) Running | Mean Difference (I-J) | Std. Error | df | Bonferroni Sig. | 95% Wald Confidence ...<br>Lower |
|-------------|-------------|-----------------------|------------|----|-----------------|----------------------------------|
| Free        | Nordic      | -.3851                | .25294     | 1  | .128            | -.8809                           |
| Nordic      | Free        | .3851                 | .25294     | 1  | .128            | -.1106                           |

### Pairwise Comparisons

| (I) Running | (J) Running | 95% Wald Confidence ...<br>Upper |
|-------------|-------------|----------------------------------|
| Free        | Nordic      | .1106                            |
| Nordic      | Free        | .8809                            |

Pairwise comparisons of estimated marginal means based on the original scale of dependent variable Variability

### Overall Test Results

| Wald Chi-Square | df | Sig. |
|-----------------|----|------|
| 2.318           | 1  | .128 |

The Wald chi-square tests the effect of Running. This test is based on the linearly independent pairwise comparisons among the estimated marginal means.

## Estimated Marginal Means 3: Terrain\* Running

### Estimates

| Terrain   | Running | Mean   | Std. Error | 95% Wald Confidence Interval |        |
|-----------|---------|--------|------------|------------------------------|--------|
|           |         |        |            | Lower                        | Upper  |
| Regular   | Free    | 3.0769 | .20744     | 2.6961                       | 3.5116 |
|           | Nordic  | 3.3123 | .28002     | 2.8065                       | 3.9092 |
| Irregular | Free    | 2.7436 | .10928     | 2.5376                       | 2.9664 |
|           | Nordic  | 3.2691 | .31939     | 2.6994                       | 3.9590 |

### Pairwise Comparisons

| (I) Running*Terrain           | (J) Running*Terrain           | Mean Difference (I-J) | Std. Error | df |
|-------------------------------|-------------------------------|-----------------------|------------|----|
| [Running=1.00]*[Terrain=1.00] | [Running=1.00]*[Terrain=2.00] | .3333                 | .23339     | 1  |
|                               | [Running=2.00]*[Terrain=1.00] | -.2354                | .27569     | 1  |
|                               | [Running=2.00]*[Terrain=2.00] | -.1922                | .38475     | 1  |
| [Running=1.00]*[Terrain=2.00] | [Running=1.00]*[Terrain=1.00] | -.3333                | .23339     | 1  |
|                               | [Running=2.00]*[Terrain=1.00] | -.5687                | .26431     | 1  |
|                               | [Running=2.00]*[Terrain=2.00] | -.5255                | .28278     | 1  |
| [Running=2.00]*[Terrain=1.00] | [Running=1.00]*[Terrain=1.00] | .2354                 | .27569     | 1  |
|                               | [Running=1.00]*[Terrain=2.00] | .5687                 | .26431     | 1  |
|                               | [Running=2.00]*[Terrain=2.00] | .0432                 | .24486     | 1  |
| [Running=2.00]*[Terrain=2.00] | [Running=1.00]*[Terrain=1.00] | .1922                 | .38475     | 1  |
|                               | [Running=1.00]*[Terrain=2.00] | .5255                 | .28278     | 1  |
|                               | [Running=2.00]*[Terrain=1.00] | -.0432                | .24486     | 1  |

### Pairwise Comparisons

| (I) Running*Terrain           | (J) Running*Terrain           | Bonferroni Sig. | 95% Wald Confidence ...<br>Lower |
|-------------------------------|-------------------------------|-----------------|----------------------------------|
| [Running=1.00]*[Terrain=1.00] | [Running=1.00]*[Terrain=2.00] | .920            | -.2824                           |
|                               | [Running=2.00]*[Terrain=1.00] | 1.000           | -.9627                           |
|                               | [Running=2.00]*[Terrain=2.00] | 1.000           | -1.2072                          |
| [Running=1.00]*[Terrain=2.00] | [Running=1.00]*[Terrain=1.00] | .920            | -.9490                           |
|                               | [Running=2.00]*[Terrain=1.00] | .189            | -1.2660                          |
|                               | [Running=2.00]*[Terrain=2.00] | .379            | -1.2715                          |
| [Running=2.00]*[Terrain=1.00] | [Running=1.00]*[Terrain=1.00] | 1.000           | -.4920                           |
|                               | [Running=1.00]*[Terrain=2.00] | .189            | -.1286                           |
|                               | [Running=2.00]*[Terrain=2.00] | 1.000           | -.6028                           |
| [Running=2.00]*[Terrain=2.00] | [Running=1.00]*[Terrain=1.00] | 1.000           | -.8229                           |
|                               | [Running=1.00]*[Terrain=2.00] | .379            | -.2206                           |
|                               | [Running=2.00]*[Terrain=1.00] | 1.000           | -.6892                           |



### Pairwise Comparisons

| (I) Running*Terrain           | (J) Running*Terrain           | 95% Wald Confidence ...<br>Upper |
|-------------------------------|-------------------------------|----------------------------------|
| [Running=1.00]*[Terrain=1.00] | [Running=1.00]*[Terrain=2.00] | .9490                            |
|                               | [Running=2.00]*[Terrain=1.00] | .4920                            |
|                               | [Running=2.00]*[Terrain=2.00] | .8229                            |
| [Running=1.00]*[Terrain=2.00] | [Running=1.00]*[Terrain=1.00] | .2824                            |
|                               | [Running=2.00]*[Terrain=1.00] | .1286                            |
|                               | [Running=2.00]*[Terrain=2.00] | .2206                            |
| [Running=2.00]*[Terrain=1.00] | [Running=1.00]*[Terrain=1.00] | .9627                            |
|                               | [Running=1.00]*[Terrain=2.00] | 1.2660                           |
|                               | [Running=2.00]*[Terrain=2.00] | .6892                            |
| [Running=2.00]*[Terrain=2.00] | [Running=1.00]*[Terrain=1.00] | 1.2072                           |
|                               | [Running=1.00]*[Terrain=2.00] | 1.2715                           |
|                               | [Running=2.00]*[Terrain=1.00] | .6028                            |

Pairwise comparisons of estimated marginal means based on the original scale of dependent variable Variability

### Overall Test Results

| Wald Chi-Square | df | Sig. |
|-----------------|----|------|
| 6.301           | 3  | .098 |

The Wald chi-square tests the effect of Running\*Terrain. This test is based on the linearly independent pairwise comparisons among the estimated marginal means.

## PERCEPTUAL RESPONSE VARIABLES

```

GENLIN Borg010 BY Terrain Running (ORDER=ASCENDING)
  /MODEL Terrain Running Terrain*Running INTERCEPT=YES
DISTRIBUTION=GAMMA LINK=LOG
  /CRITERIA SCALE=MLE PCONVERGE=1E-006(ABSOLUTE) SINGULAR=1E-012 ANALYSISTY
PE=3(WALD) CILEVEL=95
  LIKELIHOOD=FULL
  /EMMEANS TABLES=Terrain SCALE=ORIGINAL COMPARE=Terrain CONTRAST=PAIRWISE
PADJUST=BONFERRONI
  /EMMEANS TABLES=Running SCALE=ORIGINAL COMPARE=Running CONTRAST=PAIRWISE
PADJUST=BONFERRONI
  /EMMEANS TABLES=Terrain*Running SCALE=ORIGINAL COMPARE=Running*Terrain CO
NTRAST=PAIRWISE
  PADJUST=BONFERRONI
  /REPEATED SUBJECT=Subject SORT=YES CORRTYPE=INDEPENDENT ADJUSTCORR=YES CO
VB=ROBUST
  /MISSING CLASSMISSING=EXCLUDE

```

## Generalized Linear Models

### Notes

|                        |                                |                                                                                                                                |
|------------------------|--------------------------------|--------------------------------------------------------------------------------------------------------------------------------|
| Output Created         |                                | 30-OCT-2023 12:34:48                                                                                                           |
| Comments               |                                |                                                                                                                                |
| Input                  | Data                           | C:<br>\Users\andre\Documents\<br>Andre\Pesquisa\Artigos<br>para Publicar\Nordic<br>Running\Data\Statistics\S<br>PSS\Scales.sav |
|                        | Active Dataset                 | DataSet5                                                                                                                       |
|                        | Filter                         | <none>                                                                                                                         |
|                        | Weight                         | <none>                                                                                                                         |
|                        | Split File                     | <none>                                                                                                                         |
|                        | N of Rows in Working Data File | 101                                                                                                                            |
| Missing Value Handling | Definition of Missing          | User-defined missing values for factor, subject and within-subject variables are treated as missing.                           |
|                        | Cases Used                     | Statistics are based on cases with valid data for all variables in the model.                                                  |
| Weight Handling        |                                | not applicable                                                                                                                 |

## Notes

|           |                                                                                                                                                                                                                                                                                                                                                                                                                                                                                                                                                                                                                                                                                                                                                          |             |
|-----------|----------------------------------------------------------------------------------------------------------------------------------------------------------------------------------------------------------------------------------------------------------------------------------------------------------------------------------------------------------------------------------------------------------------------------------------------------------------------------------------------------------------------------------------------------------------------------------------------------------------------------------------------------------------------------------------------------------------------------------------------------------|-------------|
| Syntax    | <pre> GENLIN Borg010 BY Terrain Running (ORDER=ASCENDING)  /MODEL Terrain Running Terrain*Running INTERCEPT=YES DISTRIBUTION=GAMMA LINK=LOG  /CRITERIA SCALE=MLE PCONVERGE=1E-006 (ABSOLUTE) SINGULAR=1E-012 ANALYSISTYPE=3 (WALD) CILEVEL=95 LIKELIHOOD=FULL  /EMMEANS TABLES=Terrain SCALE=ORIGINAL COMPARE=Terrain CONTRAST=PAIRWISE PADJUST=BONFERRONI  /EMMEANS TABLES=Running SCALE=ORIGINAL COMPARE=Running CONTRAST=PAIRWISE PADJUST=BONFERRONI  /EMMEANS TABLES=Terrain*Running SCALE=ORIGINAL COMPARE=Running*Terrain CONTRAST=PAIRWISE  PADJUST=BONFERRONI  /REPEATED SUBJECT=Subject SORT=YES CORRTYPE=INDEPENDENT ADJUSTCORR=YES COVB=ROBUST  /MISSING CLASSMISSING=EXCLUDE  /PRINT CPS DESCRIPTIVES MODELINFO FIT SUMMARY SOLUTION. </pre> |             |
| Resources | Processor Time                                                                                                                                                                                                                                                                                                                                                                                                                                                                                                                                                                                                                                                                                                                                           | 00:00:00.06 |
|           | Elapsed Time                                                                                                                                                                                                                                                                                                                                                                                                                                                                                                                                                                                                                                                                                                                                             | 00:00:00.07 |

### Model Information

|                                      |             |
|--------------------------------------|-------------|
| Dependent Variable                   | Borg 0-10   |
| Probability Distribution             | Gamma       |
| Link Function                        | Log         |
| Subject Effect 1                     | Subject     |
| Working Correlation Matrix Structure | Independent |

### Case Processing Summary

|          | N   | Percent |
|----------|-----|---------|
| Included | 98  | 97.0%   |
| Excluded | 3   | 3.0%    |
| Total    | 101 | 100.0%  |

### Correlated Data Summary

|                                    |                |         |    |
|------------------------------------|----------------|---------|----|
| Number of Levels                   | Subject Effect | Subject | 13 |
| Number of Subjects                 |                |         | 13 |
| Number of Measurements per Subject | Minimum        |         | 4  |
|                                    | Maximum        |         | 10 |
| Correlation Matrix Dimension       |                |         | 10 |

### Categorical Variable Information

|        |         |           | N  | Percent |
|--------|---------|-----------|----|---------|
| Factor | Terrain | Regular   | 53 | 54.1%   |
|        |         | Irregular | 45 | 45.9%   |
|        |         | Total     | 98 | 100.0%  |
|        | Running | Free      | 46 | 46.9%   |
|        |         | Nordic    | 52 | 53.1%   |
|        |         | Total     | 98 | 100.0%  |

### Continuous Variable Information

|                    |           | N  | Minimum | Maximum | Mean  | Std. Deviation |
|--------------------|-----------|----|---------|---------|-------|----------------|
| Dependent Variable | Borg 0-10 | 98 | .5      | 3.0     | 1.689 | .8419          |

### Goodness of Fit<sup>a</sup>

|                                                                                   | Value  |
|-----------------------------------------------------------------------------------|--------|
| Quasi Likelihood under Independence Model Criterion (QIC) <sup>b</sup>            | 40.599 |
| Corrected Quasi Likelihood under Independence Model Criterion (QICC) <sup>b</sup> | 35.306 |

Dependent Variable: Borg 0-10  
 Model: (Intercept), Terrain, Running, Terrain \* Running<sup>a</sup>

- a. Information criteria are in smaller-is-better form.
- b. Computed using the full log quasi-likelihood function.

### Tests of Model Effects

| Source            | Wald Chi-Square | Type III |      |
|-------------------|-----------------|----------|------|
|                   |                 | df       | Sig. |
| (Intercept)       | 21.349          | 1        | .000 |
| Terrain           | 3.300           | 1        | .069 |
| Running           | 5.483           | 1        | .019 |
| Terrain * Running | 1.190           | 1        | .275 |

Dependent Variable: Borg 0-10  
 Model: (Intercept), Terrain, Running, Terrain \* Running

### Parameter Estimates

| Parameter                          | B              | Std. Error | 95% Wald Confidence Interval |       | Hypothesis Test |
|------------------------------------|----------------|------------|------------------------------|-------|-----------------|
|                                    |                |            | Lower                        | Upper | Wald Chi-Square |
| (Intercept)                        | .673           | .1104      | .457                         | .889  | 37.139          |
| [Terrain=1.00]                     | -.162          | .1134      | -.384                        | .060  | 2.044           |
| [Terrain=2.00]                     | 0 <sup>a</sup> | .          | .                            | .     | .               |
| [Running=1.00]                     | -.085          | .0535      | -.190                        | .020  | 2.533           |
| [Running=2.00]                     | 0 <sup>a</sup> | .          | .                            | .     | .               |
| [Terrain=1.00] *<br>[Running=1.00] | -.114          | .1047      | -.319                        | .091  | 1.190           |
| [Terrain=1.00] *<br>[Running=2.00] | 0 <sup>a</sup> | .          | .                            | .     | .               |
| [Terrain=2.00] *<br>[Running=1.00] | 0 <sup>a</sup> | .          | .                            | .     | .               |
| [Terrain=2.00] *<br>[Running=2.00] | 0 <sup>a</sup> | .          | .                            | .     | .               |
| (Scale)                            | .250           |            |                              |       |                 |

### Parameter Estimates

| Parameter                          | Hypothesis Test |      |
|------------------------------------|-----------------|------|
|                                    | df              | Sig. |
| (Intercept)                        | 1               | .000 |
| [Terrain=1.00]                     | 1               | .153 |
| [Terrain=2.00]                     | .               | .    |
| [Running=1.00]                     | 1               | .112 |
| [Running=2.00]                     | .               | .    |
| [Terrain=1.00] *<br>[Running=1.00] | 1               | .275 |
| [Terrain=1.00] *<br>[Running=2.00] | .               | .    |
| [Terrain=2.00] *<br>[Running=1.00] | .               | .    |
| [Terrain=2.00] *<br>[Running=2.00] | .               | .    |
| (Scale)                            |                 |      |

Dependent Variable: Borg 0-10

Model: (Intercept), Terrain, Running, Terrain \* Running

a. Set to zero because this parameter is redundant.

### Estimated Marginal Means 1: Terrain

### Estimates

| Terrain   | Mean  | Std. Error | 95% Wald Confidence Interval |       |
|-----------|-------|------------|------------------------------|-------|
|           |       |            | Lower                        | Upper |
| Regular   | 1.509 | .2068      | 1.153                        | 1.973 |
| Irregular | 1.878 | .2214      | 1.491                        | 2.367 |

### Pairwise Comparisons

| (I) Terrain | (J) Terrain | Mean Difference (I-J) | Std. Error | df | Bonferroni Sig. | 95% Wald Confidence ... |
|-------------|-------------|-----------------------|------------|----|-----------------|-------------------------|
|             |             |                       |            |    |                 | Lower                   |
| Regular     | Irregular   | -.370                 | .2011      | 1  | .066            | -.764                   |
| Irregular   | Regular     | .370                  | .2011      | 1  | .066            | -.024                   |

### Pairwise Comparisons

| (I) Terrain | (J) Terrain | 95% Wald Confidence ... |
|-------------|-------------|-------------------------|
|             |             | Upper                   |
| Regular     | Irregular   | .024                    |
| Irregular   | Regular     | .764                    |

Pairwise comparisons of estimated marginal means based on the original scale of dependent variable Borg 0-10

### Overall Test Results

| Wald Chi-Square | df | Sig. |
|-----------------|----|------|
| 3.381           | 1  | .066 |

The Wald chi-square tests the effect of Terrain. This test is based on the linearly independent pairwise comparisons among the estimated marginal means.

## Estimated Marginal Means 2: Running

### Estimates

| Running | Mean  | Std. Error | 95% Wald Confidence Interval |       |
|---------|-------|------------|------------------------------|-------|
|         |       |            | Lower                        | Upper |
| Free    | 1.568 | .1848      | 1.244                        | 1.975 |
| Nordic  | 1.807 | .2089      | 1.441                        | 2.267 |

### Pairwise Comparisons

| (I) Running | (J) Running | Mean Difference (I-J) | Std. Error | df | Bonferroni Sig. | 95% Wald Confidence ...<br>Lower |
|-------------|-------------|-----------------------|------------|----|-----------------|----------------------------------|
| Free        | Nordic      | -.240 <sup>a</sup>    | .1050      | 1  | .022            | -.446                            |
| Nordic      | Free        | .240 <sup>a</sup>     | .1050      | 1  | .022            | .034                             |

### Pairwise Comparisons

| (I) Running | (J) Running | 95% Wald Confidence ...<br>Upper |
|-------------|-------------|----------------------------------|
| Free        | Nordic      | -.034                            |
| Nordic      | Free        | .446                             |

Pairwise comparisons of estimated marginal means based on the original scale of dependent variable Borg 0-10

a. The mean difference is significant at the .05 level.

### Overall Test Results

| Wald Chi-Square | df | Sig. |
|-----------------|----|------|
| 5.209           | 1  | .022 |

The Wald chi-square tests the effect of Running. This test is based on the linearly independent pairwise comparisons among the estimated marginal means.

### Estimated Marginal Means 3: Terrain\* Running

#### Estimates

| Terrain   | Running | Mean  | Std. Error | 95% Wald Confidence Interval |       |
|-----------|---------|-------|------------|------------------------------|-------|
|           |         |       |            | Lower                        | Upper |
| Regular   | Free    | 1.365 | .2008      | 1.024                        | 1.821 |
|           | Nordic  | 1.667 | .2413      | 1.255                        | 2.214 |
| Irregular | Free    | 1.800 | .2349      | 1.394                        | 2.325 |
|           | Nordic  | 1.960 | .2164      | 1.579                        | 2.434 |



### Pairwise Comparisons

| (I) Running*Terrain           | (J) Running*Terrain           | Mean Difference (I-J) | Std. Error | df |
|-------------------------------|-------------------------------|-----------------------|------------|----|
| [Running=1.00]*[Terrain=1.00] | [Running=1.00]*[Terrain=2.00] | -.435                 | .2323      | 1  |
|                               | [Running=2.00]*[Terrain=1.00] | -.301                 | .1562      | 1  |
|                               | [Running=2.00]*[Terrain=2.00] | -.595 <sup>a</sup>    | .2220      | 1  |
| [Running=1.00]*[Terrain=2.00] | [Running=1.00]*[Terrain=1.00] | .435                  | .2323      | 1  |
|                               | [Running=2.00]*[Terrain=1.00] | .133                  | .2235      | 1  |
|                               | [Running=2.00]*[Terrain=2.00] | -.160                 | .0950      | 1  |
| [Running=2.00]*[Terrain=1.00] | [Running=1.00]*[Terrain=1.00] | .301                  | .1562      | 1  |
|                               | [Running=1.00]*[Terrain=2.00] | -.133                 | .2235      | 1  |
|                               | [Running=2.00]*[Terrain=2.00] | -.293                 | .1969      | 1  |
| [Running=2.00]*[Terrain=2.00] | [Running=1.00]*[Terrain=1.00] | .595 <sup>a</sup>     | .2220      | 1  |
|                               | [Running=1.00]*[Terrain=2.00] | .160                  | .0950      | 1  |
|                               | [Running=2.00]*[Terrain=1.00] | .293                  | .1969      | 1  |

### Pairwise Comparisons

| (I) Running*Terrain           | (J) Running*Terrain           | Bonferroni Sig. | 95% Wald Confidence ...<br>Lower |
|-------------------------------|-------------------------------|-----------------|----------------------------------|
| [Running=1.00]*[Terrain=1.00] | [Running=1.00]*[Terrain=2.00] | .368            | -1.047                           |
|                               | [Running=2.00]*[Terrain=1.00] | .322            | -.713                            |
|                               | [Running=2.00]*[Terrain=2.00] | .044            | -1.180                           |
| [Running=1.00]*[Terrain=2.00] | [Running=1.00]*[Terrain=1.00] | .368            | -.178                            |
|                               | [Running=2.00]*[Terrain=1.00] | 1.000           | -.456                            |
|                               | [Running=2.00]*[Terrain=2.00] | .552            | -.411                            |
| [Running=2.00]*[Terrain=1.00] | [Running=1.00]*[Terrain=1.00] | .322            | -.111                            |
|                               | [Running=1.00]*[Terrain=2.00] | 1.000           | -.723                            |
|                               | [Running=2.00]*[Terrain=2.00] | .818            | -.813                            |
| [Running=2.00]*[Terrain=2.00] | [Running=1.00]*[Terrain=1.00] | .044            | .009                             |
|                               | [Running=1.00]*[Terrain=2.00] | .552            | -.091                            |
|                               | [Running=2.00]*[Terrain=1.00] | .818            | -.226                            |

### Pairwise Comparisons

|                               |                               | 95% Wald<br>Confidence ... |
|-------------------------------|-------------------------------|----------------------------|
| (I) Running*Terrain           | (J) Running*Terrain           | Upper                      |
| [Running=1.00]*[Terrain=1.00] | [Running=1.00]*[Terrain=2.00] | .178                       |
|                               | [Running=2.00]*[Terrain=1.00] | .111                       |
|                               | [Running=2.00]*[Terrain=2.00] | -.009                      |
| [Running=1.00]*[Terrain=2.00] | [Running=1.00]*[Terrain=1.00] | 1.047                      |
|                               | [Running=2.00]*[Terrain=1.00] | .723                       |
|                               | [Running=2.00]*[Terrain=2.00] | .091                       |
| [Running=2.00]*[Terrain=1.00] | [Running=1.00]*[Terrain=1.00] | .713                       |
|                               | [Running=1.00]*[Terrain=2.00] | .456                       |
|                               | [Running=2.00]*[Terrain=2.00] | .226                       |
| [Running=2.00]*[Terrain=2.00] | [Running=1.00]*[Terrain=1.00] | 1.180                      |
|                               | [Running=1.00]*[Terrain=2.00] | .411                       |
|                               | [Running=2.00]*[Terrain=1.00] | .813                       |

Pairwise comparisons of estimated marginal means based on the original scale of dependent variable Borg 0-10

- a. The mean difference is significant at the .05 level.

### Overall Test Results

| Wald Chi-Square | df | Sig. |
|-----------------|----|------|
| 9.339           | 3  | .025 |

The Wald chi-square tests the effect of Running\*Terrain. This test is based on the linearly independent pairwise comparisons among the estimated marginal means.

GENLIN Prazer5a5 BY Terrain Running (ORDER=ASCENDING)  
/MODEL Terrain Running Terrain\*Running INTERCEPT=YES

```

DISTRIBUTION=GAUSS LINK=LOG
/CRITERIA SCALE=MLE PCONVERGE=1E-006(ABSOLUTE) SINGULAR=1E-012 ANALYSISTY
PE=3(WALD) CILEVEL=95
LIKELIHOOD=FULL
/EMMEANS TABLES=Terrain SCALE=ORIGINAL COMPARE=Terrain CONTRAST=PAIRWISE
PADJUST=BONFERRONI
/EMMEANS TABLES=Running SCALE=ORIGINAL COMPARE=Running CONTRAST=PAIRWISE
PADJUST=BONFERRONI
/EMMEANS TABLES=Terrain*Running SCALE=ORIGINAL COMPARE=Running*Terrain CO
NTRAST=PAIRWISE
PADJUST=BONFERRONI
/REPEATED SUBJECT=Subject SORT=YES CORRTYPE=INDEPENDENT ADJUSTCORR=YES CO
VB=ROBUST
/MISSING CLASSMISSING=EXCLUDE
/PRINT CPS DESCRIPTIVES MODELINFO FIT SUMMARY SOLUTION.

```

## Generalized Linear Models

### Notes

|                        |                                   |                                                                                                                                |
|------------------------|-----------------------------------|--------------------------------------------------------------------------------------------------------------------------------|
| Output Created         |                                   | 30-OCT-2023 12:37:06                                                                                                           |
| Comments               |                                   |                                                                                                                                |
| Input                  | Data                              | C:<br>\Users\andre\Documents\<br>Andre\Pesquisa\Artigos<br>para Publicar\Nordic<br>Running\Data\Statistics\S<br>PSS\Scales.sav |
|                        | Active Dataset                    | DataSet5                                                                                                                       |
|                        | Filter                            | <none>                                                                                                                         |
|                        | Weight                            | <none>                                                                                                                         |
|                        | Split File                        | <none>                                                                                                                         |
|                        | N of Rows in Working Data<br>File | 101                                                                                                                            |
| Missing Value Handling | Definition of Missing             | User-defined missing<br>values for factor, subject<br>and within-subject<br>variables are treated as<br>missing.               |
|                        | Cases Used                        | Statistics are based on<br>cases with valid data for<br>all variables in the model.                                            |
| Weight Handling        |                                   | not applicable                                                                                                                 |

## Notes

|           |                                                                                                                                                                                                                                                                                                                                                                                                                                                                                                                                                                                                                                                                                                                                                                |             |
|-----------|----------------------------------------------------------------------------------------------------------------------------------------------------------------------------------------------------------------------------------------------------------------------------------------------------------------------------------------------------------------------------------------------------------------------------------------------------------------------------------------------------------------------------------------------------------------------------------------------------------------------------------------------------------------------------------------------------------------------------------------------------------------|-------------|
| Syntax    | <pre> GENLIN Prazer5a5 BY Terrain Running (ORDER=ASCENDING)  /MODEL Terrain Running Terrain*Running INTERCEPT=YES DISTRIBUTION=IGAUSS LINK=LOG  /CRITERIA SCALE=MLE PCONVERGE=1E-006 (ABSOLUTE) SINGULAR=1E-012 ANALYSISTYPE=3 (WALD) CILEVEL=95 LIKELIHOOD=FULL  /EMMEANS TABLES=Terrain SCALE=ORIGINAL COMPARE=Terrain CONTRAST=PAIRWISE PADJUST=BONFERRONI  /EMMEANS TABLES=Running SCALE=ORIGINAL COMPARE=Running CONTRAST=PAIRWISE PADJUST=BONFERRONI  /EMMEANS TABLES=Terrain*Running SCALE=ORIGINAL COMPARE=Running*Terr ain CONTRAST=PAIRWISE  PADJUST=BONFERRONI  /REPEATED SUBJECT=Subject SORT=YES CORRTYPE=INDEPEND ENT ADJUSTCORR=YES COVB=ROBUST  /MISSING CLASSMISSING=EXCLU DE  /PRINT CPS DESCRIPTIVES MODELINFO FIT SUMMARY SOLUTION. </pre> |             |
| Resources | Processor Time                                                                                                                                                                                                                                                                                                                                                                                                                                                                                                                                                                                                                                                                                                                                                 | 00:00:00.06 |
|           | Elapsed Time                                                                                                                                                                                                                                                                                                                                                                                                                                                                                                                                                                                                                                                                                                                                                   | 00:00:00.06 |

### Model Information

|                                      |                  |
|--------------------------------------|------------------|
| Dependent Variable                   | Prazer (-5 a +5) |
| Probability Distribution             | Inverse Gaussian |
| Link Function                        | Log              |
| Subject Effect 1                     | Subject          |
| Working Correlation Matrix Structure | Independent      |

### Case Processing Summary

|          | N   | Percent |
|----------|-----|---------|
| Included | 98  | 97.0%   |
| Excluded | 3   | 3.0%    |
| Total    | 101 | 100.0%  |

### Correlated Data Summary

|                                    |                |         |    |
|------------------------------------|----------------|---------|----|
| Number of Levels                   | Subject Effect | Subject | 13 |
| Number of Subjects                 |                |         | 13 |
| Number of Measurements per Subject | Minimum        |         | 4  |
|                                    | Maximum        |         | 10 |
| Correlation Matrix Dimension       |                |         | 10 |

### Categorical Variable Information

|        |         |           | N  | Percent |
|--------|---------|-----------|----|---------|
| Factor | Terrain | Regular   | 53 | 54.1%   |
|        |         | Irregular | 45 | 45.9%   |
|        |         | Total     | 98 | 100.0%  |
|        | Running | Free      | 46 | 46.9%   |
|        |         | Nordic    | 52 | 53.1%   |
|        |         | Total     | 98 | 100.0%  |

### Continuous Variable Information

|                    |                  | N  | Minimum | Maximum | Mean |
|--------------------|------------------|----|---------|---------|------|
| Dependent Variable | Prazer (-5 a +5) | 98 | 1       | 5       | 3.48 |

### Continuous Variable Information

|                    |                  | Std. Deviation |
|--------------------|------------------|----------------|
| Dependent Variable | Prazer (-5 a +5) | 1.077          |

## Goodness of Fit<sup>a</sup>

|                                                                                   | Value  |
|-----------------------------------------------------------------------------------|--------|
| Quasi Likelihood under Independence Model Criterion (QIC) <sup>b</sup>            | 9.836  |
| Corrected Quasi Likelihood under Independence Model Criterion (QICC) <sup>b</sup> | 11.873 |

Dependent Variable: Prazer (-5 a +5)

Model: (Intercept), Terrain, Running, Terrain \* Running<sup>a</sup>

- a. Information criteria are in smaller-is-better form.
- b. Computed using the full log quasi-likelihood function.

## Tests of Model Effects

| Source            | Wald Chi-Square | Type III |      |
|-------------------|-----------------|----------|------|
|                   |                 | df       | Sig. |
| (Intercept)       | 848.901         | 1        | .000 |
| Terrain           | 8.415           | 1        | .004 |
| Running           | .903            | 1        | .342 |
| Terrain * Running | .017            | 1        | .897 |

Dependent Variable: Prazer (-5 a +5)

Model: (Intercept), Terrain, Running, Terrain \* Running

### Parameter Estimates

| Parameter                          | B              | Std. Error | 95% Wald Confidence Interval |       | Hypothesis Test |
|------------------------------------|----------------|------------|------------------------------|-------|-----------------|
|                                    |                |            | Lower                        | Upper | Wald Chi-Square |
| (Intercept)                        | 1.085          | .0223      | 1.042                        | 1.129 | 2373.650        |
| [Terrain=1.00]                     | .254           | .0897      | .078                         | .430  | 7.995           |
| [Terrain=2.00]                     | 0 <sup>a</sup> | .          | .                            | .     | .               |
| [Running=1.00]                     | .030           | .0192      | -.008                        | .068  | 2.425           |
| [Running=2.00]                     | 0 <sup>a</sup> | .          | .                            | .     | .               |
| [Terrain=1.00] *<br>[Running=1.00] | .008           | .0599      | -.110                        | .125  | .017            |
| [Terrain=1.00] *<br>[Running=2.00] | 0 <sup>a</sup> | .          | .                            | .     | .               |
| [Terrain=2.00] *<br>[Running=1.00] | 0 <sup>a</sup> | .          | .                            | .     | .               |
| [Terrain=2.00] *<br>[Running=2.00] | 0 <sup>a</sup> | .          | .                            | .     | .               |
| (Scale)                            | .020           |            |                              |       |                 |

### Parameter Estimates

| Parameter                          | Hypothesis Test |      |
|------------------------------------|-----------------|------|
|                                    | df              | Sig. |
| (Intercept)                        | 1               | .000 |
| [Terrain=1.00]                     | 1               | .005 |
| [Terrain=2.00]                     | .               | .    |
| [Running=1.00]                     | 1               | .119 |
| [Running=2.00]                     | .               | .    |
| [Terrain=1.00] *<br>[Running=1.00] | 1               | .897 |
| [Terrain=1.00] *<br>[Running=2.00] | .               | .    |
| [Terrain=2.00] *<br>[Running=1.00] | .               | .    |
| [Terrain=2.00] *<br>[Running=2.00] | .               | .    |
| (Scale)                            |                 |      |

Dependent Variable: Prazer (-5 a +5)

Model: (Intercept), Terrain, Running, Terrain \* Running

a. Set to zero because this parameter is redundant.

### Estimated Marginal Means 1: Terrain



### Estimates

| Terrain   | Mean | Std. Error | 95% Wald Confidence Interval |       |
|-----------|------|------------|------------------------------|-------|
|           |      |            | Lower                        | Upper |
| Regular   | 3.89 | .325       | 3.30                         | 4.58  |
| Irregular | 3.00 | .069       | 2.87                         | 3.14  |

### Pairwise Comparisons

| (I) Terrain | (J) Terrain | Mean Difference (I-J) | Std. Error | df | Bonferroni Sig. | 95% Wald Confidence ... |
|-------------|-------------|-----------------------|------------|----|-----------------|-------------------------|
|             |             |                       |            |    |                 | Lower                   |
| Regular     | Irregular   | .88 <sup>a</sup>      | .339       | 1  | .009            | .22                     |
| Irregular   | Regular     | -.88 <sup>a</sup>     | .339       | 1  | .009            | -1.55                   |

### Pairwise Comparisons

| (I) Terrain | (J) Terrain | 95% Wald Confidence ... |
|-------------|-------------|-------------------------|
|             |             | Upper                   |
| Regular     | Irregular   | 1.55                    |
| Irregular   | Regular     | -.22                    |

Pairwise comparisons of estimated marginal means based on the original scale of dependent variable Prazer (-5 a +5)

a. The mean difference is significant at the .05 level.

### Overall Test Results

| Wald Chi-Square | df | Sig. |
|-----------------|----|------|
| 6.800           | 1  | .009 |

The Wald chi-square tests the effect of Terrain. This test is based on the linearly independent pairwise comparisons among the estimated marginal means.

## Estimated Marginal Means 2: Running

### Estimates

| Running | Mean | Std. Error | 95% Wald Confidence Interval |       |
|---------|------|------------|------------------------------|-------|
|         |      |            | Lower                        | Upper |
| Free    | 3.48 | .149       | 3.20                         | 3.78  |
| Nordic  | 3.36 | .163       | 3.06                         | 3.70  |

### Pairwise Comparisons

| (I) Running | (J) Running | Mean Difference (I-J) | Std. Error | df | Bonferroni Sig. | 95% Wald Confidence ...<br>Lower |
|-------------|-------------|-----------------------|------------|----|-----------------|----------------------------------|
| Free        | Nordic      | .12                   | .121       | 1  | .339            | -.12                             |
| Nordic      | Free        | -.12                  | .121       | 1  | .339            | -.35                             |

### Pairwise Comparisons

| (I) Running | (J) Running | 95% Wald Confidence ...<br>Upper |
|-------------|-------------|----------------------------------|
| Free        | Nordic      | .35                              |
| Nordic      | Free        | .12                              |

Pairwise comparisons of estimated marginal means based on the original scale of dependent variable Prazer (-5 a +5)

### Overall Test Results

| Wald Chi-Square | df | Sig. |
|-----------------|----|------|
| .914            | 1  | .339 |

The Wald chi-square tests the effect of Running. This test is based on the linearly independent pairwise comparisons among the estimated marginal means.

### Estimated Marginal Means 3: Terrain\* Running

#### Estimates

| Terrain   | Running | Mean | Std. Error | 95% Wald Confidence Interval |       |
|-----------|---------|------|------------|------------------------------|-------|
|           |         |      |            | Lower                        | Upper |
| Regular   | Free    | 3.96 | .347       | 3.34                         | 4.70  |
|           | Nordic  | 3.81 | .346       | 3.19                         | 4.56  |
| Irregular | Free    | 3.05 | .084       | 2.89                         | 3.22  |
|           | Nordic  | 2.96 | .066       | 2.83                         | 3.09  |

### Pairwise Comparisons

| (I) Running*Terrain           | (J) Running*Terrain           | Mean Difference (I-J) | Std. Error | df |
|-------------------------------|-------------------------------|-----------------------|------------|----|
| [Running=1.00]*[Terrain=1.00] | [Running=1.00]*[Terrain=2.00] | .91                   | .375       | 1  |
|                               | [Running=2.00]*[Terrain=1.00] | .15                   | .244       | 1  |
|                               | [Running=2.00]*[Terrain=2.00] | 1.00 <sup>a</sup>     | .353       | 1  |
| [Running=1.00]*[Terrain=2.00] | [Running=1.00]*[Terrain=1.00] | -.91                  | .375       | 1  |
|                               | [Running=2.00]*[Terrain=1.00] | -.76                  | .375       | 1  |
|                               | [Running=2.00]*[Terrain=2.00] | .09                   | .058       | 1  |
| [Running=2.00]*[Terrain=1.00] | [Running=1.00]*[Terrain=1.00] | -.15                  | .244       | 1  |
|                               | [Running=1.00]*[Terrain=2.00] | .76                   | .375       | 1  |
|                               | [Running=2.00]*[Terrain=2.00] | .85                   | .341       | 1  |
| [Running=2.00]*[Terrain=2.00] | [Running=1.00]*[Terrain=1.00] | -1.00 <sup>a</sup>    | .353       | 1  |
|                               | [Running=1.00]*[Terrain=2.00] | -.09                  | .058       | 1  |
|                               | [Running=2.00]*[Terrain=1.00] | -.85                  | .341       | 1  |

### Pairwise Comparisons

| (I) Running*Terrain           | (J) Running*Terrain           | Bonferroni Sig. | 95% Wald Confidence ...<br>Lower |
|-------------------------------|-------------------------------|-----------------|----------------------------------|
| [Running=1.00]*[Terrain=1.00] | [Running=1.00]*[Terrain=2.00] | .090            | -.08                             |
|                               | [Running=2.00]*[Terrain=1.00] | 1.000           | -.50                             |
|                               | [Running=2.00]*[Terrain=2.00] | .027            | .07                              |
| [Running=1.00]*[Terrain=2.00] | [Running=1.00]*[Terrain=1.00] | .090            | -1.90                            |
|                               | [Running=2.00]*[Terrain=1.00] | .248            | -1.75                            |
|                               | [Running=2.00]*[Terrain=2.00] | .741            | -.06                             |
| [Running=2.00]*[Terrain=1.00] | [Running=1.00]*[Terrain=1.00] | 1.000           | -.79                             |
|                               | [Running=1.00]*[Terrain=2.00] | .248            | -.22                             |
|                               | [Running=2.00]*[Terrain=2.00] | .074            | -.05                             |
| [Running=2.00]*[Terrain=2.00] | [Running=1.00]*[Terrain=1.00] | .027            | -1.93                            |
|                               | [Running=1.00]*[Terrain=2.00] | .741            | -.24                             |
|                               | [Running=2.00]*[Terrain=1.00] | .074            | -1.76                            |

### Pairwise Comparisons

|                               |                               | 95% Wald<br>Confidence ... |
|-------------------------------|-------------------------------|----------------------------|
| (I) Running*Terrain           | (J) Running*Terrain           | Upper                      |
| [Running=1.00]*[Terrain=1.00] | [Running=1.00]*[Terrain=2.00] | 1.90                       |
|                               | [Running=2.00]*[Terrain=1.00] | .79                        |
|                               | [Running=2.00]*[Terrain=2.00] | 1.93                       |
| [Running=1.00]*[Terrain=2.00] | [Running=1.00]*[Terrain=1.00] | .08                        |
|                               | [Running=2.00]*[Terrain=1.00] | .22                        |
|                               | [Running=2.00]*[Terrain=2.00] | .24                        |
| [Running=2.00]*[Terrain=1.00] | [Running=1.00]*[Terrain=1.00] | .50                        |
|                               | [Running=1.00]*[Terrain=2.00] | 1.75                       |
|                               | [Running=2.00]*[Terrain=2.00] | 1.76                       |
| [Running=2.00]*[Terrain=2.00] | [Running=1.00]*[Terrain=1.00] | -.07                       |
|                               | [Running=1.00]*[Terrain=2.00] | .06                        |
|                               | [Running=2.00]*[Terrain=1.00] | .05                        |

Pairwise comparisons of estimated marginal means based on the original scale of dependent variable Prazer (-5 a +5)

- a. The mean difference is significant at the .05 level.

### Overall Test Results

| Wald Chi-Square | df | Sig. |
|-----------------|----|------|
| 18.229          | 3  | .000 |

The Wald chi-square tests the effect of Running\*Terrain. This test is based on the linearly independent pairwise comparisons among the estimated marginal means.

# ANGULAR VARIABLES

## JOINT'S ROM - CONTACT PHASE

```
GET
  FILE='C:\Users\andre\Documents\Andre\Pesquisa\Artigos para Publicar\Nordic Running\Data\Statistics\SPSS\Angular_Parameters_Range_Swing.sav
DATASET NAME DataSet10 WINDOW=FRONT.
GET
  FILE='C:\Users\andre\Documents\Andre\Pesquisa\Artigos para Publicar\Nordic Running\Data\Statistics\SPSS\Angular_Parameters_Range_Contact.sav
DATASET NAME DataSet11 WINDOW=FRONT.
GENLIN HipFlexionRT BY Terrain Running (ORDER=ASCENDING)
  /MODEL Terrain Running Terrain*Running INTERCEPT=YES
  DISTRIBUTION=GAMMA LINK=LOG
  /CRITERIA SCALE=MLE PCONVERGE=1E-006(ABSOLUTE) SINGULAR=1E-012 ANALYSISTYPE=3(WALD) CILEVEL=95
  LIKELIHOOD=FULL
  /EMMEANS TABLES=Terrain SCALE=ORIGINAL COMPARE=Terrain CONTRAST=PAIRWISE
  PADJUST=BONFERRONI
  /EMMEANS TABLES=Running SCALE=ORIGINAL COMPARE=Running CONTRAST=PAIRWISE
  PADJUST=BONFERRONI
  /EMMEANS TABLES=Terrain*Running SCALE=ORIGINAL COMPARE=Running*Terrain CONTRAST=PAIRWISE
  PADJUST=BONFERRONI
  /REPEATED SUBJECT=Subject SORT=YES CORRTYPE=INDEPENDENT ADJUSTCORR=YES COVB=ROBUST
  /MISSING CLASSMISSING=EXCLUDE
  /PRINT CPS DESCRIPTIVES MODELINFO FIT SUMMARY SOLUTION.
```

### Generalized Linear Models

## Notes

|                        |                                |                                                                                                                                                              |
|------------------------|--------------------------------|--------------------------------------------------------------------------------------------------------------------------------------------------------------|
| Output Created         |                                | 31-OCT-2023 12:50:46                                                                                                                                         |
| Comments               |                                |                                                                                                                                                              |
| Input                  | Data                           | C:<br>\Users\andre\Documents\<br>Andre\Pesquisa\Artigos<br>para Publicar\Nordic<br>Running\Data\Statistics\S<br>PSS\Angular_Parameters<br>_Range_Contact.sav |
|                        | Active Dataset                 | DataSet11                                                                                                                                                    |
|                        | Filter                         | <none>                                                                                                                                                       |
|                        | Weight                         | <none>                                                                                                                                                       |
|                        | Split File                     | <none>                                                                                                                                                       |
|                        | N of Rows in Working Data File | 48                                                                                                                                                           |
| Missing Value Handling | Definition of Missing          | User-defined missing values for factor, subject and within-subject variables are treated as missing.                                                         |
|                        | Cases Used                     | Statistics are based on cases with valid data for all variables in the model.                                                                                |
| Weight Handling        |                                | not applicable                                                                                                                                               |

## Notes

|           |                                                                                                                                                                                                                                                                                                                                                                                                                                                                                                                                                                                                                                                                                                                                                                         |             |
|-----------|-------------------------------------------------------------------------------------------------------------------------------------------------------------------------------------------------------------------------------------------------------------------------------------------------------------------------------------------------------------------------------------------------------------------------------------------------------------------------------------------------------------------------------------------------------------------------------------------------------------------------------------------------------------------------------------------------------------------------------------------------------------------------|-------------|
| Syntax    | <pre> GENLIN HipFlexionRT BY Terrain Running (ORDER=ASCENDING)   /MODEL Terrain Running Terrain*Running INTERCEPT=YES DISTRIBUTION=GAMMA LINK=LOG   /CRITERIA SCALE=MLE PCONVERGE=1E-006 (ABSOLUTE) SINGULAR=1E-012 ANALYSISTYPE=3 (WALD) CILEVEL=95   LIKELIHOOD=FULL   /EMMEANS TABLES=Terrain SCALE=ORIGINAL COMPARE=Terrain CONTRAST=PAIRWISE PADJUST=BONFERRONI   /EMMEANS TABLES=Running SCALE=ORIGINAL COMPARE=Running CONTRAST=PAIRWISE PADJUST=BONFERRONI   /EMMEANS TABLES=Terrain*Running SCALE=ORIGINAL COMPARE=Running*Terrain CONTRAST=PAIRWISE  PADJUST=BONFERRONI   /REPEATED SUBJECT=Subject SORT=YES CORRTYPE=INDEPENDENT ADJUSTCORR=YES COVB=ROBUST   /MISSING CLASSMISSING=EXCLUDE   /PRINT CPS DESCRIPTIVES MODELINFO FIT SUMMARY SOLUTION. </pre> |             |
| Resources | Processor Time                                                                                                                                                                                                                                                                                                                                                                                                                                                                                                                                                                                                                                                                                                                                                          | 00:00:00.06 |
|           | Elapsed Time                                                                                                                                                                                                                                                                                                                                                                                                                                                                                                                                                                                                                                                                                                                                                            | 00:00:00.06 |

[DataSet11] C:\Users\andre\Documents\Andre\Pesquisa\Artigos para Publicar\Nordic Running\Data\Statistics\SPSS\Angular\_Parameters\_Range\_Contact.sav



### Model Information

|                                      |              |         |
|--------------------------------------|--------------|---------|
| Dependent Variable                   | HipFlexionRT |         |
| Probability Distribution             | Gamma        |         |
| Link Function                        | Log          |         |
| Subject Effect                       | 1            | Subject |
| Working Correlation Matrix Structure | Independent  |         |

### Case Processing Summary

|          | N  | Percent |
|----------|----|---------|
| Included | 48 | 100.0%  |
| Excluded | 0  | 0.0%    |
| Total    | 48 | 100.0%  |

### Correlated Data Summary

|                                    |                |         |    |
|------------------------------------|----------------|---------|----|
| Number of Levels                   | Subject Effect | Subject | 13 |
| Number of Subjects                 |                |         | 13 |
| Number of Measurements per Subject | Minimum        |         | 2  |
|                                    | Maximum        |         | 4  |
| Correlation Matrix Dimension       |                |         | 4  |

### Categorical Variable Information

|        |         |           | N  | Percent |
|--------|---------|-----------|----|---------|
| Factor | Terrain | Regular   | 26 | 54.2%   |
|        |         | Irregular | 22 | 45.8%   |
|        |         | Total     | 48 | 100.0%  |
|        | Running | Free      | 24 | 50.0%   |
|        |         | Nordic    | 24 | 50.0%   |
|        |         | Total     | 48 | 100.0%  |

### Continuous Variable Information

|                    |              | N  | Minimum | Maximum | Mean   | Std. Deviation |
|--------------------|--------------|----|---------|---------|--------|----------------|
| Dependent Variable | HipFlexionRT | 48 | 36.4    | 59.6    | 48.147 | 6.4037         |

## Goodness of Fit<sup>a</sup>

|                                                                                   | Value |
|-----------------------------------------------------------------------------------|-------|
| Quasi Likelihood under Independence Model Criterion (QIC) <sup>b</sup>            | 8.482 |
| Corrected Quasi Likelihood under Independence Model Criterion (QICC) <sup>b</sup> | 8.767 |

Dependent Variable: HipFlexionRT  
 Model: (Intercept), Terrain, Running,  
 Terrain \* Running

- a. Information criteria are in smaller-is-better form.
- b. Computed using the full log quasi-likelihood function.

## Tests of Model Effects

| Source            | Wald Chi-Square | Type III |      |
|-------------------|-----------------|----------|------|
|                   |                 | df       | Sig. |
| (Intercept)       | 15690.853       | 1        | .000 |
| Terrain           | 10.215          | 1        | .001 |
| Running           | .000            | 1        | .985 |
| Terrain * Running | .003            | 1        | .957 |

Dependent Variable: HipFlexionRT  
 Model: (Intercept), Terrain, Running, Terrain \* Running

### Parameter Estimates

| Parameter                           | B              | Std. Error | 95% Wald Confidence Interval |       | Hypothesis Test |
|-------------------------------------|----------------|------------|------------------------------|-------|-----------------|
|                                     |                |            | Lower                        | Upper | Wald Chi-Square |
| (Intercept)                         | 3.920          | .0343      | 3.853                        | 3.988 | 13084.590       |
| [Terrain=1.000]                     | -.087          | .0271      | -.140                        | -.034 | 10.307          |
| [Terrain=2.000]                     | 0 <sup>a</sup> | .          | .                            | .     | .               |
| [Running=1.00]                      | .001           | .0200      | -.038                        | .040  | .003            |
| [Running=2.00]                      | 0 <sup>a</sup> | .          | .                            | .     | .               |
| [Terrain=1.000] *<br>[Running=1.00] | -.002          | .0313      | -.063                        | .060  | .003            |
| [Terrain=1.000] *<br>[Running=2.00] | 0 <sup>a</sup> | .          | .                            | .     | .               |
| [Terrain=2.000] *<br>[Running=1.00] | 0 <sup>a</sup> | .          | .                            | .     | .               |
| [Terrain=2.000] *<br>[Running=2.00] | 0 <sup>a</sup> | .          | .                            | .     | .               |
| (Scale)                             | .017           |            |                              |       |                 |

### Parameter Estimates

| Parameter                           | Hypothesis Test |      |
|-------------------------------------|-----------------|------|
|                                     | df              | Sig. |
| (Intercept)                         | 1               | .000 |
| [Terrain=1.000]                     | 1               | .001 |
| [Terrain=2.000]                     | .               | .    |
| [Running=1.00]                      | 1               | .954 |
| [Running=2.00]                      | .               | .    |
| [Terrain=1.000] *<br>[Running=1.00] | 1               | .957 |
| [Terrain=1.000] *<br>[Running=2.00] | .               | .    |
| [Terrain=2.000] *<br>[Running=1.00] | .               | .    |
| [Terrain=2.000] *<br>[Running=2.00] | .               | .    |
| (Scale)                             |                 |      |

Dependent Variable: HipFlexionRT

Model: (Intercept), Terrain, Running, Terrain \* Running

a. Set to zero because this parameter is redundant.

### Estimated Marginal Means 1: Terrain

### Estimates

| Terrain   | Mean   | Std. Error | 95% Wald Confidence Interval |        |
|-----------|--------|------------|------------------------------|--------|
|           |        |            | Lower                        | Upper  |
| Regular   | 46.201 | 1.5351     | 43.288                       | 49.310 |
| Irregular | 50.447 | 1.7403     | 47.149                       | 53.976 |

### Pairwise Comparisons

| (I) Terrain | (J) Terrain | Mean Difference (I-J) | Std. Error | df | Bonferroni Sig. | 95% Wald Confidence ... |
|-------------|-------------|-----------------------|------------|----|-----------------|-------------------------|
|             |             |                       |            |    |                 | Lower                   |
| Regular     | Irregular   | -4.245 <sup>a</sup>   | 1.3422     | 1  | .002            | -6.876                  |
| Irregular   | Regular     | 4.245 <sup>a</sup>    | 1.3422     | 1  | .002            | 1.615                   |

### Pairwise Comparisons

| (I) Terrain | (J) Terrain | 95% Wald Confidence ... |
|-------------|-------------|-------------------------|
|             |             | Upper                   |
| Regular     | Irregular   | -1.615                  |
| Irregular   | Regular     | 6.876                   |

Pairwise comparisons of estimated marginal means based on the original scale of dependent variable HipFlexionRT

a. The mean difference is significant at the .05 level.

### Overall Test Results

| Wald Chi-Square | df | Sig. |
|-----------------|----|------|
| 10.004          | 1  | .002 |

The Wald chi-square tests the effect of Terrain. This test is based on the linearly independent pairwise comparisons among the estimated marginal means.

## Estimated Marginal Means 2: Running

### Estimates

| Running | Mean   | Std. Error | 95% Wald Confidence Interval |        |
|---------|--------|------------|------------------------------|--------|
|         |        |            | Lower                        | Upper  |
| Free    | 48.285 | 1.5503     | 45.340                       | 51.422 |
| Nordic  | 48.270 | 1.5499     | 45.326                       | 51.405 |

### Pairwise Comparisons

| (I) Running | (J) Running | Mean Difference (I-J) | Std. Error | df | Bonferroni Sig. | 95% Wald Confidence ...<br>Lower |
|-------------|-------------|-----------------------|------------|----|-----------------|----------------------------------|
| Free        | Nordic      | .016                  | .8250      | 1  | .985            | -1.601                           |
| Nordic      | Free        | -.016                 | .8250      | 1  | .985            | -1.632                           |

### Pairwise Comparisons

| (I) Running | (J) Running | 95% Wald Confidence ...<br>Upper |
|-------------|-------------|----------------------------------|
| Free        | Nordic      | 1.632                            |
| Nordic      | Free        | 1.601                            |

Pairwise comparisons of estimated marginal means based on the original scale of dependent variable HipFlexionRT

### Overall Test Results

| Wald Chi-Square | df | Sig. |
|-----------------|----|------|
| .000            | 1  | .985 |

The Wald chi-square tests the effect of Running. This test is based on the linearly independent pairwise comparisons among the estimated marginal means.

### Estimated Marginal Means 3: Terrain\* Running

#### Estimates

| Terrain   | Running | Mean   | Std. Error | 95% Wald Confidence Interval |        |
|-----------|---------|--------|------------|------------------------------|--------|
|           |         |        |            | Lower                        | Upper  |
| Regular   | Free    | 46.190 | 1.6589     | 43.050                       | 49.558 |
|           | Nordic  | 46.213 | 1.6372     | 43.113                       | 49.536 |
| Irregular | Free    | 50.476 | 1.8922     | 46.900                       | 54.324 |
|           | Nordic  | 50.418 | 1.7279     | 47.142                       | 53.921 |

### Pairwise Comparisons

| (I) Running*Terrain            | (J) Running*Terrain            | Mean Difference (I-J) | Std. Error | df |
|--------------------------------|--------------------------------|-----------------------|------------|----|
| [Running=1.00]*[Terrain=1.000] | [Running=1.00]*[Terrain=2.000] | -4.286                | 1.7325     | 1  |
|                                | [Running=2.00]*[Terrain=1.000] | -.024                 | 1.1993     | 1  |
|                                | [Running=2.00]*[Terrain=2.000] | -4.228 <sup>a</sup>   | 1.5267     | 1  |
| [Running=1.00]*[Terrain=2.000] | [Running=1.00]*[Terrain=1.000] | 4.286                 | 1.7325     | 1  |
|                                | [Running=2.00]*[Terrain=1.000] | 4.263                 | 1.6157     | 1  |
|                                | [Running=2.00]*[Terrain=2.000] | .058                  | 1.0084     | 1  |
| [Running=2.00]*[Terrain=1.000] | [Running=1.00]*[Terrain=1.000] | .024                  | 1.1993     | 1  |
|                                | [Running=1.00]*[Terrain=2.000] | -4.263                | 1.6157     | 1  |
|                                | [Running=2.00]*[Terrain=2.000] | -4.204 <sup>a</sup>   | 1.3111     | 1  |
| [Running=2.00]*[Terrain=2.000] | [Running=1.00]*[Terrain=1.000] | 4.228 <sup>a</sup>    | 1.5267     | 1  |
|                                | [Running=1.00]*[Terrain=2.000] | -.058                 | 1.0084     | 1  |
|                                | [Running=2.00]*[Terrain=1.000] | 4.204 <sup>a</sup>    | 1.3111     | 1  |

### Pairwise Comparisons

| (I) Running*Terrain            | (J) Running*Terrain            | Bonferroni Sig. | 95% Wald Confidence ...<br>Lower |
|--------------------------------|--------------------------------|-----------------|----------------------------------|
| [Running=1.00]*[Terrain=1.000] | [Running=1.00]*[Terrain=2.000] | .080            | -8.857                           |
|                                | [Running=2.00]*[Terrain=1.000] | 1.000           | -3.188                           |
|                                | [Running=2.00]*[Terrain=2.000] | .034            | -8.256                           |
| [Running=1.00]*[Terrain=2.000] | [Running=1.00]*[Terrain=1.000] | .080            | -.284                            |
|                                | [Running=2.00]*[Terrain=1.000] | .050            | .000                             |
|                                | [Running=2.00]*[Terrain=2.000] | 1.000           | -2.602                           |
| [Running=2.00]*[Terrain=1.000] | [Running=1.00]*[Terrain=1.000] | 1.000           | -3.140                           |
|                                | [Running=1.00]*[Terrain=2.000] | .050            | -8.525                           |
|                                | [Running=2.00]*[Terrain=2.000] | .008            | -7.664                           |
| [Running=2.00]*[Terrain=2.000] | [Running=1.00]*[Terrain=1.000] | .034            | .200                             |
|                                | [Running=1.00]*[Terrain=2.000] | 1.000           | -2.719                           |
|                                | [Running=2.00]*[Terrain=1.000] | .008            | .745                             |

### Pairwise Comparisons

| (I) Running*Terrain            | (J) Running*Terrain            | 95% Wald<br>Confidence ... |
|--------------------------------|--------------------------------|----------------------------|
|                                |                                | Upper                      |
| [Running=1.00]*[Terrain=1.000] | [Running=1.00]*[Terrain=2.000] | .284                       |
|                                | [Running=2.00]*[Terrain=1.000] | 3.140                      |
|                                | [Running=2.00]*[Terrain=2.000] | -.200                      |
| [Running=1.00]*[Terrain=2.000] | [Running=1.00]*[Terrain=1.000] | 8.857                      |
|                                | [Running=2.00]*[Terrain=1.000] | 8.525                      |
|                                | [Running=2.00]*[Terrain=2.000] | 2.719                      |
| [Running=2.00]*[Terrain=1.000] | [Running=1.00]*[Terrain=1.000] | 3.188                      |
|                                | [Running=1.00]*[Terrain=2.000] | .000                       |
|                                | [Running=2.00]*[Terrain=2.000] | -.745                      |
| [Running=2.00]*[Terrain=2.000] | [Running=1.00]*[Terrain=1.000] | 8.256                      |
|                                | [Running=1.00]*[Terrain=2.000] | 2.602                      |
|                                | [Running=2.00]*[Terrain=1.000] | 7.664                      |

Pairwise comparisons of estimated marginal means based on the original scale of dependent variable HipFlexionRT

- a. The mean difference is significant at the .05 level.

### Overall Test Results

| Wald Chi-Square | df | Sig. |
|-----------------|----|------|
| 11.177          | 3  | .011 |

The Wald chi-square tests the effect of Running\*Terrain. This test is based on the linearly independent pairwise comparisons among the estimated marginal means.

GENLIN KneeFlexionRT BY Terrain Running (ORDER=ASCENDING)



```

/MODEL Terrain Running Terrain*Running INTERCEPT=YES
DISTRIBUTION=GAMMA LINK=LOG
/CRITERIA SCALE=MLE PCONVERGE=1E-006(ABSOLUTE) SINGULAR=1E-012 ANALYSISTY
PE=3(WALD) CILEVEL=95
    LIKELIHOOD=FULL
/EMMEANS TABLES=Terrain SCALE=ORIGINAL COMPARE=Terrain CONTRAST=PAIRWISE
PADJUST=BONFERRONI
/EMMEANS TABLES=Running SCALE=ORIGINAL COMPARE=Running CONTRAST=PAIRWISE
PADJUST=BONFERRONI
/EMMEANS TABLES=Terrain*Running SCALE=ORIGINAL COMPARE=Running*Terrain CO
NTRAST=PAIRWISE
    PADJUST=BONFERRONI
/REPEATED SUBJECT=Subject SORT=YES CORRTYPE=INDEPENDENT ADJUSTCORR=YES CO
VB=ROBUST
/MISSING CLASSMISSING=EXCLUDE
/PRINT CPS DESCRIPTIVES MODELINFO FIT SUMMARY SOLUTION.

```

## Generalized Linear Models

### Notes

|                        |                                |                                                                                                                                                              |
|------------------------|--------------------------------|--------------------------------------------------------------------------------------------------------------------------------------------------------------|
| Output Created         | 31-OCT-2023 12:50:46           |                                                                                                                                                              |
| Comments               |                                |                                                                                                                                                              |
| Input                  | Data                           | C:<br>\Users\andre\Documents\<br>Andre\Pesquisa\Artigos<br>para Publicar\Nordic<br>Running\Data\Statistics\S<br>PSS\Angular_Parameters<br>_Range_Contact.sav |
|                        | Active Dataset                 | DataSet11                                                                                                                                                    |
|                        | Filter                         | <none>                                                                                                                                                       |
|                        | Weight                         | <none>                                                                                                                                                       |
|                        | Split File                     | <none>                                                                                                                                                       |
|                        | N of Rows in Working Data File | 48                                                                                                                                                           |
| Missing Value Handling | Definition of Missing          | User-defined missing values for factor, subject and within-subject variables are treated as missing.                                                         |
|                        | Cases Used                     | Statistics are based on cases with valid data for all variables in the model.                                                                                |
| Weight Handling        | not applicable                 |                                                                                                                                                              |

## Notes

|           |                                                                                                                                                                                                                                                                                                                                                                                                                                                                                                                                                                                                                                                                                                                                                    |             |
|-----------|----------------------------------------------------------------------------------------------------------------------------------------------------------------------------------------------------------------------------------------------------------------------------------------------------------------------------------------------------------------------------------------------------------------------------------------------------------------------------------------------------------------------------------------------------------------------------------------------------------------------------------------------------------------------------------------------------------------------------------------------------|-------------|
| Syntax    | <pre> GENLIN KneeFlexionRT BY Terrain Running (ORDER=ASCENDING)  /MODEL Terrain Running Terrain*Running INTERCEPT=YES  DISTRIBUTION=GAMMA LINK=LOG  /CRITERIA SCALE=MLE PCONVERGE=1E-006 (ABSOLUTE) SINGULAR=1E-012 ANALYSISTYPE=3 (WALD) CILEVEL=95  LIKELIHOOD=FULL  /EMMEANS TABLES=Terrain SCALE=ORIGINAL COMPARE=Terrain CONTRAST=PAIRWISE PADJUST=BONFERRONI  /EMMEANS TABLES=Running SCALE=ORIGINAL COMPARE=Running CONTRAST=PAIRWISE PADJUST=BONFERRONI  /EMMEANS TABLES=Terrain*Running SCALE=ORIGINAL COMPARE=Running*Terrain CONTRAST=PAIRWISE  PADJUST=BONFERRONI  /REPEATED SUBJECT=Subject SORT=YES CORRTYPE=INDEPENDENT ADJUSTCORR=YES COVB=ROBUST  /MISSING CLASSMISSING=EXCLUDE  /PRINT CPS DESCRIPTIVES MODELINFO FIT ... </pre> |             |
| Resources | Processor Time                                                                                                                                                                                                                                                                                                                                                                                                                                                                                                                                                                                                                                                                                                                                     | 00:00:00.06 |
|           | Elapsed Time                                                                                                                                                                                                                                                                                                                                                                                                                                                                                                                                                                                                                                                                                                                                       | 00:00:00.06 |

### Model Information

|                                      |               |
|--------------------------------------|---------------|
| Dependent Variable                   | KneeFlexionRT |
| Probability Distribution             | Gamma         |
| Link Function                        | Log           |
| Subject Effect 1                     | Subject       |
| Working Correlation Matrix Structure | Independent   |

### Case Processing Summary

|          | N  | Percent |
|----------|----|---------|
| Included | 48 | 100.0%  |
| Excluded | 0  | 0.0%    |
| Total    | 48 | 100.0%  |

### Correlated Data Summary

|                                    |                |         |    |
|------------------------------------|----------------|---------|----|
| Number of Levels                   | Subject Effect | Subject | 13 |
| Number of Subjects                 |                |         | 13 |
| Number of Measurements per Subject | Minimum        |         | 2  |
|                                    | Maximum        |         | 4  |
| Correlation Matrix Dimension       |                |         | 4  |

### Categorical Variable Information

|        |         |           | N  | Percent |
|--------|---------|-----------|----|---------|
| Factor | Terrain | Regular   | 26 | 54.2%   |
|        |         | Irregular | 22 | 45.8%   |
|        |         | Total     | 48 | 100.0%  |
|        | Running | Free      | 24 | 50.0%   |
|        |         | Nordic    | 24 | 50.0%   |
|        |         | Total     | 48 | 100.0%  |

### Continuous Variable Information

|                    |               | N  | Minimum | Maximum | Mean   |
|--------------------|---------------|----|---------|---------|--------|
| Dependent Variable | KneeFlexionRT | 48 | 20.6    | 37.7    | 29.379 |

### Continuous Variable Information

|                    |               | Std. Deviation |
|--------------------|---------------|----------------|
| Dependent Variable | KneeFlexionRT | 3.9128         |

### Goodness of Fit<sup>a</sup>

|                                                                                   | Value |
|-----------------------------------------------------------------------------------|-------|
| Quasi Likelihood under Independence Model Criterion (QIC) <sup>b</sup>            | 8.570 |
| Corrected Quasi Likelihood under Independence Model Criterion (QICC) <sup>b</sup> | 8.688 |

Dependent Variable: KneeFlexionRT  
Model: (Intercept), Terrain, Running,  
Terrain \* Running

- a. Information criteria are in smaller-is-better form.
- b. Computed using the full log quasi-likelihood function.

### Tests of Model Effects

| Source            | Wald Chi-Square | Type III |      |
|-------------------|-----------------|----------|------|
|                   |                 | df       | Sig. |
| (Intercept)       | 13547.117       | 1        | .000 |
| Terrain           | 13.076          | 1        | .000 |
| Running           | 5.004           | 1        | .025 |
| Terrain * Running | .021            | 1        | .885 |

Dependent Variable: KneeFlexionRT  
Model: (Intercept), Terrain, Running, Terrain \* Running

### Parameter Estimates

| Parameter                           | B              | Std. Error | 95% Wald Confidence Interval |       | Hypothesis Test |
|-------------------------------------|----------------|------------|------------------------------|-------|-----------------|
|                                     |                |            | Lower                        | Upper | Wald Chi-Square |
| (Intercept)                         | 3.454          | .0316      | 3.392                        | 3.516 | 11928.944       |
| [Terrain=1.000]                     | -.109          | .0288      | -.165                        | -.052 | 14.239          |
| [Terrain=2.000]                     | 0 <sup>a</sup> | .          | .                            | .     | .               |
| [Running=1.00]                      | -.032          | .0216      | -.074                        | .011  | 2.131           |
| [Running=2.00]                      | 0 <sup>a</sup> | .          | .                            | .     | .               |
| [Terrain=1.000] *<br>[Running=1.00] | -.004          | .0279      | -.059                        | .051  | .021            |
| [Terrain=1.000] *<br>[Running=2.00] | 0 <sup>a</sup> | .          | .                            | .     | .               |
| [Terrain=2.000] *<br>[Running=1.00] | 0 <sup>a</sup> | .          | .                            | .     | .               |
| [Terrain=2.000] *<br>[Running=2.00] | 0 <sup>a</sup> | .          | .                            | .     | .               |
| (Scale)                             | .015           |            |                              |       |                 |

### Parameter Estimates

| Parameter                           | Hypothesis Test |      |
|-------------------------------------|-----------------|------|
|                                     | df              | Sig. |
| (Intercept)                         | 1               | .000 |
| [Terrain=1.000]                     | 1               | .000 |
| [Terrain=2.000]                     | .               | .    |
| [Running=1.00]                      | 1               | .144 |
| [Running=2.00]                      | .               | .    |
| [Terrain=1.000] *<br>[Running=1.00] | 1               | .885 |
| [Terrain=1.000] *<br>[Running=2.00] | .               | .    |
| [Terrain=2.000] *<br>[Running=1.00] | .               | .    |
| [Terrain=2.000] *<br>[Running=2.00] | .               | .    |
| (Scale)                             |                 |      |

Dependent Variable: KneeFlexionRT

Model: (Intercept), Terrain, Running, Terrain \* Running

a. Set to zero because this parameter is redundant.

### Estimated Marginal Means 1: Terrain

### Estimates

| Terrain   | Mean   | Std. Error | 95% Wald Confidence Interval |        |
|-----------|--------|------------|------------------------------|--------|
|           |        |            | Lower                        | Upper  |
| Regular   | 27.881 | .8704      | 26.226                       | 29.640 |
| Irregular | 31.140 | 1.0709     | 29.110                       | 33.312 |

### Pairwise Comparisons

| (I) Terrain | (J) Terrain | Mean Difference (I-J) | Std. Error | df | Bonferroni Sig. | 95% Wald Confidence ... |
|-------------|-------------|-----------------------|------------|----|-----------------|-------------------------|
|             |             |                       |            |    |                 | Lower                   |
| Regular     | Irregular   | -3.259 <sup>a</sup>   | .9181      | 1  | .000            | -5.059                  |
| Irregular   | Regular     | 3.259 <sup>a</sup>    | .9181      | 1  | .000            | 1.460                   |

### Pairwise Comparisons

| (I) Terrain | (J) Terrain | 95% Wald Confidence ... |
|-------------|-------------|-------------------------|
|             |             | Upper                   |
| Regular     | Irregular   | -1.460                  |
| Irregular   | Regular     | 5.059                   |

Pairwise comparisons of estimated marginal means based on the original scale of dependent variable KneeFlexionRT

a. The mean difference is significant at the .05 level.

### Overall Test Results

| Wald Chi-Square | df | Sig. |
|-----------------|----|------|
| 12.600          | 1  | .000 |

The Wald chi-square tests the effect of Terrain. This test is based on the linearly independent pairwise comparisons among the estimated marginal means.

## Estimated Marginal Means 2: Running

### Estimates

| Running | Mean   | Std. Error | 95% Wald Confidence Interval |        |
|---------|--------|------------|------------------------------|--------|
|         |        |            | Lower                        | Upper  |
| Free    | 28.975 | .9610      | 27.151                       | 30.921 |
| Nordic  | 29.965 | .7942      | 28.448                       | 31.562 |

### Pairwise Comparisons

| (I) Running | (J) Running | Mean Difference (I-J) | Std. Error | df | Bonferroni Sig. | 95% Wald Confidence ...<br>Lower |
|-------------|-------------|-----------------------|------------|----|-----------------|----------------------------------|
| Free        | Nordic      | -.990 <sup>a</sup>    | .4302      | 1  | .021            | -1.833                           |
| Nordic      | Free        | .990 <sup>a</sup>     | .4302      | 1  | .021            | .147                             |

### Pairwise Comparisons

| (I) Running | (J) Running | 95% Wald Confidence ...<br>Upper |
|-------------|-------------|----------------------------------|
| Free        | Nordic      | -.147                            |
| Nordic      | Free        | 1.833                            |

Pairwise comparisons of estimated marginal means based on the original scale of dependent variable KneeFlexionRT

a. The mean difference is significant at the .05 level.

### Overall Test Results

| Wald Chi-Square | df | Sig. |
|-----------------|----|------|
| 5.294           | 1  | .021 |

The Wald chi-square tests the effect of Running. This test is based on the linearly independent pairwise comparisons among the estimated marginal means.

### Estimated Marginal Means 3: Terrain\* Running

#### Estimates

| Terrain   | Running | Mean   | Std. Error | 95% Wald Confidence Interval |        |
|-----------|---------|--------|------------|------------------------------|--------|
|           |         |        |            | Lower                        | Upper  |
| Regular   | Free    | 27.389 | .9940      | 25.509                       | 29.408 |
|           | Nordic  | 28.382 | .8120      | 26.834                       | 30.019 |
| Irregular | Free    | 30.653 | 1.2257     | 28.342                       | 33.152 |
|           | Nordic  | 31.636 | 1.0005     | 29.734                       | 33.659 |

### Pairwise Comparisons

| (I) Running*Terrain            | (J) Running*Terrain            | Mean Difference (I-J) | Std. Error | df |
|--------------------------------|--------------------------------|-----------------------|------------|----|
| [Running=1.00]*[Terrain=1.000] | [Running=1.00]*[Terrain=2.000] | -3.263 <sup>a</sup>   | 1.1155     | 1  |
|                                | [Running=2.00]*[Terrain=1.000] | -.993                 | .5266      | 1  |
|                                | [Running=2.00]*[Terrain=2.000] | -4.247 <sup>a</sup>   | .8774      | 1  |
| [Running=1.00]*[Terrain=2.000] | [Running=1.00]*[Terrain=1.000] | 3.263 <sup>a</sup>    | 1.1155     | 1  |
|                                | [Running=2.00]*[Terrain=1.000] | 2.271                 | 1.1337     | 1  |
|                                | [Running=2.00]*[Terrain=2.000] | -.983                 | .6606      | 1  |
| [Running=2.00]*[Terrain=1.000] | [Running=1.00]*[Terrain=1.000] | .993                  | .5266      | 1  |
|                                | [Running=1.00]*[Terrain=2.000] | -2.271                | 1.1337     | 1  |
|                                | [Running=2.00]*[Terrain=2.000] | -3.254 <sup>a</sup>   | .8776      | 1  |
| [Running=2.00]*[Terrain=2.000] | [Running=1.00]*[Terrain=1.000] | 4.247 <sup>a</sup>    | .8774      | 1  |
|                                | [Running=1.00]*[Terrain=2.000] | .983                  | .6606      | 1  |
|                                | [Running=2.00]*[Terrain=1.000] | 3.254 <sup>a</sup>    | .8776      | 1  |



### Pairwise Comparisons

| (I) Running*Terrain            | (J) Running*Terrain            | Bonferroni Sig. | 95% Wald Confidence ...<br>Lower |
|--------------------------------|--------------------------------|-----------------|----------------------------------|
| [Running=1.00]*[Terrain=1.000] | [Running=1.00]*[Terrain=2.000] | .021            | -6.206                           |
|                                | [Running=2.00]*[Terrain=1.000] | .356            | -2.382                           |
|                                | [Running=2.00]*[Terrain=2.000] | .000            | -6.561                           |
| [Running=1.00]*[Terrain=2.000] | [Running=1.00]*[Terrain=1.000] | .021            | .320                             |
|                                | [Running=2.00]*[Terrain=1.000] | .271            | -.720                            |
|                                | [Running=2.00]*[Terrain=2.000] | .820            | -2.726                           |
| [Running=2.00]*[Terrain=1.000] | [Running=1.00]*[Terrain=1.000] | .356            | -.396                            |
|                                | [Running=1.00]*[Terrain=2.000] | .271            | -5.262                           |
|                                | [Running=2.00]*[Terrain=2.000] | .001            | -5.569                           |
| [Running=2.00]*[Terrain=2.000] | [Running=1.00]*[Terrain=1.000] | .000            | 1.932                            |
|                                | [Running=1.00]*[Terrain=2.000] | .820            | -.760                            |
|                                | [Running=2.00]*[Terrain=1.000] | .001            | .938                             |

### Pairwise Comparisons

|                                |                                | 95% Wald<br>Confidence ... |
|--------------------------------|--------------------------------|----------------------------|
| (I) Running*Terrain            | (J) Running*Terrain            | Upper                      |
| [Running=1.00]*[Terrain=1.000] | [Running=1.00]*[Terrain=2.000] | -.320                      |
|                                | [Running=2.00]*[Terrain=1.000] | .396                       |
|                                | [Running=2.00]*[Terrain=2.000] | -1.932                     |
| [Running=1.00]*[Terrain=2.000] | [Running=1.00]*[Terrain=1.000] | 6.206                      |
|                                | [Running=2.00]*[Terrain=1.000] | 5.262                      |
|                                | [Running=2.00]*[Terrain=2.000] | .760                       |
| [Running=2.00]*[Terrain=1.000] | [Running=1.00]*[Terrain=1.000] | 2.382                      |
|                                | [Running=1.00]*[Terrain=2.000] | .720                       |
|                                | [Running=2.00]*[Terrain=2.000] | -.938                      |
| [Running=2.00]*[Terrain=2.000] | [Running=1.00]*[Terrain=1.000] | 6.561                      |
|                                | [Running=1.00]*[Terrain=2.000] | 2.726                      |
|                                | [Running=2.00]*[Terrain=1.000] | 5.569                      |

Pairwise comparisons of estimated marginal means based on the original scale of dependent variable KneeFlexionRT

- a. The mean difference is significant at the .05 level.

### Overall Test Results

| Wald Chi-Square | df | Sig. |
|-----------------|----|------|
| 26.256          | 3  | .000 |

The Wald chi-square tests the effect of Running\*Terrain. This test is based on the linearly independent pairwise comparisons among the estimated marginal means.

GENLIN AnkleDorsiflexionRTBY Terrain Running (ORDER=ASCENDING)

```

/MODEL Terrain Running Terrain*Running INTERCEPT=YES
DISTRIBUTION=GAMMA LINK=LOG
/CRITERIA SCALE=MLE PCONVERGE=1E-006(ABSOLUTE) SINGULAR=1E-012 ANALYSISTY
PE=3(WALD) CILEVEL=95
    LIKELIHOOD=FULL
/EMMEANS TABLES=Terrain SCALE=ORIGINAL COMPARE=Terrain CONTRAST=PAIRWISE
PADJUST=BONFERRONI
/EMMEANS TABLES=Running SCALE=ORIGINAL COMPARE=Running CONTRAST=PAIRWISE
PADJUST=BONFERRONI
/EMMEANS TABLES=Terrain*Running SCALE=ORIGINAL COMPARE=Running CONTRAST=PA
AIRWISE
    PADJUST=BONFERRONI
/EMMEANS TABLES=Terrain*Running SCALE=ORIGINAL COMPARE=Terrain CONTRAST=PA
IRWISE
    PADJUST=BONFERRONI
/REPEATED SUBJECT=Subject SORT=YES CORRTYPE=INDEPENDENT ADJUSTCORR=YES CO
VB=ROBUST
/MISSING CLASSMISSING=EXCLUDE
/PRINT CPS DESCRIPTIVES MODELINFO FIT SUMMARY SOLUTION.

```

## Generalized Linear Models

### Notes

|                        |                                |                                                                                                                                                              |
|------------------------|--------------------------------|--------------------------------------------------------------------------------------------------------------------------------------------------------------|
| Output Created         |                                | 31-OCT-2023 12:50:46                                                                                                                                         |
| Comments               |                                |                                                                                                                                                              |
| Input                  | Data                           | C:<br>\Users\andre\Documents\<br>Andre\Pesquisa\Artigos<br>para Publicar\Nordic<br>Running\Data\Statistics\S<br>PSS\Angular_Parameters<br>_Range_Contact.sav |
|                        | Active Dataset                 | DataSet11                                                                                                                                                    |
|                        | Filter                         | <none>                                                                                                                                                       |
|                        | Weight                         | <none>                                                                                                                                                       |
|                        | Split File                     | <none>                                                                                                                                                       |
|                        | N of Rows in Working Data File | 48                                                                                                                                                           |
| Missing Value Handling | Definition of Missing          | User-defined missing values for factor, subject and within-subject variables are treated as missing.                                                         |
|                        | Cases Used                     | Statistics are based on cases with valid data for all variables in the model.                                                                                |
| Weight Handling        |                                | not applicable                                                                                                                                               |

## Notes

Syntax

```
GENLIN
AnkleDorsiflexionRT BY
Terrain Running
(ORDER=ASCENDING)
 /MODEL Terrain Running
Terrain*Running
INTERCEPT=YES
DISTRIBUTION=GAMMA
LINK=LOG
 /CRITERIA SCALE=MLE
PCONVERGE=1E-006
(ABSOLUTE)
SINGULAR=1E-012
ANALYSISTYPE=3
(WALD) CILEVEL=95
 LIKELIHOOD=FULL
 /EMMEANS
TABLES=Terrain
SCALE=ORIGINAL
COMPARE=Terrain
CONTRAST=PAIRWISE
PADJUST=BONFERRONI
 /EMMEANS
TABLES=Running
SCALE=ORIGINAL
COMPARE=Running
CONTRAST=PAIRWISE
PADJUST=BONFERRONI
 /EMMEANS
TABLES=Terrain*Running
SCALE=ORIGINAL
COMPARE=Running
CONTRAST=PAIRWISE

PADJUST=BONFERRONI
 /EMMEANS
TABLES=Terrain*Running
SCALE=ORIGINAL
COMPARE=Terrain
CONTRAST=PAIRWISE

PADJUST=BONFERRONI
 /REPEATED
SUBJECT=Subject
SORT=YES
CORRTYPE=INDEPENDENT
ADJUSTCORR=YES
COVB=ROBUST
 /MISSING
CLASSMISSING=EXCLUDE
 /PRINT CPS
DESCRIPTIVES
MODELINFO FIT
SUMMARY SOLUTION.
```

## Notes

|           |                |             |
|-----------|----------------|-------------|
| Resources | Processor Time | 00:00:00.05 |
|           | Elapsed Time   | 00:00:00.05 |

## Model Information

|                                      |                     |
|--------------------------------------|---------------------|
| Dependent Variable                   | AnkleDorsiflexionRT |
| Probability Distribution             | Gamma               |
| Link Function                        | Log                 |
| Subject Effect 1                     | Subject             |
| Working Correlation Matrix Structure | Independent         |

## Case Processing Summary

|          | N  | Percent |
|----------|----|---------|
| Included | 48 | 100.0%  |
| Excluded | 0  | 0.0%    |
| Total    | 48 | 100.0%  |

## Correlated Data Summary

|                                    |                |         |    |
|------------------------------------|----------------|---------|----|
| Number of Levels                   | Subject Effect | Subject | 13 |
| Number of Subjects                 |                |         | 13 |
| Number of Measurements per Subject | Minimum        |         | 2  |
|                                    | Maximum        |         | 4  |
| Correlation Matrix Dimension       |                |         | 4  |

## Categorical Variable Information

|        |         |           | N  | Percent |
|--------|---------|-----------|----|---------|
| Factor | Terrain | Regular   | 26 | 54.2%   |
|        |         | Irregular | 22 | 45.8%   |
|        |         | Total     | 48 | 100.0%  |
|        | Running | Free      | 24 | 50.0%   |
|        |         | Nordic    | 24 | 50.0%   |
|        |         | Total     | 48 | 100.0%  |

## Continuous Variable Information

|                    |                     | N  | Minimum | Maximum | Mean   |
|--------------------|---------------------|----|---------|---------|--------|
| Dependent Variable | AnkleDorsiflexionRT | 48 | 23.9    | 48.1    | 39.749 |

## Continuous Variable Information

| Dependent Variable | AnkleDorsiflexionRT | Std. Deviation |
|--------------------|---------------------|----------------|
|                    |                     | 4.9350         |

### Goodness of Fit<sup>a</sup>

|                                                                                   | Value |
|-----------------------------------------------------------------------------------|-------|
| Quasi Likelihood under Independence Model Criterion (QIC) <sup>b</sup>            | 7.692 |
| Corrected Quasi Likelihood under Independence Model Criterion (QICC) <sup>b</sup> | 8.745 |

Dependent Variable:  
AnkleDorsiflexionRT  
Model: (Intercept), Terrain, Running,  
Terrain \* Running

- a. Information criteria are in smaller-is-better form.
- b. Computed using the full log quasi-likelihood function.

### Tests of Model Effects

| Source            | Wald Chi-Square | Type III |      |
|-------------------|-----------------|----------|------|
|                   |                 | df       | Sig. |
| (Intercept)       | 16235.371       | 1        | .000 |
| Terrain           | 5.114           | 1        | .024 |
| Running           | .061            | 1        | .806 |
| Terrain * Running | 16.959          | 1        | .000 |

Dependent Variable: AnkleDorsiflexionRT  
Model: (Intercept), Terrain, Running, Terrain \* Running

### Parameter Estimates

| Parameter                           | B              | Std. Error | 95% Wald Confidence Interval |       | Hypothesis Test |
|-------------------------------------|----------------|------------|------------------------------|-------|-----------------|
|                                     |                |            | Lower                        | Upper | Wald Chi-Square |
| (Intercept)                         | 3.686          | .0289      | 3.630                        | 3.743 | 16263.768       |
| [Terrain=1.000]                     | .000           | .0332      | -.065                        | .065  | .000            |
| [Terrain=2.000]                     | 0 <sup>a</sup> | .          | .                            | .     | .               |
| [Running=1.00]                      | .051           | .0234      | .005                         | .097  | 4.738           |
| [Running=2.00]                      | 0 <sup>a</sup> | .          | .                            | .     | .               |
| [Terrain=1.000] *<br>[Running=1.00] | -.111          | .0269      | -.163                        | -.058 | 16.959          |
| [Terrain=1.000] *<br>[Running=2.00] | 0 <sup>a</sup> | .          | .                            | .     | .               |
| [Terrain=2.000] *<br>[Running=1.00] | 0 <sup>a</sup> | .          | .                            | .     | .               |
| [Terrain=2.000] *<br>[Running=2.00] | 0 <sup>a</sup> | .          | .                            | .     | .               |
| (Scale)                             | .015           |            |                              |       |                 |

### Parameter Estimates

| Parameter                           | Hypothesis Test |      |
|-------------------------------------|-----------------|------|
|                                     | df              | Sig. |
| (Intercept)                         | 1               | .000 |
| [Terrain=1.000]                     | 1               | .997 |
| [Terrain=2.000]                     | .               | .    |
| [Running=1.00]                      | 1               | .030 |
| [Running=2.00]                      | .               | .    |
| [Terrain=1.000] *<br>[Running=1.00] | 1               | .000 |
| [Terrain=1.000] *<br>[Running=2.00] | .               | .    |
| [Terrain=2.000] *<br>[Running=1.00] | .               | .    |
| [Terrain=2.000] *<br>[Running=2.00] | .               | .    |
| (Scale)                             |                 |      |

Dependent Variable: AnkleDorsiflexionRT

Model: (Intercept), Terrain, Running, Terrain \* Running

a. Set to zero because this parameter is redundant.

### Estimated Marginal Means 1: Terrain

### Estimates

| Terrain   | Mean   | Std. Error | 95% Wald Confidence Interval |        |
|-----------|--------|------------|------------------------------|--------|
|           |        |            | Lower                        | Upper  |
| Regular   | 38.723 | 1.3233     | 36.214                       | 41.405 |
| Irregular | 40.929 | 1.1609     | 38.716                       | 43.269 |

### Pairwise Comparisons

| (I) Terrain | (J) Terrain | Mean Difference (I-J) | Std. Error | df | Bonferroni Sig. | 95% Wald Confidence ... |
|-------------|-------------|-----------------------|------------|----|-----------------|-------------------------|
|             |             |                       |            |    |                 | Lower                   |
| Regular     | Irregular   | -2.207 <sup>a</sup>   | .9617      | 1  | .022            | -4.092                  |
| Irregular   | Regular     | 2.207 <sup>a</sup>    | .9617      | 1  | .022            | .322                    |

### Pairwise Comparisons

| (I) Terrain | (J) Terrain | 95% Wald Confidence ... |
|-------------|-------------|-------------------------|
|             |             | Upper                   |
| Regular     | Irregular   | -.322                   |
| Irregular   | Regular     | 4.092                   |

Pairwise comparisons of estimated marginal means based on the original scale of dependent variable AnkleDorsiflexionRT

a. The mean difference is significant at the .05 level.

### Overall Test Results

| Wald Chi-Square | df | Sig. |
|-----------------|----|------|
| 5.265           | 1  | .022 |

The Wald chi-square tests the effect of Terrain. This test is based on the linearly independent pairwise comparisons among the estimated marginal means.

## Estimated Marginal Means 2: Running

### Estimates

| Running | Mean   | Std. Error | 95% Wald Confidence Interval |        |
|---------|--------|------------|------------------------------|--------|
|         |        |            | Lower                        | Upper  |
| Free    | 39.725 | 1.3039     | 37.250                       | 42.365 |
| Nordic  | 39.896 | 1.0895     | 37.817                       | 42.089 |



### Pairwise Comparisons

| (I) Running | (J) Running | Mean Difference (I-J) | Std. Error | df | Bonferroni Sig. | 95% Wald Confidence ...<br>Lower |
|-------------|-------------|-----------------------|------------|----|-----------------|----------------------------------|
| Free        | Nordic      | -.170                 | .6903      | 1  | .805            | -1.523                           |
| Nordic      | Free        | .170                  | .6903      | 1  | .805            | -1.183                           |

### Pairwise Comparisons

| (I) Running | (J) Running | 95% Wald Confidence ...<br>Upper |
|-------------|-------------|----------------------------------|
| Free        | Nordic      | 1.183                            |
| Nordic      | Free        | 1.523                            |

Pairwise comparisons of estimated marginal means based on the original scale of dependent variable AnkleDorsiflexionRT

### Overall Test Results

| Wald Chi-Square | df | Sig. |
|-----------------|----|------|
| .061            | 1  | .805 |

The Wald chi-square tests the effect of Running. This test is based on the linearly independent pairwise comparisons among the estimated marginal means.

### Estimated Marginal Means 3: Terrain\* Running

#### Estimates

| Terrain   | Running | Mean   | Std. Error | 95% Wald Confidence Interval |        |
|-----------|---------|--------|------------|------------------------------|--------|
|           |         |        |            | Lower                        | Upper  |
| Regular   | Free    | 37.586 | 1.3738     | 34.987                       | 40.377 |
|           | Nordic  | 39.894 | 1.3861     | 37.267                       | 42.705 |
| Irregular | Free    | 41.987 | 1.3595     | 39.405                       | 44.738 |
|           | Nordic  | 39.898 | 1.1533     | 37.701                       | 42.224 |

### Pairwise Comparisons

| Terrain   | (I) Running | (J) Running | Mean Difference (I-J) | Std. Error | df | Bonferroni Sig. |
|-----------|-------------|-------------|-----------------------|------------|----|-----------------|
| Regular   | Free        | Nordic      | -2.308 <sup>a</sup>   | .7861      | 1  | .003            |
|           | Nordic      | Free        | 2.308 <sup>a</sup>    | .7861      | 1  | .003            |
| Irregular | Free        | Nordic      | 2.089 <sup>a</sup>    | .9711      | 1  | .031            |
|           | Nordic      | Free        | -2.089 <sup>a</sup>   | .9711      | 1  | .031            |

### Pairwise Comparisons

| Terrain   | (I) Running | (J) Running | 95% Wald Confidence Interval for Difference |       |
|-----------|-------------|-------------|---------------------------------------------|-------|
|           |             |             | Lower                                       | Upper |
| Regular   | Free        | Nordic      | -3.848                                      | -.767 |
|           | Nordic      | Free        | .767                                        | 3.848 |
| Irregular | Free        | Nordic      | .185                                        | 3.992 |
|           | Nordic      | Free        | -3.992                                      | -.185 |

Pairwise comparisons of estimated marginal means based on the original scale of dependent variable AnkleDorsiflexionRT

a. The mean difference is significant at the .05 level.

### Overall Test Results

| Terrain   | Wald Chi-Square | df | Sig. |
|-----------|-----------------|----|------|
| Regular   | 8.618           | 1  | .003 |
| Irregular | 4.627           | 1  | .031 |

Each Wald chi-square tests the simple effects of Running within each level combination of the other factors shown. These tests are based on the linearly independent pairwise comparisons among the estimated marginal means.

### Estimated Marginal Means 4: Terrain\* Running

#### Estimates

| Terrain   | Running | Mean   | Std. Error | 95% Wald Confidence Interval |        |
|-----------|---------|--------|------------|------------------------------|--------|
|           |         |        |            | Lower                        | Upper  |
| Regular   | Free    | 37.586 | 1.3738     | 34.987                       | 40.377 |
|           | Nordic  | 39.894 | 1.3861     | 37.267                       | 42.705 |
| Irregular | Free    | 41.987 | 1.3595     | 39.405                       | 44.738 |
|           | Nordic  | 39.898 | 1.1533     | 37.701                       | 42.224 |

### Pairwise Comparisons

| Running | (I) Terrain | (J) Terrain | Mean Difference (I-J) | Std. Error | df | Bonferroni Sig. |
|---------|-------------|-------------|-----------------------|------------|----|-----------------|
| Free    | Regular     | Irregular   | -4.401 <sup>a</sup>   | .8354      | 1  | .000            |
|         | Irregular   | Regular     | 4.401 <sup>a</sup>    | .8354      | 1  | .000            |
| Nordic  | Regular     | Irregular   | -.005                 | 1.3247     | 1  | .997            |
|         | Irregular   | Regular     | .005                  | 1.3247     | 1  | .997            |

### Pairwise Comparisons

| Running | (I) Terrain | (J) Terrain | 95% Wald Confidence Interval for Difference |        |
|---------|-------------|-------------|---------------------------------------------|--------|
|         |             |             | Lower                                       | Upper  |
| Free    | Regular     | Irregular   | -6.039                                      | -2.764 |
|         | Irregular   | Regular     | 2.764                                       | 6.039  |
| Nordic  | Regular     | Irregular   | -2.601                                      | 2.592  |
|         | Irregular   | Regular     | -2.592                                      | 2.601  |

Pairwise comparisons of estimated marginal means based on the original scale of dependent variable AnkleDorsiflexionRT

a. The mean difference is significant at the .05 level.

### Overall Test Results

| Running | Wald Chi-Square | df | Sig. |
|---------|-----------------|----|------|
| Free    | 27.753          | 1  | .000 |
| Nordic  | .000            | 1  | .997 |

Each Wald chi-square tests the simple effects of Terrain within each level combination of the other factors shown. These tests are based on the linearly independent pairwise comparisons among the estimated marginal means.

```

DATASET ACTIVATE DataSet10.
GENLIN HipFlexionRT BY Terrain Running (ORDER=ASCENDING)
  /MODEL Terrain Running Terrain*Running INTERCEPT=YES
  DISTRIBUTION=GAMMA LINK=LOG
  /CRITERIA SCALE=MLE PCONVERGE=1E-006(ABSOLUTE) SINGULAR=1E-012 ANALYSISITY
PE=3(WALD) CILEVEL=95
  LIKELIHOOD=FULL
  /EMMEANS TABLES=Terrain SCALE=ORIGINAL COMPARE=Terrain CONTRAST=PAIRWISE
PADJUST=BONFERRONI
    
```

```

/EMMEANS TABLES=Running SCALE=ORIGINAL COMPARE=Running CONTRAST=PAIRWISE
PADJUST=BONFERRONI
/EMMEANS TABLES=Terrain*Running SCALE=ORIGINAL COMPARE=Running*Terrain CO
NTRAST=PAIRWISE
PADJUST=BONFERRONI
/REPEATED SUBJECT=Subject SORT=YES CORRTYPE=INDEPENDENT ADJUSTCORR=YES CO
VB=ROBUST
/MISSING CLASSMISSING<EXCLUDE
/PRINT CPS DESCRIPTIVES MODELINFO FIT SUMMARY SOLUTION.

```

## JOINT'S ROM - AERIAL PHASE

### Generalized Linear Models

#### Notes

|                        |                                |                                                                                                                                                            |
|------------------------|--------------------------------|------------------------------------------------------------------------------------------------------------------------------------------------------------|
| Output Created         |                                | 31-OCT-2023 12:51:48                                                                                                                                       |
| Comments               |                                |                                                                                                                                                            |
| Input                  | Data                           | C:<br>\Users\andre\Documents\<br>Andre\Pesquisa\Artigos<br>para Publicar\Nordic<br>Running\Data\Statistics\S<br>PSS\Angular_Parameters<br>_Range_Swing.sav |
|                        | Active Dataset                 | DataSet10                                                                                                                                                  |
|                        | Filter                         | <none>                                                                                                                                                     |
|                        | Weight                         | <none>                                                                                                                                                     |
|                        | Split File                     | <none>                                                                                                                                                     |
|                        | N of Rows in Working Data File | 48                                                                                                                                                         |
| Missing Value Handling | Definition of Missing          | User-defined missing values for factor, subject and within-subject variables are treated as missing.                                                       |
|                        | Cases Used                     | Statistics are based on cases with valid data for all variables in the model.                                                                              |
| Weight Handling        |                                | not applicable                                                                                                                                             |

## Notes

|           |                                                                                                                                                                                                                                                                                                                                                                                                                                                                                                                                                                                                                                                                                                                                                                         |             |
|-----------|-------------------------------------------------------------------------------------------------------------------------------------------------------------------------------------------------------------------------------------------------------------------------------------------------------------------------------------------------------------------------------------------------------------------------------------------------------------------------------------------------------------------------------------------------------------------------------------------------------------------------------------------------------------------------------------------------------------------------------------------------------------------------|-------------|
| Syntax    | <pre> GENLIN HipFlexionRT BY Terrain Running (ORDER=ASCENDING)   /MODEL Terrain Running Terrain*Running INTERCEPT=YES DISTRIBUTION=GAMMA LINK=LOG   /CRITERIA SCALE=MLE PCONVERGE=1E-006 (ABSOLUTE) SINGULAR=1E-012 ANALYSISTYPE=3 (WALD) CILEVEL=95   LIKELIHOOD=FULL   /EMMEANS TABLES=Terrain SCALE=ORIGINAL COMPARE=Terrain CONTRAST=PAIRWISE PADJUST=BONFERRONI   /EMMEANS TABLES=Running SCALE=ORIGINAL COMPARE=Running CONTRAST=PAIRWISE PADJUST=BONFERRONI   /EMMEANS TABLES=Terrain*Running SCALE=ORIGINAL COMPARE=Running*Terrain CONTRAST=PAIRWISE  PADJUST=BONFERRONI   /REPEATED SUBJECT=Subject SORT=YES CORRTYPE=INDEPENDENT ADJUSTCORR=YES COVB=ROBUST   /MISSING CLASSMISSING=EXCLUDE   /PRINT CPS DESCRIPTIVES MODELINFO FIT SUMMARY SOLUTION. </pre> |             |
| Resources | Processor Time                                                                                                                                                                                                                                                                                                                                                                                                                                                                                                                                                                                                                                                                                                                                                          | 00:00:00.08 |
|           | Elapsed Time                                                                                                                                                                                                                                                                                                                                                                                                                                                                                                                                                                                                                                                                                                                                                            | 00:00:00.07 |

[DataSet10] C:\Users\andre\Documents\Andre\Pesquisa\Artigos para Publicar\Nordic Running\Data\Statistics\SPSS\Angular\_Parameters\_Range\_Swing.sav

### Model Information

|                                      |              |         |
|--------------------------------------|--------------|---------|
| Dependent Variable                   | HipFlexionRT |         |
| Probability Distribution             | Gamma        |         |
| Link Function                        | Log          |         |
| Subject Effect                       | 1            | Subject |
| Working Correlation Matrix Structure | Independent  |         |

### Case Processing Summary

|          | N  | Percent |
|----------|----|---------|
| Included | 48 | 100.0%  |
| Excluded | 0  | 0.0%    |
| Total    | 48 | 100.0%  |

### Correlated Data Summary

|                                    |                |         |    |
|------------------------------------|----------------|---------|----|
| Number of Levels                   | Subject Effect | Subject | 13 |
| Number of Subjects                 |                |         | 13 |
| Number of Measurements per Subject | Minimum        |         | 2  |
|                                    | Maximum        |         | 4  |
| Correlation Matrix Dimension       |                |         | 4  |

### Categorical Variable Information

|        |         |           | N  | Percent |
|--------|---------|-----------|----|---------|
| Factor | Terrain | Regular   | 26 | 54.2%   |
|        |         | Irregular | 22 | 45.8%   |
|        |         | Total     | 48 | 100.0%  |
|        | Running | Free      | 24 | 50.0%   |
|        |         | Nordic    | 24 | 50.0%   |
|        |         | Total     | 48 | 100.0%  |

### Continuous Variable Information

|                    |              | N  | Minimum | Maximum | Mean   | Std. Deviation |
|--------------------|--------------|----|---------|---------|--------|----------------|
| Dependent Variable | HipFlexionRT | 48 | 48.3    | 85.1    | 67.902 | 10.9066        |

### Goodness of Fit<sup>a</sup>

|                                                                                   | Value |
|-----------------------------------------------------------------------------------|-------|
| Quasi Likelihood under Independence Model Criterion (QIC) <sup>b</sup>            | 8.426 |
| Corrected Quasi Likelihood under Independence Model Criterion (QICC) <sup>b</sup> | 8.890 |

Dependent Variable: HipFlexionRT  
 Model: (Intercept), Terrain, Running,  
 Terrain \* Running

- a. Information criteria are in smaller-is-better form.
- b. Computed using the full log quasi-likelihood function.

### Tests of Model Effects

| Source            | Wald Chi-Square | Type III |      |
|-------------------|-----------------|----------|------|
|                   |                 | df       | Sig. |
| (Intercept)       | 18546.813       | 1        | .000 |
| Terrain           | 35.982          | 1        | .000 |
| Running           | .546            | 1        | .460 |
| Terrain * Running | .596            | 1        | .440 |

Dependent Variable: HipFlexionRT  
 Model: (Intercept), Terrain, Running, Terrain \* Running

### Parameter Estimates

| Parameter                          | B              | Std. Error | 95% Wald Confidence Interval |       | Hypothesis Test |
|------------------------------------|----------------|------------|------------------------------|-------|-----------------|
|                                    |                |            | Lower                        | Upper | Wald Chi-Square |
| (Intercept)                        | 4.310          | .0270      | 4.257                        | 4.363 | 25522.516       |
| [Terrain=1.00]                     | -.195          | .0332      | -.260                        | -.130 | 34.493          |
| [Terrain=2.00]                     | 0 <sup>a</sup> | .          | .                            | .     | .               |
| [Running=1.00]                     | .005           | .0161      | -.027                        | .036  | .088            |
| [Running=2.00]                     | 0 <sup>a</sup> | .          | .                            | .     | .               |
| [Terrain=1.00] *<br>[Running=1.00] | .026           | .0338      | -.040                        | .092  | .596            |
| [Terrain=1.00] *<br>[Running=2.00] | 0 <sup>a</sup> | .          | .                            | .     | .               |
| [Terrain=2.00] *<br>[Running=1.00] | 0 <sup>a</sup> | .          | .                            | .     | .               |
| [Terrain=2.00] *<br>[Running=2.00] | 0 <sup>a</sup> | .          | .                            | .     | .               |
| (Scale)                            | .020           |            |                              |       |                 |

### Parameter Estimates

| Parameter                          | Hypothesis Test |      |
|------------------------------------|-----------------|------|
|                                    | df              | Sig. |
| (Intercept)                        | 1               | .000 |
| [Terrain=1.00]                     | 1               | .000 |
| [Terrain=2.00]                     | .               | .    |
| [Running=1.00]                     | 1               | .767 |
| [Running=2.00]                     | .               | .    |
| [Terrain=1.00] *<br>[Running=1.00] | 1               | .440 |
| [Terrain=1.00] *<br>[Running=2.00] | .               | .    |
| [Terrain=2.00] *<br>[Running=1.00] | .               | .    |
| [Terrain=2.00] *<br>[Running=2.00] | .               | .    |
| (Scale)                            |                 |      |

Dependent Variable: HipFlexionRT

Model: (Intercept), Terrain, Running, Terrain \* Running

a. Set to zero because this parameter is redundant.

### Estimated Marginal Means 1: Terrain



### Estimates

| Terrain   | Mean   | Std. Error | 95% Wald Confidence Interval |        |
|-----------|--------|------------|------------------------------|--------|
|           |        |            | Lower                        | Upper  |
| Regular   | 62.212 | 2.4671     | 57.560                       | 67.241 |
| Irregular | 74.618 | 2.1217     | 70.573                       | 78.894 |

### Pairwise Comparisons

| (I) Terrain | (J) Terrain | Mean Difference (I-J) | Std. Error | df | Bonferroni Sig. | 95% Wald Confidence ... |
|-------------|-------------|-----------------------|------------|----|-----------------|-------------------------|
|             |             |                       |            |    |                 | Lower                   |
| Regular     | Irregular   | -12.405 <sup>a</sup>  | 1.9493     | 1  | .000            | -16.226                 |
| Irregular   | Regular     | 12.405 <sup>a</sup>   | 1.9493     | 1  | .000            | 8.585                   |

### Pairwise Comparisons

| (I) Terrain | (J) Terrain | 95% Wald Confidence ... |
|-------------|-------------|-------------------------|
|             |             | Upper                   |
| Regular     | Irregular   | -8.585                  |
| Irregular   | Regular     | 16.226                  |

Pairwise comparisons of estimated marginal means based on the original scale of dependent variable HipFlexionRT

a. The mean difference is significant at the .05 level.

### Overall Test Results

| Wald Chi-Square | df | Sig. |
|-----------------|----|------|
| 40.500          | 1  | .000 |

The Wald chi-square tests the effect of Terrain. This test is based on the linearly independent pairwise comparisons among the estimated marginal means.

## Estimated Marginal Means 2: Running

### Estimates

| Running | Mean   | Std. Error | 95% Wald Confidence Interval |        |
|---------|--------|------------|------------------------------|--------|
|         |        |            | Lower                        | Upper  |
| Free    | 68.743 | 2.5381     | 63.944                       | 73.902 |
| Nordic  | 67.529 | 1.9672     | 63.782                       | 71.497 |

### Pairwise Comparisons

| (I) Running | (J) Running | Mean Difference (I-J) | Std. Error | df | Bonferroni Sig. | 95% Wald Confidence ...<br>Lower |
|-------------|-------------|-----------------------|------------|----|-----------------|----------------------------------|
| Free        | Nordic      | 1.213                 | 1.6547     | 1  | .463            | -2.030                           |
| Nordic      | Free        | -1.213                | 1.6547     | 1  | .463            | -4.456                           |

### Pairwise Comparisons

| (I) Running | (J) Running | 95% Wald Confidence ...<br>Upper |
|-------------|-------------|----------------------------------|
| Free        | Nordic      | 4.456                            |
| Nordic      | Free        | 2.030                            |

Pairwise comparisons of estimated marginal means based on the original scale of dependent variable HipFlexionRT

### Overall Test Results

| Wald Chi-Square | df | Sig. |
|-----------------|----|------|
| .538            | 1  | .463 |

The Wald chi-square tests the effect of Running. This test is based on the linearly independent pairwise comparisons among the estimated marginal means.

### Estimated Marginal Means 3: Terrain\* Running

#### Estimates

| Terrain   | Running | Mean   | Std. Error | 95% Wald Confidence Interval |        |
|-----------|---------|--------|------------|------------------------------|--------|
|           |         |        |            | Lower                        | Upper  |
| Regular   | Free    | 63.179 | 3.0697     | 57.440                       | 69.492 |
|           | Nordic  | 61.260 | 2.3882     | 56.754                       | 66.125 |
| Irregular | Free    | 74.796 | 2.3879     | 70.259                       | 79.626 |
|           | Nordic  | 74.440 | 2.0083     | 70.606                       | 78.482 |

### Pairwise Comparisons

| (I) Running*Terrain           | (J) Running*Terrain           | Mean Difference (I-J) | Std. Error | df |
|-------------------------------|-------------------------------|-----------------------|------------|----|
| [Running=1.00]*[Terrain=1.00] | [Running=1.00]*[Terrain=2.00] | -11.617 <sup>a</sup>  | 2.3086     | 1  |
|                               | [Running=2.00]*[Terrain=1.00] | 1.919                 | 2.4083     | 1  |
|                               | [Running=2.00]*[Terrain=2.00] | -11.261 <sup>a</sup>  | 2.3664     | 1  |
| [Running=1.00]*[Terrain=2.00] | [Running=1.00]*[Terrain=1.00] | 11.617 <sup>a</sup>   | 2.3086     | 1  |
|                               | [Running=2.00]*[Terrain=1.00] | 13.536 <sup>a</sup>   | 2.6479     | 1  |
|                               | [Running=2.00]*[Terrain=2.00] | .356                  | 1.2066     | 1  |
| [Running=2.00]*[Terrain=1.00] | [Running=1.00]*[Terrain=1.00] | -1.919                | 2.4083     | 1  |
|                               | [Running=1.00]*[Terrain=2.00] | -13.536 <sup>a</sup>  | 2.6479     | 1  |
|                               | [Running=2.00]*[Terrain=2.00] | -13.180 <sup>a</sup>  | 2.1230     | 1  |
| [Running=2.00]*[Terrain=2.00] | [Running=1.00]*[Terrain=1.00] | 11.261 <sup>a</sup>   | 2.3664     | 1  |
|                               | [Running=1.00]*[Terrain=2.00] | -.356                 | 1.2066     | 1  |
|                               | [Running=2.00]*[Terrain=1.00] | 13.180 <sup>a</sup>   | 2.1230     | 1  |

### Pairwise Comparisons

| (I) Running*Terrain           | (J) Running*Terrain           | Bonferroni Sig. | 95% Wald Confidence ...<br>Lower |
|-------------------------------|-------------------------------|-----------------|----------------------------------|
| [Running=1.00]*[Terrain=1.00] | [Running=1.00]*[Terrain=2.00] | .000            | -17.707                          |
|                               | [Running=2.00]*[Terrain=1.00] | 1.000           | -4.435                           |
|                               | [Running=2.00]*[Terrain=2.00] | .000            | -17.504                          |
| [Running=1.00]*[Terrain=2.00] | [Running=1.00]*[Terrain=1.00] | .000            | 5.526                            |
|                               | [Running=2.00]*[Terrain=1.00] | .000            | 6.550                            |
|                               | [Running=2.00]*[Terrain=2.00] | 1.000           | -2.827                           |
| [Running=2.00]*[Terrain=1.00] | [Running=1.00]*[Terrain=1.00] | 1.000           | -8.272                           |
|                               | [Running=1.00]*[Terrain=2.00] | .000            | -20.522                          |
|                               | [Running=2.00]*[Terrain=2.00] | .000            | -18.780                          |
| [Running=2.00]*[Terrain=2.00] | [Running=1.00]*[Terrain=1.00] | .000            | 5.018                            |
|                               | [Running=1.00]*[Terrain=2.00] | 1.000           | -3.540                           |
|                               | [Running=2.00]*[Terrain=1.00] | .000            | 7.579                            |

### Pairwise Comparisons

| (I) Running*Terrain           | (J) Running*Terrain           | 95% Wald Confidence ...<br>Upper |
|-------------------------------|-------------------------------|----------------------------------|
| [Running=1.00]*[Terrain=1.00] | [Running=1.00]*[Terrain=2.00] | -5.526                           |
|                               | [Running=2.00]*[Terrain=1.00] | 8.272                            |
|                               | [Running=2.00]*[Terrain=2.00] | -5.018                           |
| [Running=1.00]*[Terrain=2.00] | [Running=1.00]*[Terrain=1.00] | 17.707                           |
|                               | [Running=2.00]*[Terrain=1.00] | 20.522                           |
|                               | [Running=2.00]*[Terrain=2.00] | 3.540                            |
| [Running=2.00]*[Terrain=1.00] | [Running=1.00]*[Terrain=1.00] | 4.435                            |
|                               | [Running=1.00]*[Terrain=2.00] | -6.550                           |
|                               | [Running=2.00]*[Terrain=2.00] | -7.579                           |
| [Running=2.00]*[Terrain=2.00] | [Running=1.00]*[Terrain=1.00] | 17.504                           |
|                               | [Running=1.00]*[Terrain=2.00] | 2.827                            |
|                               | [Running=2.00]*[Terrain=1.00] | 18.780                           |

Pairwise comparisons of estimated marginal means based on the original scale of dependent variable HipFlexionRT

- a. The mean difference is significant at the .05 level.

### Overall Test Results

| Wald Chi-Square | df | Sig. |
|-----------------|----|------|
| 43.931          | 3  | .000 |

The Wald chi-square tests the effect of Running\*Terrain. This test is based on the linearly independent pairwise comparisons among the estimated marginal means.

GENLIN KneeFlexionRT BY Terrain Running (ORDER=ASCENDING)

```

/MODEL Terrain Running Terrain*Running INTERCEPT=YES
DISTRIBUTION=GAMMA LINK=LOG
/CRITERIA SCALE=MLE PCONVERGE=1E-006(ABSOLUTE) SINGULAR=1E-012 ANALYSISTY
PE=3(WALD) CILEVEL=95
    LIKELIHOOD=FULL
/EMMEANS TABLES=Terrain SCALE=ORIGINAL COMPARE=Terrain CONTRAST=PAIRWISE
PADJUST=BONFERRONI
/EMMEANS TABLES=Running SCALE=ORIGINAL COMPARE=Running CONTRAST=PAIRWISE
PADJUST=BONFERRONI
/EMMEANS TABLES=Terrain*Running SCALE=ORIGINAL COMPARE=Running*Terrain CO
NTRAST=PAIRWISE
    PADJUST=BONFERRONI
/REPEATED SUBJECT=Subject SORT=YES CORRTYPE=INDEPENDENT ADJUSTCORR=YES CO
VB=ROBUST
/MISSING CLASSMISSING=EXCLUDE
/PRINT CPS DESCRIPTIVES MODELINFO FIT SUMMARY SOLUTION.

```

## Generalized Linear Models

### Notes

|                        |                                |                                                                                                                                                            |
|------------------------|--------------------------------|------------------------------------------------------------------------------------------------------------------------------------------------------------|
| Output Created         | 31-OCT-2023 12:51:48           |                                                                                                                                                            |
| Comments               |                                |                                                                                                                                                            |
| Input                  | Data                           | C:<br>\Users\andre\Documents\<br>Andre\Pesquisa\Artigos<br>para Publicar\Nordic<br>Running\Data\Statistics\S<br>PSS\Angular_Parameters<br>_Range_Swing.sav |
|                        | Active Dataset                 | DataSet10                                                                                                                                                  |
|                        | Filter                         | <none>                                                                                                                                                     |
|                        | Weight                         | <none>                                                                                                                                                     |
|                        | Split File                     | <none>                                                                                                                                                     |
|                        | N of Rows in Working Data File | 48                                                                                                                                                         |
| Missing Value Handling | Definition of Missing          | User-defined missing values for factor, subject and within-subject variables are treated as missing.                                                       |
|                        | Cases Used                     | Statistics are based on cases with valid data for all variables in the model.                                                                              |
| Weight Handling        | not applicable                 |                                                                                                                                                            |

## Notes

|           |                                                                                                                                                                                                                                                                                                                                                                                                                                                                                                                                                                                                                                                                                                                                                    |             |
|-----------|----------------------------------------------------------------------------------------------------------------------------------------------------------------------------------------------------------------------------------------------------------------------------------------------------------------------------------------------------------------------------------------------------------------------------------------------------------------------------------------------------------------------------------------------------------------------------------------------------------------------------------------------------------------------------------------------------------------------------------------------------|-------------|
| Syntax    | <pre> GENLIN KneeFlexionRT BY Terrain Running (ORDER=ASCENDING)  /MODEL Terrain Running Terrain*Running INTERCEPT=YES  DISTRIBUTION=GAMMA LINK=LOG  /CRITERIA SCALE=MLE PCONVERGE=1E-006 (ABSOLUTE) SINGULAR=1E-012 ANALYSISTYPE=3 (WALD) CILEVEL=95  LIKELIHOOD=FULL  /EMMEANS TABLES=Terrain SCALE=ORIGINAL COMPARE=Terrain CONTRAST=PAIRWISE PADJUST=BONFERRONI  /EMMEANS TABLES=Running SCALE=ORIGINAL COMPARE=Running CONTRAST=PAIRWISE PADJUST=BONFERRONI  /EMMEANS TABLES=Terrain*Running SCALE=ORIGINAL COMPARE=Running*Terrain CONTRAST=PAIRWISE  PADJUST=BONFERRONI  /REPEATED SUBJECT=Subject SORT=YES CORRTYPE=INDEPENDENT ADJUSTCORR=YES COVB=ROBUST  /MISSING CLASSMISSING=EXCLUDE  /PRINT CPS DESCRIPTIVES MODELINFO FIT ... </pre> |             |
| Resources | Processor Time                                                                                                                                                                                                                                                                                                                                                                                                                                                                                                                                                                                                                                                                                                                                     | 00:00:00.05 |
|           | Elapsed Time                                                                                                                                                                                                                                                                                                                                                                                                                                                                                                                                                                                                                                                                                                                                       | 00:00:00.06 |

### Model Information

|                                      |               |
|--------------------------------------|---------------|
| Dependent Variable                   | KneeFlexionRT |
| Probability Distribution             | Gamma         |
| Link Function                        | Log           |
| Subject Effect 1                     | Subject       |
| Working Correlation Matrix Structure | Independent   |

### Case Processing Summary

|          | N  | Percent |
|----------|----|---------|
| Included | 48 | 100.0%  |
| Excluded | 0  | 0.0%    |
| Total    | 48 | 100.0%  |

### Correlated Data Summary

|                                    |                |         |    |
|------------------------------------|----------------|---------|----|
| Number of Levels                   | Subject Effect | Subject | 13 |
| Number of Subjects                 |                |         | 13 |
| Number of Measurements per Subject | Minimum        |         | 2  |
|                                    | Maximum        |         | 4  |
| Correlation Matrix Dimension       |                |         | 4  |

### Categorical Variable Information

|        |         |           | N  | Percent |
|--------|---------|-----------|----|---------|
| Factor | Terrain | Regular   | 26 | 54.2%   |
|        |         | Irregular | 22 | 45.8%   |
|        |         | Total     | 48 | 100.0%  |
|        | Running | Free      | 24 | 50.0%   |
|        |         | Nordic    | 24 | 50.0%   |
|        |         | Total     | 48 | 100.0%  |

### Continuous Variable Information

|                    |               | N  | Minimum | Maximum | Mean   |
|--------------------|---------------|----|---------|---------|--------|
| Dependent Variable | KneeFlexionRT | 48 | 62.3    | 118.6   | 87.140 |

### Continuous Variable Information

|                    |               | Std. Deviation |
|--------------------|---------------|----------------|
| Dependent Variable | KneeFlexionRT | 13.1869        |



## Goodness of Fit<sup>a</sup>

|                                                                                   | Value |
|-----------------------------------------------------------------------------------|-------|
| Quasi Likelihood under Independence Model Criterion (QIC) <sup>b</sup>            | 8.331 |
| Corrected Quasi Likelihood under Independence Model Criterion (QICC) <sup>b</sup> | 8.744 |

Dependent Variable: KneeFlexionRT  
Model: (Intercept), Terrain, Running,  
Terrain \* Running

- Information criteria are in smaller-is-better form.
- Computed using the full log quasi-likelihood function.

## Tests of Model Effects

| Source            | Wald Chi-Square | Type III |      |
|-------------------|-----------------|----------|------|
|                   |                 | df       | Sig. |
| (Intercept)       | 26304.698       | 1        | .000 |
| Terrain           | 26.875          | 1        | .000 |
| Running           | 6.079           | 1        | .014 |
| Terrain * Running | .381            | 1        | .537 |

Dependent Variable: KneeFlexionRT  
Model: (Intercept), Terrain, Running, Terrain \* Running

### Parameter Estimates

| Parameter                          | B              | Std. Error | 95% Wald Confidence Interval |       | Hypothesis Test |
|------------------------------------|----------------|------------|------------------------------|-------|-----------------|
|                                    |                |            | Lower                        | Upper | Wald Chi-Square |
| (Intercept)                        | 4.530          | .0330      | 4.466                        | 4.595 | 18833.029       |
| [Terrain=1.00]                     | -.176          | .0313      | -.237                        | -.114 | 31.472          |
| [Terrain=2.00]                     | 0 <sup>a</sup> | .          | .                            | .     | .               |
| [Running=1.00]                     | .047           | .0205      | .007                         | .087  | 5.209           |
| [Running=2.00]                     | 0 <sup>a</sup> | .          | .                            | .     | .               |
| [Terrain=1.00] *<br>[Running=1.00] | .019           | .0302      | -.041                        | .078  | .381            |
| [Terrain=1.00] *<br>[Running=2.00] | 0 <sup>a</sup> | .          | .                            | .     | .               |
| [Terrain=2.00] *<br>[Running=1.00] | 0 <sup>a</sup> | .          | .                            | .     | .               |
| [Terrain=2.00] *<br>[Running=2.00] | 0 <sup>a</sup> | .          | .                            | .     | .               |
| (Scale)                            | .016           |            |                              |       |                 |

### Parameter Estimates

| Parameter                          | Hypothesis Test |      |
|------------------------------------|-----------------|------|
|                                    | df              | Sig. |
| (Intercept)                        | 1               | .000 |
| [Terrain=1.00]                     | 1               | .000 |
| [Terrain=2.00]                     | .               | .    |
| [Running=1.00]                     | 1               | .022 |
| [Running=2.00]                     | .               | .    |
| [Terrain=1.00] *<br>[Running=1.00] | 1               | .537 |
| [Terrain=1.00] *<br>[Running=2.00] | .               | .    |
| [Terrain=2.00] *<br>[Running=1.00] | .               | .    |
| [Terrain=2.00] *<br>[Running=2.00] | .               | .    |
| (Scale)                            |                 |      |

Dependent Variable: KneeFlexionRT

Model: (Intercept), Terrain, Running, Terrain \* Running

a. Set to zero because this parameter is redundant.

### Estimated Marginal Means 1: Terrain

### Estimates

| Terrain   | Mean   | Std. Error | 95% Wald Confidence Interval |         |
|-----------|--------|------------|------------------------------|---------|
|           |        |            | Lower                        | Upper   |
| Regular   | 80.429 | 2.7292     | 75.254                       | 85.960  |
| Irregular | 94.995 | 2.8237     | 89.618                       | 100.693 |

### Pairwise Comparisons

| (I) Terrain | (J) Terrain | Mean Difference (I-J) | Std. Error | df | Bonferroni Sig. | 95% Wald Confidence ... |
|-------------|-------------|-----------------------|------------|----|-----------------|-------------------------|
|             |             |                       |            |    |                 | Lower                   |
| Regular     | Irregular   | -14.566 <sup>a</sup>  | 2.7839     | 1  | .000            | -20.022                 |
| Irregular   | Regular     | 14.566 <sup>a</sup>   | 2.7839     | 1  | .000            | 9.110                   |

### Pairwise Comparisons

| (I) Terrain | (J) Terrain | 95% Wald Confidence ... |
|-------------|-------------|-------------------------|
|             |             | Upper                   |
| Regular     | Irregular   | -9.110                  |
| Irregular   | Regular     | 20.022                  |

Pairwise comparisons of estimated marginal means based on the original scale of dependent variable KneeFlexionRT

a. The mean difference is significant at the .05 level.

### Overall Test Results

| Wald Chi-Square | df | Sig. |
|-----------------|----|------|
| 27.377          | 1  | .000 |

The Wald chi-square tests the effect of Terrain. This test is based on the linearly independent pairwise comparisons among the estimated marginal means.

## Estimated Marginal Means 2: Running

### Estimates

| Running | Mean   | Std. Error | 95% Wald Confidence Interval |        |
|---------|--------|------------|------------------------------|--------|
|         |        |            | Lower                        | Upper  |
| Free    | 89.899 | 2.9999     | 84.207                       | 95.975 |
| Nordic  | 84.988 | 2.1925     | 80.798                       | 89.396 |

### Pairwise Comparisons

| (I) Running | (J) Running | Mean Difference (I-J) | Std. Error | df | Bonferroni Sig. | 95% Wald Confidence ...<br>Lower |
|-------------|-------------|-----------------------|------------|----|-----------------|----------------------------------|
| Free        | Nordic      | 4.911 <sup>a</sup>    | 2.0443     | 1  | .016            | .904                             |
| Nordic      | Free        | -4.911 <sup>a</sup>   | 2.0443     | 1  | .016            | -8.917                           |

### Pairwise Comparisons

| (I) Running | (J) Running | 95% Wald Confidence ...<br>Upper |
|-------------|-------------|----------------------------------|
| Free        | Nordic      | 8.917                            |
| Nordic      | Free        | -.904                            |

Pairwise comparisons of estimated marginal means based on the original scale of dependent variable KneeFlexionRT

a. The mean difference is significant at the .05 level.

### Overall Test Results

| Wald Chi-Square | df | Sig. |
|-----------------|----|------|
| 5.770           | 1  | .016 |

The Wald chi-square tests the effect of Running. This test is based on the linearly independent pairwise comparisons among the estimated marginal means.

### Estimated Marginal Means 3: Terrain\* Running

#### Estimates

| Terrain   | Running | Mean   | Std. Error | 95% Wald Confidence Interval |         |
|-----------|---------|--------|------------|------------------------------|---------|
|           |         |        |            | Lower                        | Upper   |
| Regular   | Free    | 83.106 | 3.8153     | 75.955                       | 90.931  |
|           | Nordic  | 77.837 | 2.1061     | 73.817                       | 82.077  |
| Irregular | Free    | 97.246 | 2.8978     | 91.729                       | 103.095 |
|           | Nordic  | 92.795 | 3.0634     | 86.981                       | 98.998  |

### Pairwise Comparisons

| (I) Running*Terrain           | (J) Running*Terrain           | Mean Difference (I-J) | Std. Error | df |
|-------------------------------|-------------------------------|-----------------------|------------|----|
| [Running=1.00]*[Terrain=1.00] | [Running=1.00]*[Terrain=2.00] | -14.140 <sup>a</sup>  | 3.3414     | 1  |
|                               | [Running=2.00]*[Terrain=1.00] | 5.269                 | 2.7508     | 1  |
|                               | [Running=2.00]*[Terrain=2.00] | -9.689                | 4.0818     | 1  |
| [Running=1.00]*[Terrain=2.00] | [Running=1.00]*[Terrain=1.00] | 14.140 <sup>a</sup>   | 3.3414     | 1  |
|                               | [Running=2.00]*[Terrain=1.00] | 19.409 <sup>a</sup>   | 2.6413     | 1  |
|                               | [Running=2.00]*[Terrain=2.00] | 4.450                 | 1.9329     | 1  |
| [Running=2.00]*[Terrain=1.00] | [Running=1.00]*[Terrain=1.00] | -5.269                | 2.7508     | 1  |
|                               | [Running=1.00]*[Terrain=2.00] | -19.409 <sup>a</sup>  | 2.6413     | 1  |
|                               | [Running=2.00]*[Terrain=2.00] | -14.958 <sup>a</sup>  | 2.7841     | 1  |
| [Running=2.00]*[Terrain=2.00] | [Running=1.00]*[Terrain=1.00] | 9.689                 | 4.0818     | 1  |
|                               | [Running=1.00]*[Terrain=2.00] | -4.450                | 1.9329     | 1  |
|                               | [Running=2.00]*[Terrain=1.00] | 14.958 <sup>a</sup>   | 2.7841     | 1  |

### Pairwise Comparisons

| (I) Running*Terrain           | (J) Running*Terrain           | Bonferroni Sig. | 95% Wald Confidence ...<br>Lower |
|-------------------------------|-------------------------------|-----------------|----------------------------------|
| [Running=1.00]*[Terrain=1.00] | [Running=1.00]*[Terrain=2.00] | .000            | -22.955                          |
|                               | [Running=2.00]*[Terrain=1.00] | .333            | -1.989                           |
|                               | [Running=2.00]*[Terrain=2.00] | .106            | -20.458                          |
| [Running=1.00]*[Terrain=2.00] | [Running=1.00]*[Terrain=1.00] | .000            | 5.324                            |
|                               | [Running=2.00]*[Terrain=1.00] | .000            | 12.440                           |
|                               | [Running=2.00]*[Terrain=2.00] | .128            | -.649                            |
| [Running=2.00]*[Terrain=1.00] | [Running=1.00]*[Terrain=1.00] | .333            | -12.526                          |
|                               | [Running=1.00]*[Terrain=2.00] | .000            | -26.377                          |
|                               | [Running=2.00]*[Terrain=2.00] | .000            | -22.303                          |
| [Running=2.00]*[Terrain=2.00] | [Running=1.00]*[Terrain=1.00] | .106            | -1.080                           |
|                               | [Running=1.00]*[Terrain=2.00] | .128            | -9.550                           |
|                               | [Running=2.00]*[Terrain=1.00] | .000            | 7.613                            |

### Pairwise Comparisons

| (I) Running*Terrain           | (J) Running*Terrain           | 95% Wald Confidence ...<br>Upper |
|-------------------------------|-------------------------------|----------------------------------|
| [Running=1.00]*[Terrain=1.00] | [Running=1.00]*[Terrain=2.00] | -5.324                           |
|                               | [Running=2.00]*[Terrain=1.00] | 12.526                           |
|                               | [Running=2.00]*[Terrain=2.00] | 1.080                            |
| [Running=1.00]*[Terrain=2.00] | [Running=1.00]*[Terrain=1.00] | 22.955                           |
|                               | [Running=2.00]*[Terrain=1.00] | 26.377                           |
|                               | [Running=2.00]*[Terrain=2.00] | 9.550                            |
| [Running=2.00]*[Terrain=1.00] | [Running=1.00]*[Terrain=1.00] | 1.989                            |
|                               | [Running=1.00]*[Terrain=2.00] | -12.440                          |
|                               | [Running=2.00]*[Terrain=2.00] | -7.613                           |
| [Running=2.00]*[Terrain=2.00] | [Running=1.00]*[Terrain=1.00] | 20.458                           |
|                               | [Running=1.00]*[Terrain=2.00] | .649                             |
|                               | [Running=2.00]*[Terrain=1.00] | 22.303                           |

Pairwise comparisons of estimated marginal means based on the original scale of dependent variable KneeFlexionRT

- a. The mean difference is significant at the .05 level.

### Overall Test Results

| Wald Chi-Square | df | Sig. |
|-----------------|----|------|
| 54.049          | 3  | .000 |

The Wald chi-square tests the effect of Running\*Terrain. This test is based on the linearly independent pairwise comparisons among the estimated marginal means.

GENLIN AnkleDorsiflexionRTBY Terrain Running (ORDER=ASCENDING)

```

/MODEL Terrain Running Terrain*Running INTERCEPT=YES
DISTRIBUTION=GAMMA LINK=LOG
/CRITERIA SCALE=MLE PCONVERGE=1E-006(ABSOLUTE) SINGULAR=1E-012 ANALYSISTY
PE=3(WALD) CILEVEL=95
    LIKELIHOOD=FULL
/EMMEANS TABLES=Terrain SCALE=ORIGINAL COMPARE=Terrain CONTRAST=PAIRWISE
PADJUST=BONFERRONI
/EMMEANS TABLES=Running SCALE=ORIGINAL COMPARE=Running CONTRAST=PAIRWISE
PADJUST=BONFERRONI
/EMMEANS TABLES=Terrain*Running SCALE=ORIGINAL COMPARE=Running CONTRAST=PA
AIRWISE
    PADJUST=BONFERRONI
/EMMEANS TABLES=Terrain*Running SCALE=ORIGINAL COMPARE=Terrain CONTRAST=PA
IRWISE
    PADJUST=BONFERRONI
/REPEATED SUBJECT=Subject SORT=YES CORRTYPE=INDEPENDENT ADJUSTCORR=YES CO
VB=ROBUST
/MISSING CLASSMISSING=EXCLUDE
/PRINT CPS DESCRIPTIVES MODELINFO FIT SUMMARY SOLUTION.

```

## Generalized Linear Models

### Notes

|                        |                                |                                                                                                                                                            |
|------------------------|--------------------------------|------------------------------------------------------------------------------------------------------------------------------------------------------------|
| Output Created         |                                | 31-OCT-2023 12:51:48                                                                                                                                       |
| Comments               |                                |                                                                                                                                                            |
| Input                  | Data                           | C:<br>\Users\andre\Documents\<br>Andre\Pesquisa\Artigos<br>para Publicar\Nordic<br>Running\Data\Statistics\S<br>PSS\Angular_Parameters<br>_Range_Swing.sav |
|                        | Active Dataset                 | DataSet10                                                                                                                                                  |
|                        | Filter                         | <none>                                                                                                                                                     |
|                        | Weight                         | <none>                                                                                                                                                     |
|                        | Split File                     | <none>                                                                                                                                                     |
|                        | N of Rows in Working Data File | 48                                                                                                                                                         |
| Missing Value Handling | Definition of Missing          | User-defined missing values for factor, subject and within-subject variables are treated as missing.                                                       |
|                        | Cases Used                     | Statistics are based on cases with valid data for all variables in the model.                                                                              |
| Weight Handling        |                                | not applicable                                                                                                                                             |



## Notes

Syntax

```
GENLIN
AnkleDorsiflexionRT BY
Terrain Running
(ORDER=ASCENDING)
  /MODEL Terrain Running
Terrain*Running
INTERCEPT=YES
DISTRIBUTION=GAMMA
LINK=LOG
  /CRITERIA SCALE=MLE
PCONVERGE=1E-006
(ABSOLUTE)
SINGULAR=1E-012
ANALYSISTYPE=3
(WALD) CILEVEL=95
  LIKELIHOOD=FULL
  /EMMEANS
TABLES=Terrain
SCALE=ORIGINAL
COMPARE=Terrain
CONTRAST=PAIRWISE
PADJUST=BONFERRONI
  /EMMEANS
TABLES=Running
SCALE=ORIGINAL
COMPARE=Running
CONTRAST=PAIRWISE
PADJUST=BONFERRONI
  /EMMEANS
TABLES=Terrain*Running
SCALE=ORIGINAL
COMPARE=Running
CONTRAST=PAIRWISE

PADJUST=BONFERRONI
  /EMMEANS
TABLES=Terrain*Running
SCALE=ORIGINAL
COMPARE=Terrain
CONTRAST=PAIRWISE

PADJUST=BONFERRONI
  /REPEATED
SUBJECT=Subject
SORT=YES
CORRTYPE=INDEPENDENT
ADJUSTCORR=YES
COVB=ROBUST
  /MISSING
CLASSMISSING=EXCLUDE
  /PRINT CPS
DESCRIPTIVES
MODELINFO FIT
SUMMARY SOLUTION.
```

## Notes

|           |                |             |
|-----------|----------------|-------------|
| Resources | Processor Time | 00:00:00.05 |
|           | Elapsed Time   | 00:00:00.05 |

## Model Information

|                                      |                     |
|--------------------------------------|---------------------|
| Dependent Variable                   | AnkleDorsiflexionRT |
| Probability Distribution             | Gamma               |
| Link Function                        | Log                 |
| Subject Effect 1                     | Subject             |
| Working Correlation Matrix Structure | Independent         |

## Case Processing Summary

|          | N  | Percent |
|----------|----|---------|
| Included | 48 | 100.0%  |
| Excluded | 0  | 0.0%    |
| Total    | 48 | 100.0%  |

## Correlated Data Summary

|                                    |                |         |    |
|------------------------------------|----------------|---------|----|
| Number of Levels                   | Subject Effect | Subject | 13 |
| Number of Subjects                 |                |         | 13 |
| Number of Measurements per Subject | Minimum        |         | 2  |
|                                    | Maximum        |         | 4  |
| Correlation Matrix Dimension       |                |         | 4  |

## Categorical Variable Information

|        |         |           | N  | Percent |
|--------|---------|-----------|----|---------|
| Factor | Terrain | Regular   | 26 | 54.2%   |
|        |         | Irregular | 22 | 45.8%   |
|        |         | Total     | 48 | 100.0%  |
|        | Running | Free      | 24 | 50.0%   |
|        |         | Nordic    | 24 | 50.0%   |
|        |         | Total     | 48 | 100.0%  |

## Continuous Variable Information

|                    |                     | N  | Minimum | Maximum | Mean   |
|--------------------|---------------------|----|---------|---------|--------|
| Dependent Variable | AnkleDorsiflexionRT | 48 | 14.7    | 43.7    | 34.231 |

## Continuous Variable Information

| Dependent Variable | AnkleDorsiflexionRT | Std. Deviation |
|--------------------|---------------------|----------------|
|                    |                     | 5.7179         |

### Goodness of Fit<sup>a</sup>

|                                                                                   | Value |
|-----------------------------------------------------------------------------------|-------|
| Quasi Likelihood under Independence Model Criterion (QIC) <sup>b</sup>            | 8.135 |
| Corrected Quasi Likelihood under Independence Model Criterion (QICC) <sup>b</sup> | 9.557 |

Dependent Variable:  
AnkleDorsiflexionRT  
Model: (Intercept), Terrain, Running,  
Terrain \* Running

- a. Information criteria are in smaller-is-better form.
- b. Computed using the full log quasi-likelihood function.

### Tests of Model Effects

| Source            | Wald Chi-Square | Type III |      |
|-------------------|-----------------|----------|------|
|                   |                 | df       | Sig. |
| (Intercept)       | 6604.921        | 1        | .000 |
| Terrain           | .053            | 1        | .818 |
| Running           | 4.195           | 1        | .041 |
| Terrain * Running | 4.583           | 1        | .032 |

Dependent Variable: AnkleDorsiflexionRT  
Model: (Intercept), Terrain, Running, Terrain \* Running

### Parameter Estimates

| Parameter                          | B              | Std. Error | 95% Wald Confidence Interval |       | Hypothesis Test |
|------------------------------------|----------------|------------|------------------------------|-------|-----------------|
|                                    |                |            | Lower                        | Upper | Wald Chi-Square |
| (Intercept)                        | 3.529          | .0459      | 3.439                        | 3.619 | 5919.618        |
| [Terrain=1.00]                     | .045           | .0261      | -.006                        | .096  | 2.984           |
| [Terrain=2.00]                     | 0 <sup>a</sup> | .          | .                            | .     | .               |
| [Running=1.00]                     | .001           | .0288      | -.056                        | .057  | .001            |
| [Running=2.00]                     | 0 <sup>a</sup> | .          | .                            | .     | .               |
| [Terrain=1.00] *<br>[Running=1.00] | -.080          | .0373      | -.153                        | -.007 | 4.583           |
| [Terrain=1.00] *<br>[Running=2.00] | 0 <sup>a</sup> | .          | .                            | .     | .               |
| [Terrain=2.00] *<br>[Running=1.00] | 0 <sup>a</sup> | .          | .                            | .     | .               |
| [Terrain=2.00] *<br>[Running=2.00] | 0 <sup>a</sup> | .          | .                            | .     | .               |
| (Scale)                            | .029           |            |                              |       |                 |

### Parameter Estimates

| Parameter                          | Hypothesis Test |      |
|------------------------------------|-----------------|------|
|                                    | df              | Sig. |
| (Intercept)                        | 1               | .000 |
| [Terrain=1.00]                     | 1               | .084 |
| [Terrain=2.00]                     | .               | .    |
| [Running=1.00]                     | 1               | .975 |
| [Running=2.00]                     | .               | .    |
| [Terrain=1.00] *<br>[Running=1.00] | 1               | .032 |
| [Terrain=1.00] *<br>[Running=2.00] | .               | .    |
| [Terrain=2.00] *<br>[Running=1.00] | .               | .    |
| [Terrain=2.00] *<br>[Running=2.00] | .               | .    |
| (Scale)                            |                 |      |

Dependent Variable: AnkleDorsiflexionRT

Model: (Intercept), Terrain, Running, Terrain \* Running

a. Set to zero because this parameter is redundant.

### Estimated Marginal Means 1: Terrain

### Estimates

| Terrain   | Mean   | Std. Error | 95% Wald Confidence Interval |        |
|-----------|--------|------------|------------------------------|--------|
|           |        |            | Lower                        | Upper  |
| Regular   | 34.298 | 1.6156     | 31.273                       | 37.616 |
| Irregular | 34.119 | 1.4550     | 31.383                       | 37.093 |

### Pairwise Comparisons

| (I) Terrain | (J) Terrain | Mean Difference (I-J) | Std. Error | df | Bonferroni Sig. | 95% Wald Confidence ... |
|-------------|-------------|-----------------------|------------|----|-----------------|-------------------------|
|             |             |                       |            |    |                 | Lower                   |
| Regular     | Irregular   | .179                  | .7801      | 1  | .818            | -1.350                  |
| Irregular   | Regular     | -.179                 | .7801      | 1  | .818            | -1.708                  |

### Pairwise Comparisons

| (I) Terrain | (J) Terrain | 95% Wald Confidence ... |
|-------------|-------------|-------------------------|
|             |             | Upper                   |
| Regular     | Irregular   | 1.708                   |
| Irregular   | Regular     | 1.350                   |

Pairwise comparisons of estimated marginal means based on the original scale of dependent variable AnkleDorsiflexionRT

### Overall Test Results

| Wald Chi-Square | df | Sig. |
|-----------------|----|------|
| .053            | 1  | .818 |

The Wald chi-square tests the effect of Terrain. This test is based on the linearly independent pairwise comparisons among the estimated marginal means.

## Estimated Marginal Means 2: Running

### Estimates

| Running | Mean   | Std. Error | 95% Wald Confidence Interval |        |
|---------|--------|------------|------------------------------|--------|
|         |        |            | Lower                        | Upper  |
| Free    | 33.548 | 1.6134     | 30.530                       | 36.864 |
| Nordic  | 34.882 | 1.4157     | 32.215                       | 37.771 |

### Pairwise Comparisons

| (I) Running | (J) Running | Mean Difference (I-J) | Std. Error | df | Bonferroni Sig. | 95% Wald Confidence ...<br>Lower |
|-------------|-------------|-----------------------|------------|----|-----------------|----------------------------------|
| Free        | Nordic      | -1.335 <sup>a</sup>   | .6307      | 1  | .034            | -2.571                           |
| Nordic      | Free        | 1.335 <sup>a</sup>    | .6307      | 1  | .034            | .099                             |

### Pairwise Comparisons

| (I) Running | (J) Running | 95% Wald Confidence ...<br>Upper |
|-------------|-------------|----------------------------------|
| Free        | Nordic      | -.099                            |
| Nordic      | Free        | 2.571                            |

Pairwise comparisons of estimated marginal means based on the original scale of dependent variable AnkleDorsiflexionRT

a. The mean difference is significant at the .05 level.

### Overall Test Results

| Wald Chi-Square | df | Sig. |
|-----------------|----|------|
| 4.479           | 1  | .034 |

The Wald chi-square tests the effect of Running. This test is based on the linearly independent pairwise comparisons among the estimated marginal means.

### Estimated Marginal Means 3: Terrain\* Running

#### Estimates

| Terrain   | Running | Mean   | Std. Error | 95% Wald Confidence Interval |        |
|-----------|---------|--------|------------|------------------------------|--------|
|           |         |        |            | Lower                        | Upper  |
| Regular   | Free    | 32.971 | 1.8656     | 29.510                       | 36.838 |
|           | Nordic  | 35.679 | 1.3963     | 33.045                       | 38.523 |
| Irregular | Free    | 34.134 | 1.5065     | 31.306                       | 37.218 |
|           | Nordic  | 34.104 | 1.5644     | 31.171                       | 37.312 |

### Pairwise Comparisons

| Terrain   | (I) Running | (J) Running | Mean Difference (I-J) | Std. Error | df | Bonferroni Sig. |
|-----------|-------------|-------------|-----------------------|------------|----|-----------------|
| Regular   | Free        | Nordic      | -2.708 <sup>a</sup>   | .7465      | 1  | .000            |
|           | Nordic      | Free        | 2.708 <sup>a</sup>    | .7465      | 1  | .000            |
| Irregular | Free        | Nordic      | .031                  | .9830      | 1  | .975            |
|           | Nordic      | Free        | -.031                 | .9830      | 1  | .975            |

### Pairwise Comparisons

| Terrain   | (I) Running | (J) Running | 95% Wald Confidence Interval for Difference |        |
|-----------|-------------|-------------|---------------------------------------------|--------|
|           |             |             | Lower                                       | Upper  |
| Regular   | Free        | Nordic      | -4.171                                      | -1.245 |
|           | Nordic      | Free        | 1.245                                       | 4.171  |
| Irregular | Free        | Nordic      | -1.896                                      | 1.957  |
|           | Nordic      | Free        | -1.957                                      | 1.896  |

Pairwise comparisons of estimated marginal means based on the original scale of dependent variable AnkleDorsiflexionRT

a. The mean difference is significant at the .05 level.

### Overall Test Results

| Terrain   | Wald Chi-Square | df | Sig. |
|-----------|-----------------|----|------|
| Regular   | 13.160          | 1  | .000 |
| Irregular | .001            | 1  | .975 |

Each Wald chi-square tests the simple effects of Running within each level combination of the other factors shown. These tests are based on the linearly independent pairwise comparisons among the estimated marginal means.

### Estimated Marginal Means 4: Terrain\* Running

#### Estimates

| Terrain   | Running | Mean   | Std. Error | 95% Wald Confidence Interval |        |
|-----------|---------|--------|------------|------------------------------|--------|
|           |         |        |            | Lower                        | Upper  |
| Regular   | Free    | 32.971 | 1.8656     | 29.510                       | 36.838 |
|           | Nordic  | 35.679 | 1.3963     | 33.045                       | 38.523 |
| Irregular | Free    | 34.134 | 1.5065     | 31.306                       | 37.218 |
|           | Nordic  | 34.104 | 1.5644     | 31.171                       | 37.312 |

### Pairwise Comparisons

| Running | (I) Terrain | (J) Terrain | Mean Difference (I-J) | Std. Error | df | Bonferroni Sig. |
|---------|-------------|-------------|-----------------------|------------|----|-----------------|
| Free    | Regular     | Irregular   | -1.163                | 1.0648     | 1  | .275            |
|         | Irregular   | Regular     | 1.163                 | 1.0648     | 1  | .275            |
| Nordic  | Regular     | Irregular   | 1.575                 | .8969      | 1  | .079            |
|         | Irregular   | Regular     | -1.575                | .8969      | 1  | .079            |

### Pairwise Comparisons

| Running | (I) Terrain | (J) Terrain | 95% Wald Confidence Interval for Difference |       |
|---------|-------------|-------------|---------------------------------------------|-------|
|         |             |             | Lower                                       | Upper |
| Free    | Regular     | Irregular   | -3.250                                      | .924  |
|         | Irregular   | Regular     | -.924                                       | 3.250 |
| Nordic  | Regular     | Irregular   | -.183                                       | 3.333 |
|         | Irregular   | Regular     | -3.333                                      | .183  |

Pairwise comparisons of estimated marginal means based on the original scale of dependent variable AnkleDorsiflexionRT

### Overall Test Results

| Running | Wald Chi-Square | df | Sig. |
|---------|-----------------|----|------|
| Free    | 1.194           | 1  | .275 |
| Nordic  | 3.084           | 1  | .079 |

Each Wald chi-square tests the simple effects of Terrain within each level combination of the other factors shown. These tests are based on the linearly independent pairwise comparisons among the estimated marginal means.
